# Supplementary material for: Palladium-catalyzed hydroarylation of 1,3-diynes with arylboronic acids
Source: Royal Society of Chemistry journal article supplement (doi:10.1039/d4ob01394h), 2024-01-01
Supplement: d4ob01394h1.pdf [file d4ob01394h1.pdf]

## Supporting Information

### Palladium-Catalyzed Hydroarylation of 1,3-diynes with Arylboronic

#### Acids

Hongtao Shen<sup>a</sup>, Xiaoyu Chen<sup>b</sup>, Jianhua Qiu<sup>a</sup>, Mengqi Chen<sup>a</sup>, Bohai Zhang<sup>b</sup>, and  
Zhiyong Wu<sup>b,\*</sup>

<sup>a</sup>Technology Center, China Tobacco Henan Industrial Co., Ltd., Zhengzhou, 450000, China.

<sup>b</sup>College of Tobacco Science, Henan Agricultural University, Zhengzhou, 450046, China.

\* Correspondence: zhiyongwu@henau.edu.cn (Z.W.); smileyongyong062@163.com.

#### *Table of Contents*

|                                                                                        |         |
|----------------------------------------------------------------------------------------|---------|
| 1. General information                                                                 | S2      |
| 2. General experimental procedures                                                     | S2      |
| 3. Characterization data of compounds <b>3aa-3qa</b> , <b>3bb-3be</b>                  | S2-S9   |
| 4. <sup>1</sup> H NMR, <sup>13</sup> C NMR spectra for <b>3aa-3qa</b> , <b>3bb-3be</b> | S9-S31  |
| 5. DFT Studies on the Plausible Reaction Mechanism                                     | S32-S66 |
| 6. References                                                                          | S66     |

## 1. General information

All reactions were carried out under air atmosphere in a dried tube. Chemicals were purchased without further purification. Silica gel was purchased from Qing Dao Hai Yang Chemical Industry Co., Ltd., Analytical thin layer chromatography (TLC) was performed on precoated silica gel F<sub>254</sub> plates. Compounds were visualized by irradiation with UV light (254 nm).

**Analytical information:** <sup>1</sup>H NMR and <sup>13</sup>C NMR spectra data were recorded by a BRUKER AVANCE III 400 MHz spectrometer (<sup>1</sup>H 400 MHz, <sup>13</sup>C 100 MHz), using CDCl<sub>3</sub> as the solvent with tetramethylsilane (TMS) as the internal standard at room temperature. <sup>1</sup>H NMR spectral data are given as chemical shifts in ppm followed by multiplicity (s- singlet; d- doublet; t- triplet; q- quartet; m- multiplet), number of protons and coupling constants. <sup>13</sup>C NMR chemical shifts were expressed in ppm. HRMS data were obtained using AB SCIEX Triple TOF 5600+ high resolution mass spectrometer (USA). The products listed below were determined by <sup>1</sup>H and <sup>13</sup>C NMR spectra.

## 2. General experimental procedures

The preparation of (*Z*)-2-(1,4-diphenylbut-1-en-3-yn-2-yl)furan (**3aa**) is representative for the synthesis of the 23 products.

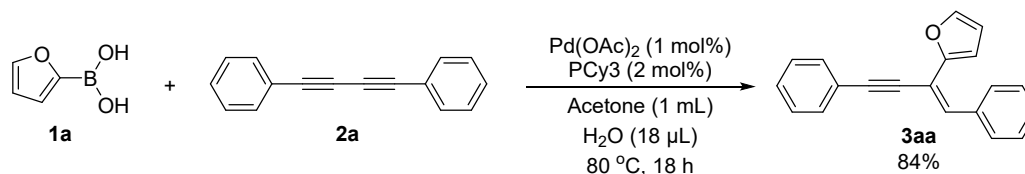

To a 10 mL tube, 2-furanboric acid **1a** (0.25mmol), 1,4-diphenylbutanediyne **2a** (0.25mmol), palladium acetate (0.0025mmol), tricyclohexylphosphine (0.005mmol), H<sub>2</sub>O (0.25 mmol) and acetone (1 mL) were added under air atmosphere. The tube was sealed and the resulting solution was heated in 80 °C with vigorous stirring for 18 h. After the reaction, the crude product was purified to obtain the target reaction product **3aa**. In general, the identity and purity of the products were confirmed by <sup>1</sup>H and <sup>13</sup>C NMR spectroscopy and HRMS.

## 3. Characterization data of compounds 3aa-3qa, 3bb-3be

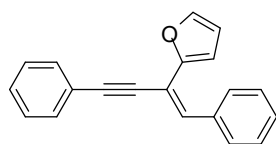

**(Z)-2-(1,4-diphenylbut-1-en-3-yn-2-yl)furan (3aa)** Purification by column chromatography on silica gel (*R<sub>f</sub>* = 0.58, petroleum ether/dichloromethane = 50:1) yielded **3aa** (56.8 mg, 84%) as a brown solid; <sup>1</sup>H NMR (400 MHz, CDCl<sub>3</sub>) ppm: 7.99

(d,  $J = 7.6$  Hz, 2H), 7.61-7.51 (m, 2H), 7.43-7.34 (m, 8H), 6.68 (d,  $J = 3.3$  Hz, 1H), 6.47 (dd,  $J = 3.3, 1.80$  Hz, 1H);  $^{13}\text{C}$  NMR (100 MHz,  $\text{CDCl}_3$ ) ppm: 153.35, 142.52, 136.33, 131.61, 130.66, 129.10, 128.72, 128.53, 128.39, 128.35, 123.08, 111.83, 111.58, 108.73, 95.29, 86.10; HRMS (ESI) calcd. For  $\text{C}_{20}\text{H}_{14}\text{O}$   $[\text{M}+\text{H}]^+$ : 271.1117, found: 271.1125.

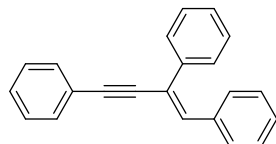

**(E)-but-1-en-3-yne-1,2,4-triyltribenzene (3ba):** Purification by column chromatography on silica gel ( $R_f = 0.56$ , petroleum ether/dichloromethane = 50:1) yielded **5a** (56.1 mg, 80%) as a brown solid;  $^1\text{H}$  NMR (400 MHz,  $\text{CDCl}_3$ ) ppm: 8.02 (d,  $J = 7.4$  Hz, 2H), 7.82-7.77 (m, 2H), 7.57-7.51 (m, 2H), 7.43-7.39 (m, 4H), 7.38-7.29 (m, 5H), 7.22-7.21 (m, 1H);  $^{13}\text{C}$  NMR (100 MHz,  $\text{CDCl}_3$ ) ppm: 139.60, 136.75, 134.83, 131.61, 129.21, 128.55, 128.51, 128.40, 128.37, 127.98, 126.53, 123.41, 121.73, 97.00, 88.72; HRMS (ESI) calcd. For  $\text{C}_{22}\text{H}_{16}$   $[\text{M}+\text{H}]^+$ : 281.1325, found: 281.1334. CAS Number: 62677-52-5.

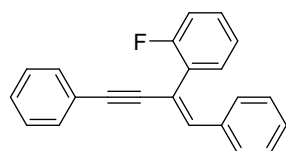

**(Z)-(2-(2-fluorophenyl)but-1-en-3-yne-1,4-diyl)dibenzene (3ca)** Purification by column chromatography on silica gel ( $R_f = 0.54$ , petroleum ether/dichloromethane = 40:1) yielded **5b** (64.1 mg, 86%) as a brown solid;  $^1\text{H}$  NMR (400 MHz,  $\text{CDCl}_3$ ) ppm: 8.01 (d,  $J = 7.4$  Hz, 2H), 7.69 (td,  $J = 7.8, 1.7$  Hz, 1H), 7.54-7.08 (m, 12H);  $^{13}\text{C}$  NMR (100 MHz,  $\text{CDCl}_3$ ) ppm: 161.15, 158.67, 139.14, 139.07, 136.52, 131.59, 130.58, 130.55, 129.29, 129.26, 129.20, 128.68, 128.57, 128.48, 128.36, 128.11, 127.99, 124.21, 124.18, 123.34, 116.39, 116.21, 116.20, 116.16, 95.91, 88.76; HRMS (ESI) calcd. For  $\text{C}_{22}\text{H}_{15}\text{F}$   $[\text{M}+\text{H}]^+$ : 299.1231, found: 299.1236.

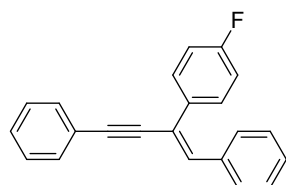

**(E)-(2-(4-fluorophenyl)but-1-en-3-yne-1,4-diyl)dibenzene (3da)** Purification by column chromatography on silica gel ( $R_f = 0.54$ , petroleum ether/dichloromethane = 40:1) yielded **5c** (60.4 mg, 81%) as a brown solid;  $^1\text{H}$  NMR (400 MHz,  $\text{CDCl}_3$ ) ppm: 8.00 (d,  $J = 7.5$  Hz, 2H), 7.78-7.71 (m, 2H), 7.56-7.50 (m, 2H), 7.42-7.29 (m, 6H), 7.14 (s, 1H), 7.11-7.06 (m, 2H);  $^{13}\text{C}$  NMR (100 MHz,  $\text{CDCl}_3$ ) ppm: 163.90, 161.44, 136.59, 135.69, 135.66, 134.63, 134.61, 131.60, 129.15, 128.68, 128.54, 128.47, 128.40, 128.22, 128.14, 123.23, 120.66, 115.51, 115.30, 97.15, 88.50; HRMS (ESI) calcd. For  $\text{C}_{22}\text{H}_{15}\text{F}$   $[\text{M}+\text{H}]^+$ : 299.1231, found: 299.1234.

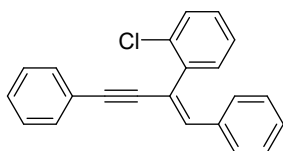

**(Z)-2-(2-(2-chlorophenyl)but-1-en-3-yn-1,4-diyl)dibenzene (3ea)** Purification by column chromatography on silica gel ( $R_f = 0.57$ , petroleum ether/dichloromethane = 40:1) yielded **3ea** (30.7 mg, 39%) as a brown solid;  $^1\text{H NMR}$  (400 MHz,  $\text{CDCl}_3$ ) ppm: 8.05-8.00 (m, 2H), 7.52-7.40 (m, 6H), 7.36-7.25 (m, 6H), 6.89 (s, 1H);  $^{13}\text{C NMR}$  (100 MHz,  $\text{CDCl}_3$ ) ppm: 139.72, 139.29, 136.17, 132.82, 131.51, 130.76, 130.16, 129.04, 128.86, 128.72, 128.38, 126.89, 123.40, 119.72, 97.09, 88.56; HRMS (ESI) calcd. For  $\text{C}_{22}\text{H}_{15}\text{Cl}$   $[\text{M}+\text{H}]^+$ : 315.0936, found:315.0939.

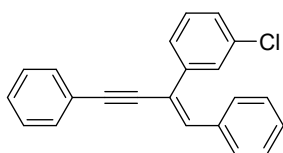

**(E)-2-(3-chlorophenyl)but-1-en-3-yn-1,4-diyl)dibenzene (3fa)** Purification by column chromatography on silica gel ( $R_f = 0.57$ , petroleum ether/dichloromethane = 40:1) yielded **3fa** (51.2 mg, 65%) as a brown solid;  $^1\text{H NMR}$  (400 MHz,  $\text{CDCl}_3$ ) ppm: 8.01 (d,  $J = 7.5$  Hz, 2H), 7.76 (t,  $J = 1.7$  Hz, 1H), 7.66 (dt,  $J = 7.3, 1.7$  Hz, 1H), 7.57-7.51 (m, 2H), 7.43-7.27 (m, 8H), 7.20 (s, 1H);  $^{13}\text{C NMR}$  (100 MHz,  $\text{CDCl}_3$ ) ppm: 141.45, 136.34, 135.61, 134.52, 131.64, 129.73, 129.31, 128.75, 128.55, 128.43, 127.92, 126.64, 124.67, 123.12, 120.41, 97.34, 88.08; HRMS (ESI) calcd. For  $\text{C}_{22}\text{H}_{15}\text{Cl}$   $[\text{M}+\text{H}]^+$ : 315.0936, found:315.0928

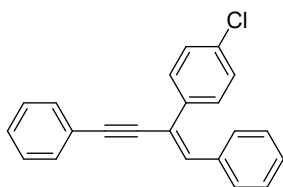

**(E)-2-(4-chlorophenyl)but-1-en-3-yn-1,4-diyl)dibenzene (3ga)** Purification by column chromatography on silica gel ( $R_f = 0.57$ , petroleum ether/dichloromethane = 40:1) yielded **3ga** (52.7 mg, 67%) as a brown solid;  $^1\text{H NMR}$  (400 MHz,  $\text{CDCl}_3$ ) ppm: 8.00 (d,  $J = 7.5$  Hz, 2H), 7.74-7.69 (m, 2H), 7.56-7.51 (m, 2H), 7.43-7.31 (m, 8H), 7.18 (s, 1H);  $^{13}\text{C NMR}$  (100 MHz,  $\text{CDCl}_3$ ) ppm: 138.06, 136.46, 134.99, 133.79, 131.61, 129.31, 129.23, 128.73, 128.67, 128.62, 128.55, 128.42, 128.32, 127.97, 127.78, 123.16, 120.56, 97.28, 88.24; HRMS (ESI) calcd. For  $\text{C}_{22}\text{H}_{15}\text{Cl}$   $[\text{M}+\text{H}]^+$ : 315.0936, found:315.0939.

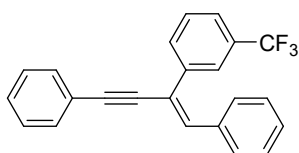

**(E)-2-(3-(trifluoromethyl)phenyl)but-1-en-3-yn-1,4-diyl)dibenzene (3ha)**

Purification by column chromatography on silica gel ( $R_f = 0.60$ , petroleum ether/dichloromethane = 40:1) yielded **3ha** (50.5 mg, 58%) as a brown solid;  $^1\text{H}$  NMR (400 MHz,  $\text{CDCl}_3$ ) ppm: 7.98 (d,  $J = 7.4$  Hz, 2H), 7.73 (d,  $J = 7.9$  Hz, 1H), 7.55-7.53 (m, 2H), 7.46-7.40 (m, 5H), 7.36-7.30 (m, 4H), 6.76 (s, 1H);  $^{13}\text{C}$  NMR (100 MHz,  $\text{CDCl}_3$ ) ppm: 140.16, 138.76, 138.75, 136.14, 131.78, 131.47, 131.25, 128.98, 128.71, 128.53, 128.40, 128.38, 128.25, 127.79, 126.59, 126.54, 123.29, 119.55, 97.50, 88.71; HRMS (ESI) calcd. For  $\text{C}_{23}\text{H}_{15}\text{F}_3$   $[\text{M}+\text{H}]^+$ : 349.1199, found:349.1205.

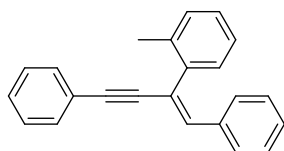

**(Z)-2-(o-tolyl)but-1-en-3-yne-1,4-diyl dibenzene (3ia)** Purification by column chromatography on silica gel ( $R_f = 0.53$ , petroleum ether/dichloromethane = 40:1) yielded **3ia** (61.1 mg, 83%) as a brown solid;  $^1\text{H}$  NMR (400 MHz,  $\text{CDCl}_3$ ) ppm: 8.00 (d,  $J = 7.4$  Hz, 2H), 7.47-7.36(m, 5H), 7.33-7.30 (m, 4H), 7.25-7.23 (m, 3H), 6.77 (s, 1H), 2.52 (s, 3H);  $^{13}\text{C}$  NMR (100 MHz,  $\text{CDCl}_3$ ) ppm: 140.97, 138.30, 136.66, 136.12, 131.64, 131.50, 130.59, 129.14, 128.94, 128.47, 128.43, 127.96, 127.83, 126.11, 125.84, 123.58, 122.30, 97.49, 89.19, 20.40; HRMS (ESI) calcd. For  $\text{C}_{23}\text{H}_{18}$   $[\text{M}+\text{H}]^+$ : 295.1482, found:295.1485.

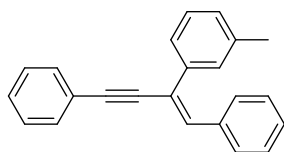

**(E)-2-(m-tolyl)but-1-en-3-yne-1,4-diyl dibenzene (3ja)** Purification by column chromatography on silica gel ( $R_f = 0.53$ , petroleum ether/dichloromethane = 40:1) yielded **3ja** (39.0 mg, 53%) as a brown solid;  $^1\text{H}$  NMR (400 MHz,  $\text{CDCl}_3$ ) ppm: 8.02 (d,  $J = 7.4$  Hz, 2H), 7.62-7.57 (m, 2H), 7.57-7.53 (m, 2H), 7.43-7.29 (m, 7H), 7.21 (s, 1H), 7.15 (d,  $J = 7.5$  Hz, 1H), 2.42 (s, 3H);  $^{13}\text{C}$  NMR (100 MHz,  $\text{CDCl}_3$ ) ppm: 139.60, 138.12, 136.80, 134.73, 131.60, 129.18, 128.77, 128.51, 128.49, 128.44, 128.34, 128.32, 127.20, 123.73, 123.47, 121.81, 96.87, 88.83, 21.62; HRMS (ESI) calcd. For  $\text{C}_{23}\text{H}_{18}$   $[\text{M}+\text{H}]^+$ : 295.1482, found:295.1482.

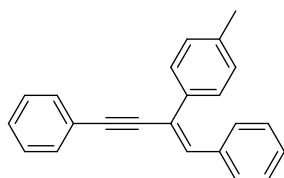

**(E)-2-(p-tolyl)but-1-en-3-yne-1,4-diyl dibenzene (3ka)** Purification by column chromatography on silica gel ( $R_f = 0.53$ , petroleum ether/dichloromethane = 40:1) yielded **3ka** (47.1 mg, 64%) as a brown solid;  $^1\text{H}$  NMR (400 MHz,  $\text{CDCl}_3$ ) ppm: 8.01 (d,  $J = 7.5$  Hz, 2H), 7.69 (d,  $J = 8.2$  Hz, 2H), 7.55-7.53 (m, 2H), 7.42-7.28 (m, 6H), 7.22 (d,  $J = 7.5$  Hz, 2H), 7.19 (s, 1H), 2.38 (s, 3H);  $^{13}\text{C}$  NMR (100 MHz,  $\text{CDCl}_3$ ) ppm:

137.90, 136.88, 136.78, 134.03, 131.61, 131.40, 129.26, 129.15, 128.50, 128.34, 128.24, 127.97, 127.82, 126.41, 123.49, 121.62, 96.86, 88.87, 29.77, 21.23; HRMS (ESI) calcd. For C<sub>23</sub>H<sub>18</sub> [M+H]<sup>+</sup>: 295.1482, found:295.1486.

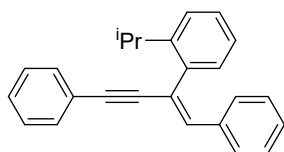

**(Z)-2-(2-isopropylphenyl)but-1-en-3-yn-1,4-diyl dibenzene (3la)** Purification by column chromatography on silica gel ( $R_f = 0.55$ , petroleum ether/dichloromethane = 40:1) yielded **3la** (58.1 mg, 72%) as a brown solid; <sup>1</sup>H NMR (400 MHz, CDCl<sub>3</sub>) ppm: 8.01 (d,  $J = 7.5$  Hz, 2H), 7.45-7.29 (m, 11H), 7.22-7.18(m, 1H), 6.75 (s, 1H), 3.60 (m, 1H), 1.28 (d,  $J = 6.8$  Hz, 6H); <sup>13</sup>C NMR (100 MHz, CDCl<sub>3</sub>) ppm: 147.04, 140.10, 138.21, 136.65, 131.44, 129.32, 128.89, 128.45, 128.42, 128.24, 125.87, 123.58, 122.26, 97.64, 89.67, 29.92, 24.29; HRMS (ESI) calcd. For C<sub>25</sub>H<sub>22</sub> [M+H]<sup>+</sup>: 323.1795, found:323.1802.

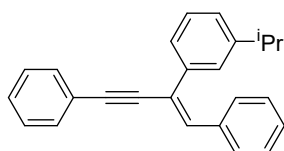

**(E)-2-(3-isopropylphenyl)but-1-en-3-yn-1,4-diyl dibenzene (3ma)** Purification by column chromatography on silica gel ( $R_f = 0.55$ , petroleum ether/dichloromethane = 40:1) yielded **3ma** (37.1 mg, 46%) as a brown solid; <sup>1</sup>H NMR (400 MHz, CDCl<sub>3</sub>) ppm: 8.03 (d,  $J = 7.5$  Hz, 2H), 7.66 (s, 1H), 7.61 (d,  $J = 7.8$  Hz, 1H), 7.56-7.53 (m, 2H), 7.44-7.21 (m, 9H), 2.98 (m, 1H), 1.31 (d,  $J = 6.9$  Hz, 6H); <sup>13</sup>C NMR (100 MHz, CDCl<sub>3</sub>) ppm: 149.14, 139.61, 136.83, 134.65, 131.57, 129.17, 128.49, 128.33, 128.29, 126.14, 124.77, 124.11, 123.49, 122.03, 96.89, 88.93, 34.29, 24.09; HRMS (ESI) calcd. For C<sub>25</sub>H<sub>22</sub> [M+H]<sup>+</sup>: 323.1795, found:323.1803.

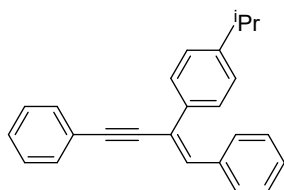

**(E)-2-(4-isopropylphenyl)but-1-en-3-yn-1,4-diyl dibenzene (3na)** Purification by column chromatography on silica gel ( $R_f = 0.55$ , petroleum ether/dichloromethane = 40:1) yielded **3na** (50.0 mg, 62%) as a brown solid; <sup>1</sup>H NMR (400 MHz, CDCl<sub>3</sub>) ppm: 8.01 (d,  $J = 7.4$  Hz, 2H), 7.76-7.69 (m, 2H), 7.54 (dt,  $J = 4.7, 3.0$  Hz, 2H), 7.41 (dd,  $J = 10.5, 4.8$  Hz, 2H), 7.38-7.33 (m, 3H), 7.33-7.29 (m, 1H), 7.28 (d,  $J = 8.2$  Hz, 2H), 7.19 (s, 1H), 3.02-2.88 (m, 1H), 1.28 (t,  $J = 5.1$  Hz, 6H); <sup>13</sup>C NMR (100 MHz, CDCl<sub>3</sub>) ppm: 148.89, 137.18, 136.88, 134.13, 131.60, 129.14, 128.48, 128.33, 128.22, 126.63, 126.50, 123.49, 121.64, 96.82, 88.89, 33.91, 24.01; HRMS (ESI) calcd. For C<sub>25</sub>H<sub>22</sub> [M+H]<sup>+</sup>: 323.1805, found:323.1809.

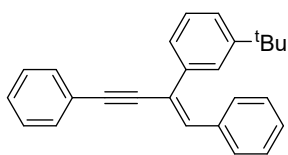

**(E)-2-(3-(tert-butyl)phenyl)but-1-en-3-yne-1,4-diyl dibenzene (30a)** Purification by column chromatography on silica gel ( $R_f = 0.58$ , petroleum ether/dichloromethane = 20:1) yielded **30a** (69.8 mg, 83%) as a brown solid;  $^1\text{H}$  NMR (400 MHz,  $\text{CDCl}_3$ ) ppm: 8.03 (d,  $J = 7.4$  Hz, 2H), 7.85-7.84 (m, 1H), 7.60 (dt,  $J = 7.1, 1.7$  Hz, 1H), 7.56-7.51 (m, 2H), 7.41-7.20 (m, 8H), 7.20 (s, 1H), 1.39 (s, 9H);  $^{13}\text{C}$  NMR (100 MHz,  $\text{CDCl}_3$ ) ppm: 151.40, 139.37, 136.88, 134.65, 131.58, 129.21, 128.55, 128.37, 128.33, 128.28, 125.14, 123.82, 123.68, 123.54, 122.30, 96.98, 89.06, 34.92, 31.48; HRMS (ESI) calcd. For  $\text{C}_{26}\text{H}_{24}$   $[\text{M}+\text{H}]^+$ : 337.1951, found:337.1945.

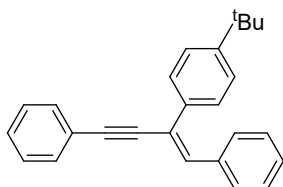

**(E)-2-(4-(tert-butyl)phenyl)but-1-en-3-yne-1,4-diyl dibenzene (3pa)** Purification by column chromatography on silica gel ( $R_f = 0.58$ , petroleum ether/dichloromethane = 40:1) yielded **3pa** (54.7 mg, 65%) as a brown solid;  $^1\text{H}$  NMR (400 MHz,  $\text{CDCl}_3$ ) ppm: 8.01 (d,  $J = 7.5$  Hz, 2H), 7.75-7.71 (m, 2H), 7.56-7.53 (m, 2H), 7.45-7.25 (m, 8H), 7.20 (d,  $J = 4.2$  Hz, 1H), 1.35 (s, 9H);  $^{13}\text{C}$  NMR (100 MHz,  $\text{CDCl}_3$ ) ppm: 151.14, 136.89, 136.78, 134.18, 131.61, 129.16, 128.49, 128.35, 128.25, 126.24, 125.51, 123.51, 121.55, 96.86, 88.89, 34.66, 31.38; HRMS (ESI) calcd. For  $\text{C}_{26}\text{H}_{24}$   $[\text{M}+\text{H}]^+$ : 337.1951, found:337.1954.

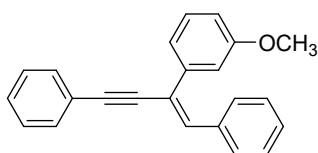

**(E)-2-(3-methoxyphenyl)but-1-en-3-yne-1,4-diyl dibenzene (3qa)** Purification by column chromatography on silica gel ( $R_f = 0.59$ , petroleum ether/dichloromethane = 20:1) yielded **3qa** (67.5 mg, 87%) as a brown solid;  $^1\text{H}$  NMR (400 MHz,  $\text{CDCl}_3$ ) ppm: 8.01 (d,  $J = 7.4$  Hz, 2H), 7.55-7.53 (m, 2H), 7.42-7.29 (m, 9H), 7.22 (s, 1H), 6.88 (ddd,  $J = 8.0, 2.5, 0.9$  Hz, 1H) 3.85 (s, 3H);  $^{13}\text{C}$  NMR (100 MHz,  $\text{CDCl}_3$ ) ppm: 159.80, 141.12, 136.68, 135.01, 131.61, 129.52, 129.27, 128.60, 128.53, 128.47, 128.39, 123.40, 121.58, 118.99, 113.42, 112.48, 97.00, 88.71, 55.38; HRMS (ESI) calcd. For  $\text{C}_{23}\text{H}_{18}\text{O}$   $[\text{M}+\text{H}]^+$ : 311.1431, found:311.1429.

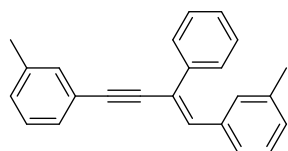

**(E)-3,3'-(2-phenylbut-1-en-3-yne-1,4-diyl)bis(methylbenzene) (3bb)** Purification by column chromatography on silica gel ( $R_f = 0.51$ , petroleum ether/dichloromethane = 40:1) yielded **3bb** (44.0 mg, 57%) as a brown solid;  $^1\text{H}$  NMR (400 MHz,  $\text{CDCl}_3$ ) ppm: 7.91 (d,  $J = 0.3$  Hz, 1H), 7.80-7.78 (m, 3H), 7.43-7.22 (m, 7H), 7.19 (s, 1H), 7.15 (t,  $J = 7.9$  Hz, 2H), 2.40 (s, 3H), 2.36 (s, 3H);  $^{13}\text{C}$  NMR (100 MHz,  $\text{CDCl}_3$ ) ppm: 139.71, 138.18, 137.77, 136.72, 134.83, 132.16, 129.79, 129.43, 129.19, 128.65, 128.52, 128.40, 128.26, 127.88, 126.51, 123.30, 121.54, 97.25, 88.57, 21.61, 21.30; HRMS (ESI) calcd. For  $\text{C}_{24}\text{H}_{20}$   $[\text{M}+\text{H}]^+$ : 309.1638, found:309.1638.

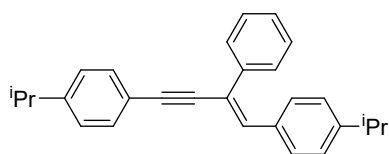

**(E)-4,4'-(2-phenylbut-1-en-3-yne-1,4-diyl)bis(isopropylbenzene) (3bc)** Purification by column chromatography on silica gel ( $R_f = 0.61$ , petroleum ether/dichloromethane = 40:1) yielded **3bc** (63.8 mg, 70%) as a light yellow solid;  $^1\text{H}$  NMR (400 MHz,  $\text{CDCl}_3$ ) ppm: 7.98 (d,  $J = 8.3$  Hz, 2H), 7.82-7.75 (m, 2H), 7.53-7.46 (m, 2H), 7.43-7.36 (m, 2H), 7.32-7.21 (5H), 7.18 (s, 1H), 2.97-2.89 (m, 2H), 1.28 (d,  $J = 5.6$  Hz, 3H), 1.26 (d,  $J = 5.5$  Hz, 3H);  $^{13}\text{C}$  NMR (100 MHz,  $\text{CDCl}_3$ ) ppm: 149.58, 149.38, 139.93, 134.47, 134.44, 131.62, 129.27, 128.49, 127.74, 126.66, 126.49, 126.47, 120.88, 120.80, 97.32, 88.29, 34.19, 34.11, 23.95, 23.87.

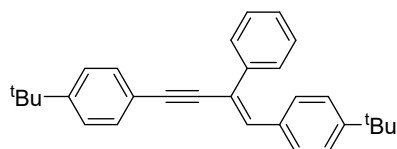

**(E)-4,4'-(2-phenylbut-1-en-3-yne-1,4-diyl)bis(tert-butylbenzene) (3bd)** Purification by column chromatography on silica gel ( $R_f = 0.62$ , petroleum ether/dichloromethane = 40:1) yielded **3bd** (84.4 mg, 86%) as a light yellow solid;  $^1\text{H}$  NMR (400 MHz,  $\text{CDCl}_3$ ) ppm: 8.00 (d,  $J = 8.4$  Hz, 2H), 7.80-7.78 (m, 2H), 7.53-7.48 (m, 2H), 7.45-7.38 (m, 7H), 7.33-7.28 (m, 2H), 7.18 (s, 1H), 1.35 (s, 9H), 1.34 (s, 9H);  $^{13}\text{C}$  NMR (100 MHz,  $\text{CDCl}_3$ ) ppm: 151.81, 151.60, 139.93, 134.30, 134.03, 131.34, 128.99, 128.47, 127.73, 126.49, 125.51, 125.32, 120.84, 120.54, 97.31, 88.32, 34.89, 34.82, 31.41, 31.31, 31.23.

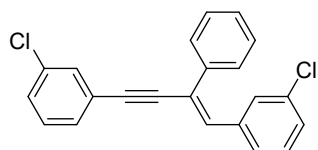

**(E)-3,3'-(2-phenylbut-1-en-3-yne-1,4-diyl)bis(chlorobenzene) (3be)** Purification by column chromatography on silica gel ( $R_f = 0.59$ , petroleum ether/dichloromethane =



40:1) yielded **3be** (62.0 mg, 71%) as a light yellow solid;  $^1\text{H}$  NMR (400 MHz,  $\text{CDCl}_3$ ) ppm: 8.19 (s, 1H), 7.78-7.71 (m, 2H), 7.67 (d,  $J = 7.2$  Hz, 1H), 7.55 (d,  $J = 1.7$  Hz, 1H), 7.47-7.38 (m, 3H), 7.38-7.27 (m, 6H), 7.15 (s, 1H);  $^{13}\text{C}$  NMR (100 MHz,  $\text{CDCl}_3$ ) ppm: 138.79, 138.29, 134.44, 134.29, 133.66, 131.47, 129.79, 129.78, 129.59, 129.04, 128.68, 128.58, 128.54, 128.42, 128.38, 127.69, 126.50, 124.70, 122.86, 96.25, 89.35; HRMS (ESI) calcd. For  $\text{C}_{22}\text{H}_{14}\text{Cl}_2$   $[\text{M}+\text{H}]^+$ : 349.0546, found:349.0548.

#### 4. $^1\text{H}$ NMR, $^{13}\text{C}$ NMR spectra for **3aa-3qa**, **3bb-3be**

$^1\text{H}$  NMR spectrum of compound **3aa**

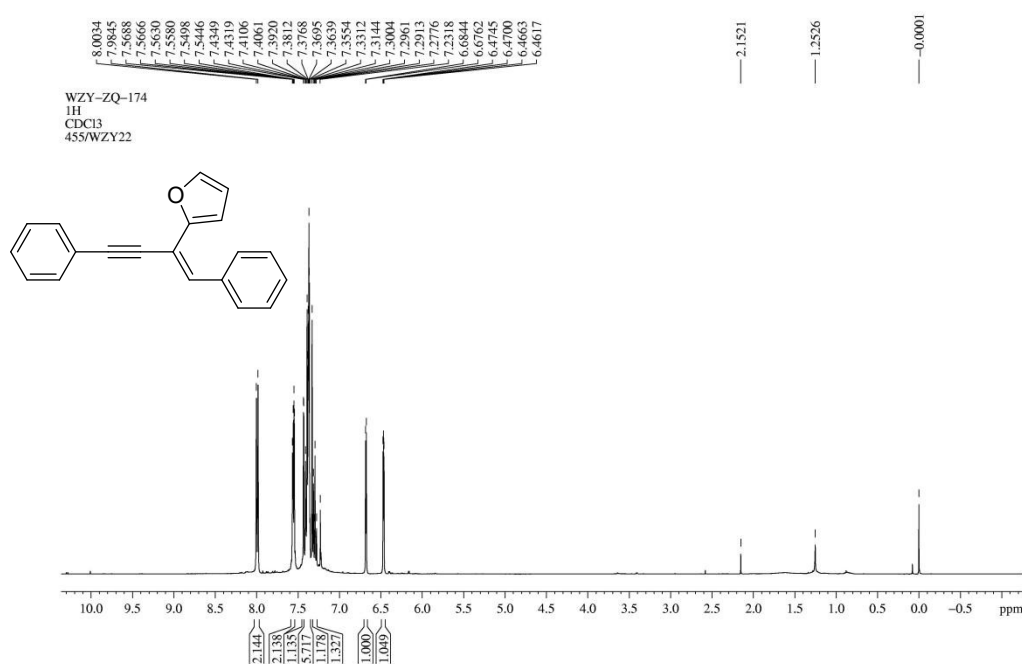

$^{13}\text{C}$  NMR spectrum of compound **3aa**

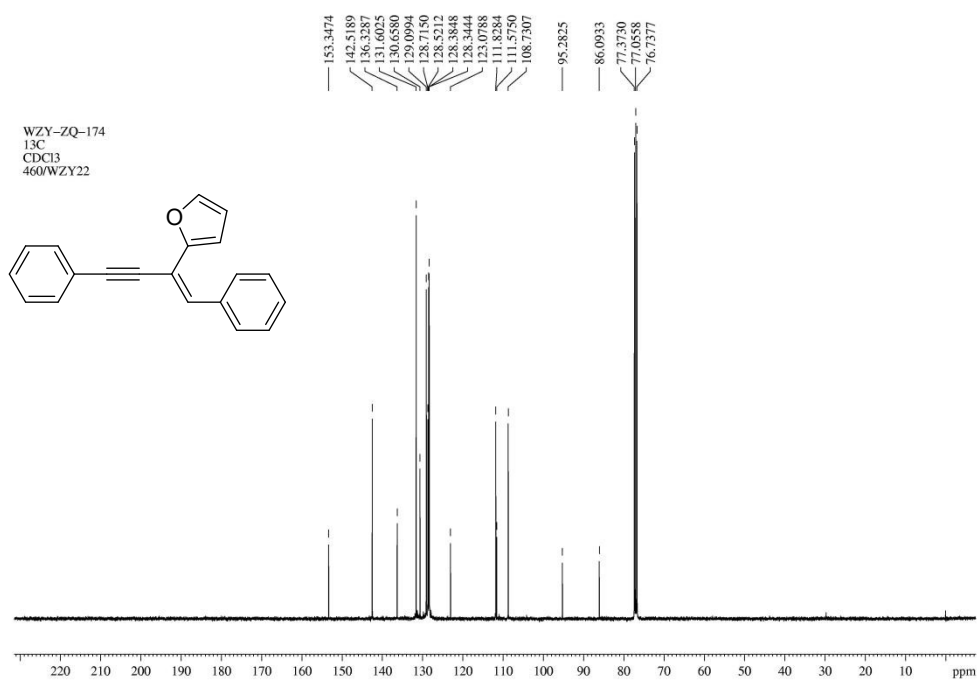

### <sup>1</sup>H NMR spectrum of compound **3ba**

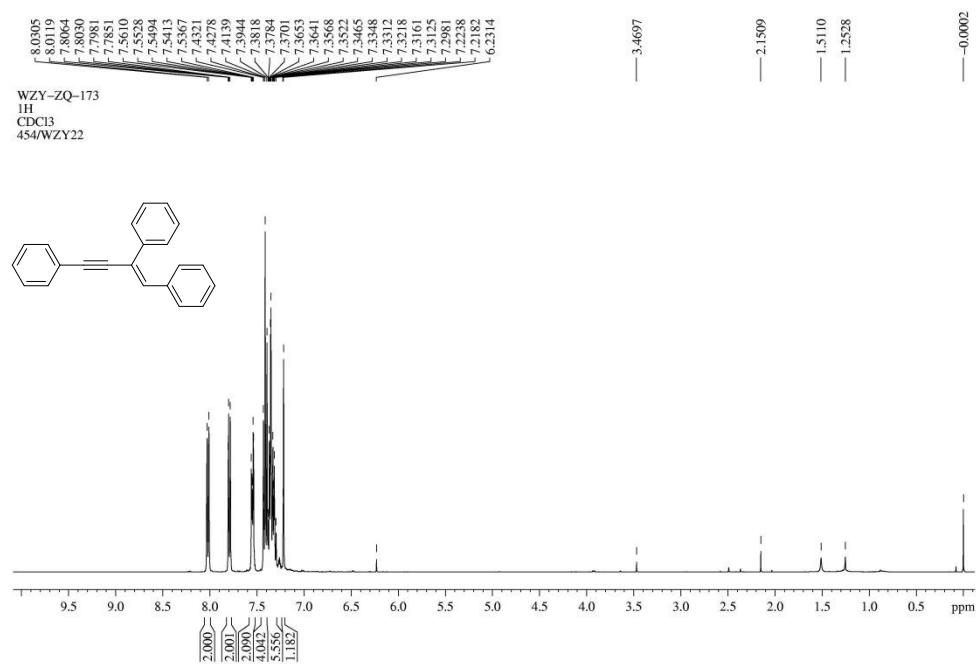

### <sup>13</sup>C NMR spectrum of compound **3ba**

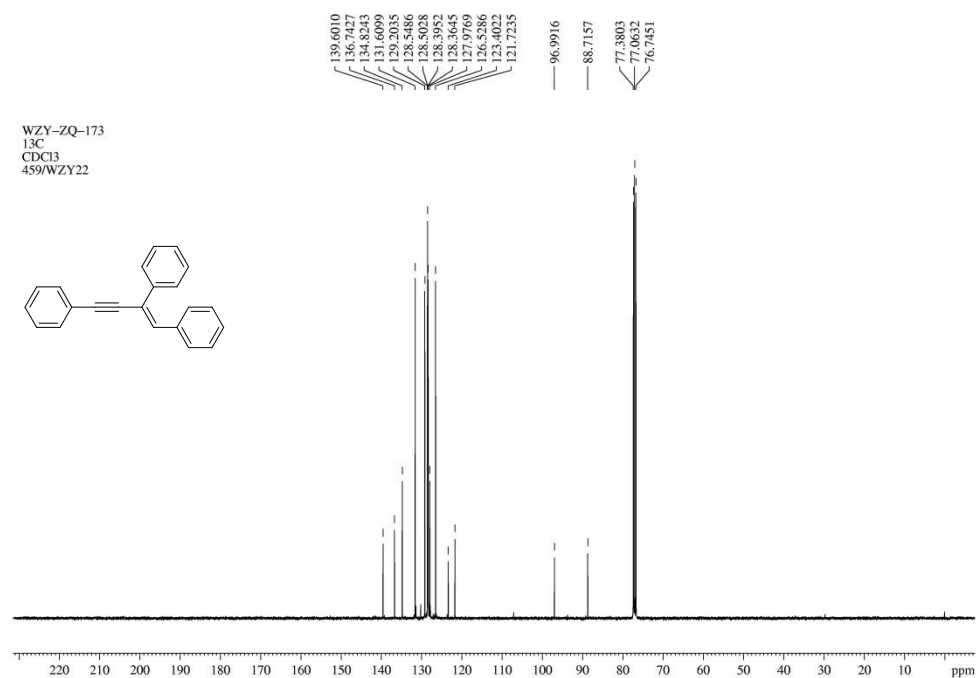

# HMBC NMR spectrum of compound **3ba**

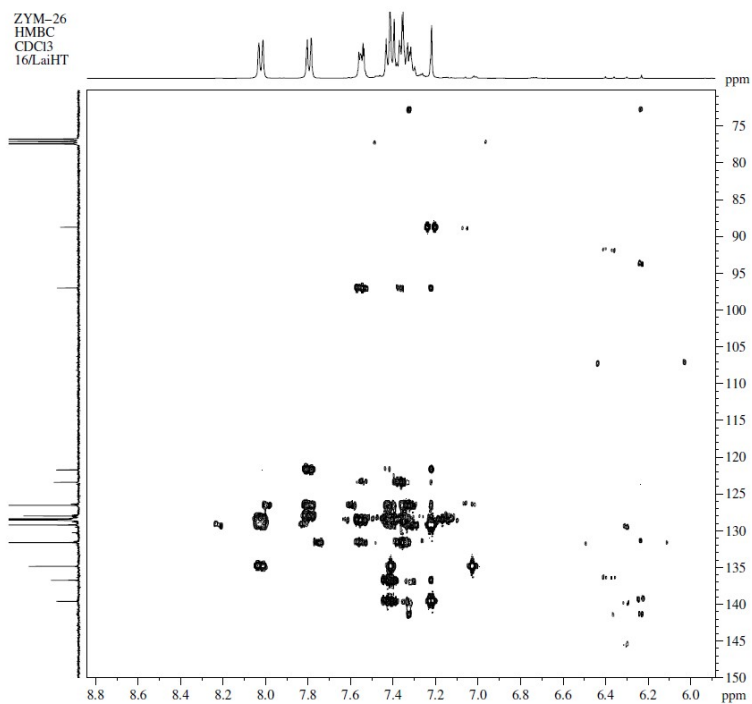

### <sup>1</sup>H NMR spectrum of compound **3ca**

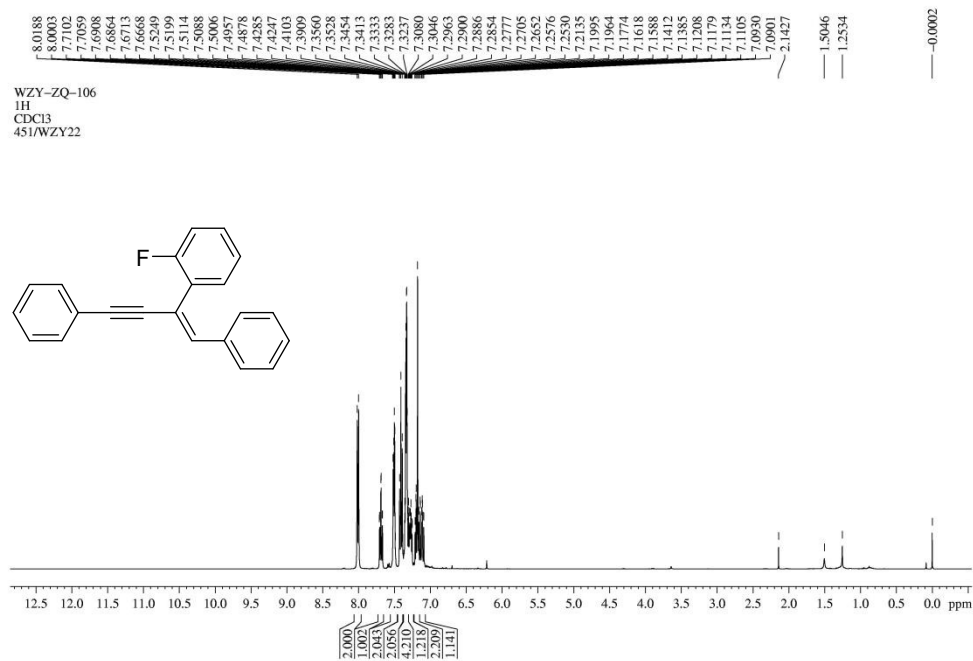

### <sup>13</sup>C NMR spectrum of compound **3ca**

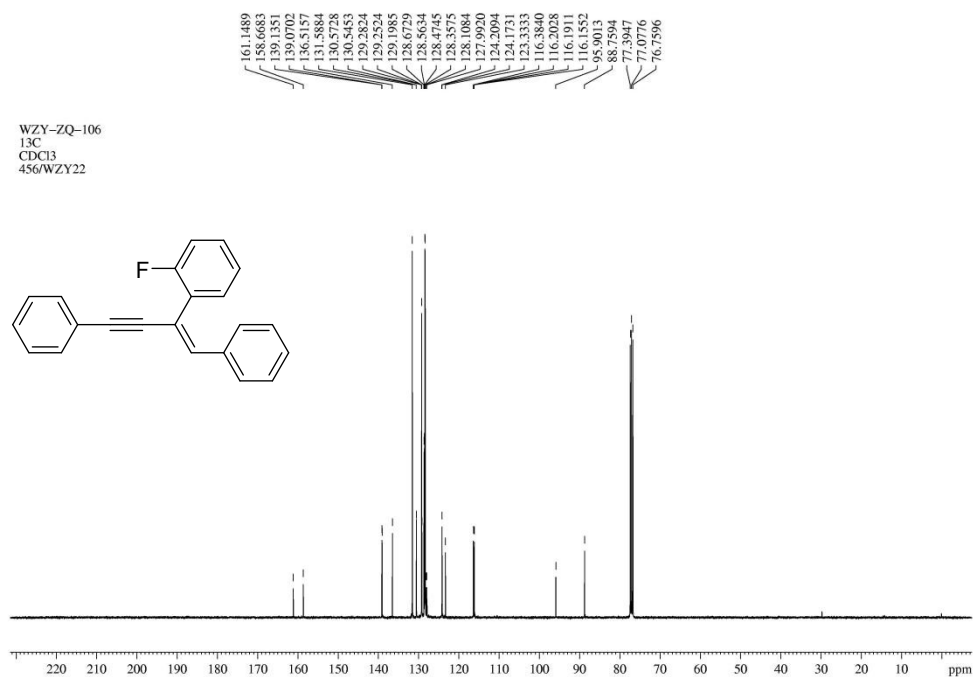

# <sup>1</sup>H NMR spectrum of compound **3da**

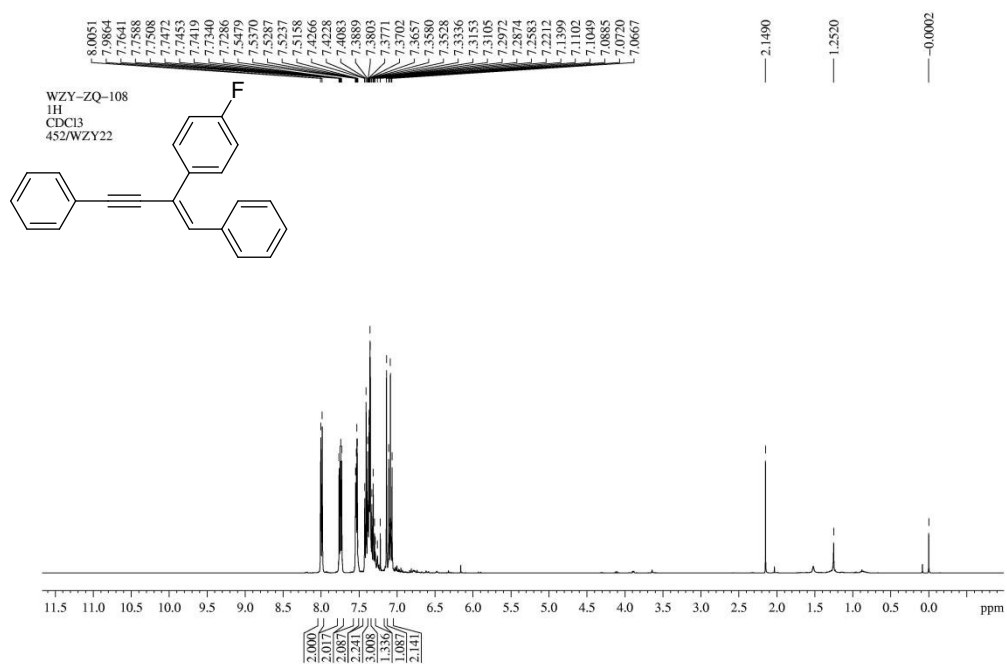

# <sup>13</sup>C NMR spectrum of compound **3da**

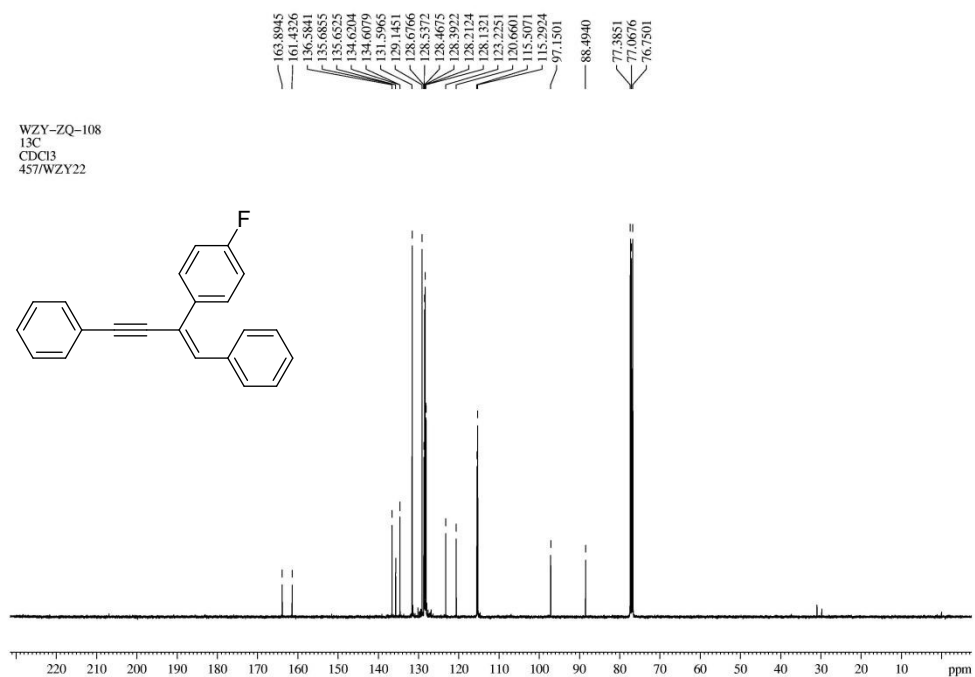

# <sup>1</sup>H NMR spectrum of compound **3ea**

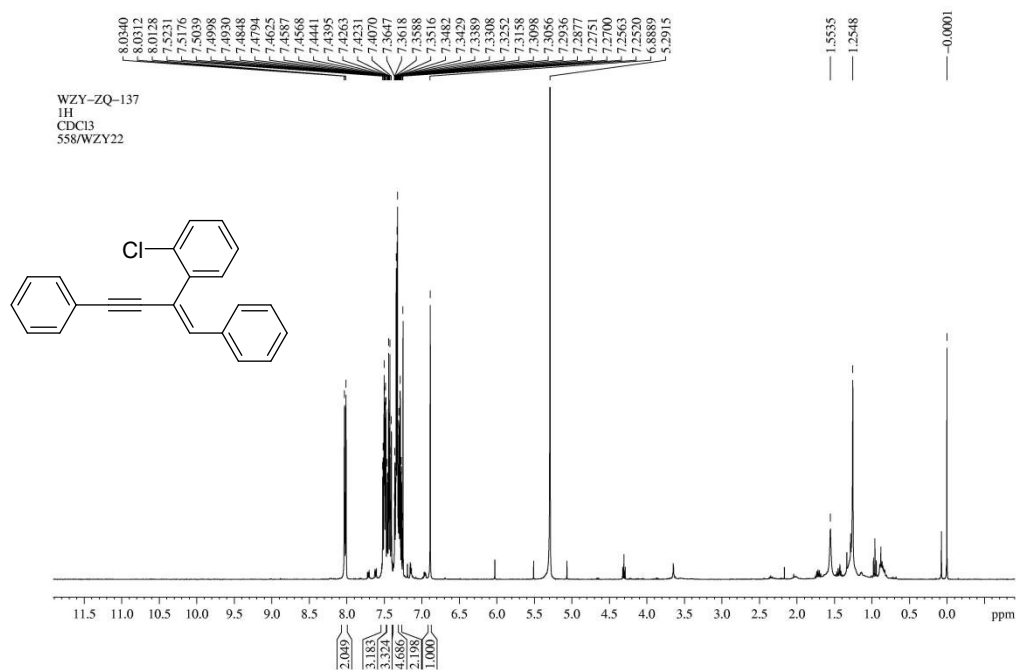

# <sup>13</sup>C NMR spectrum of compound **3ea**

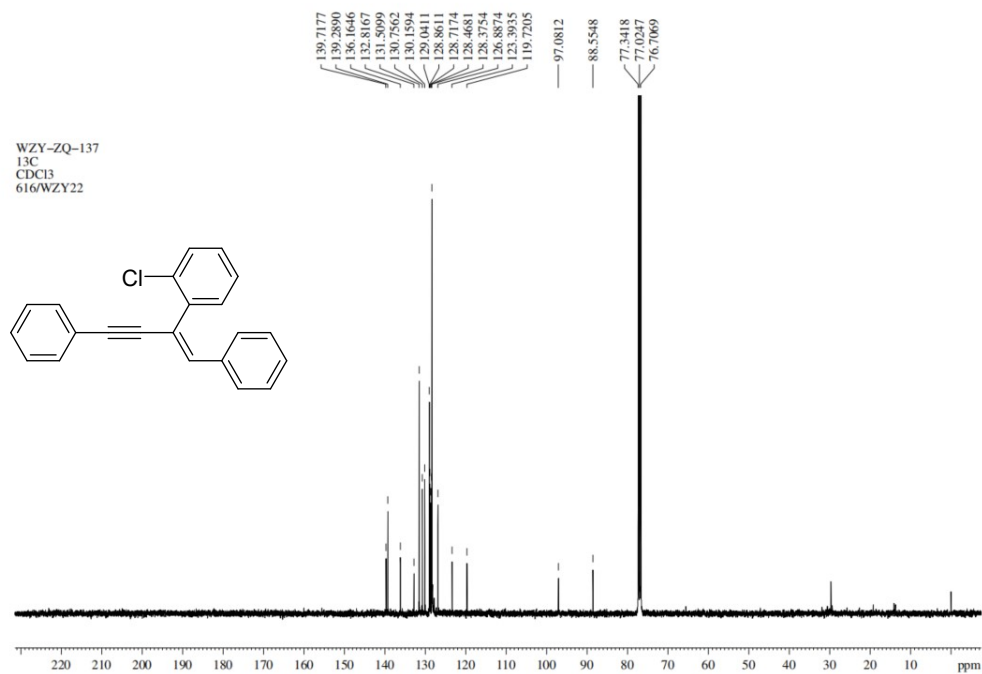

### <sup>1</sup>H NMR spectrum of compound **3fa**

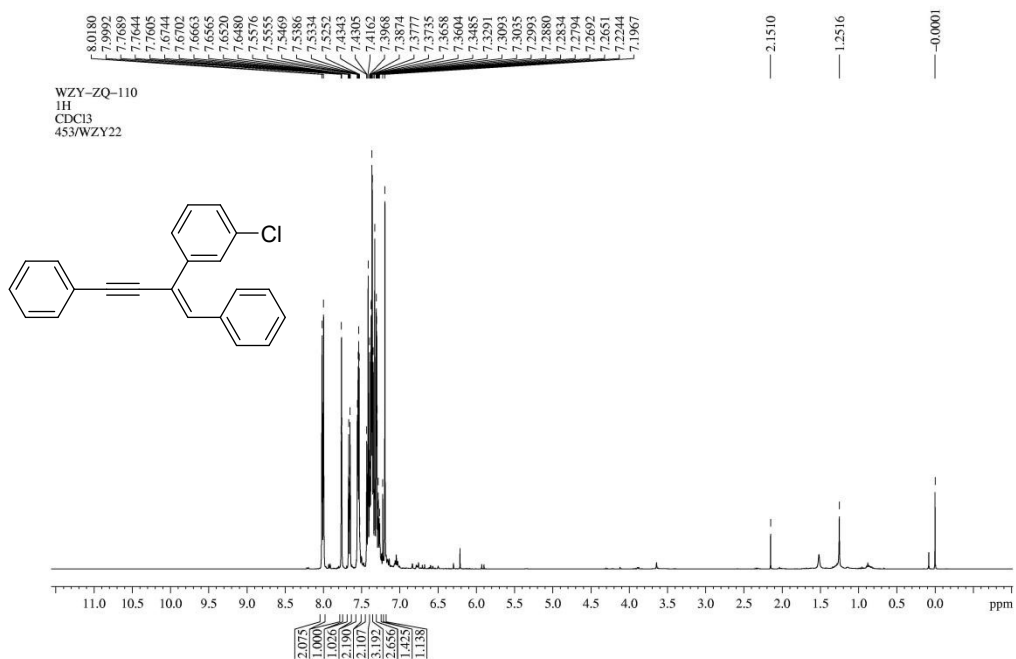

### <sup>13</sup>C NMR spectrum of compound **3fa**

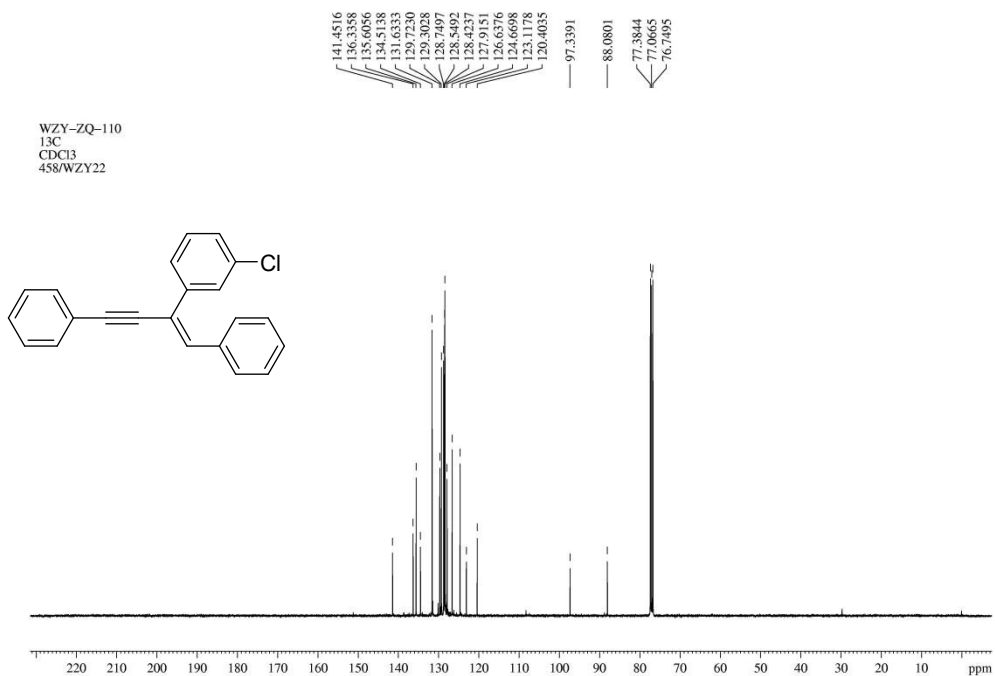



# <sup>1</sup>H NMR spectrum of compound **3ga**

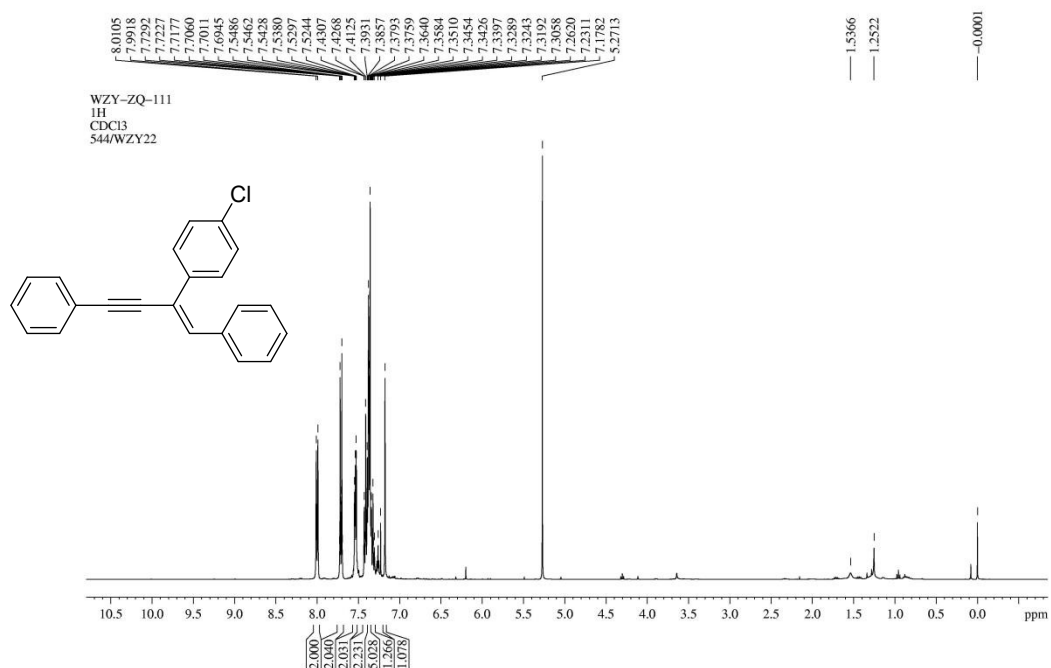

# <sup>13</sup>C NMR spectrum of compound **3ga**

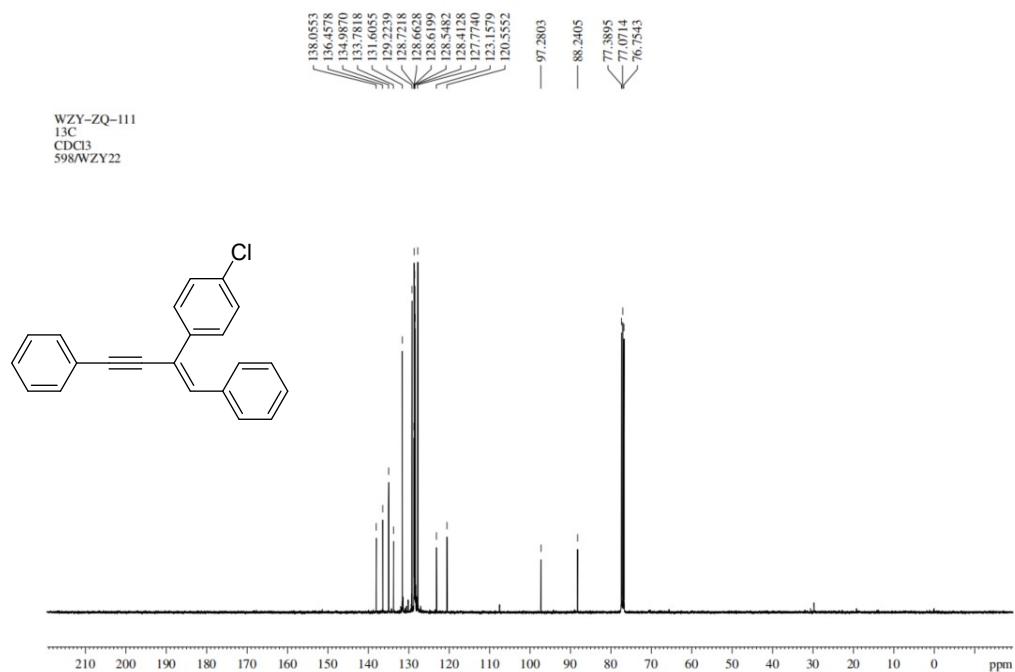

# <sup>1</sup>H NMR spectrum of compound **3ha**

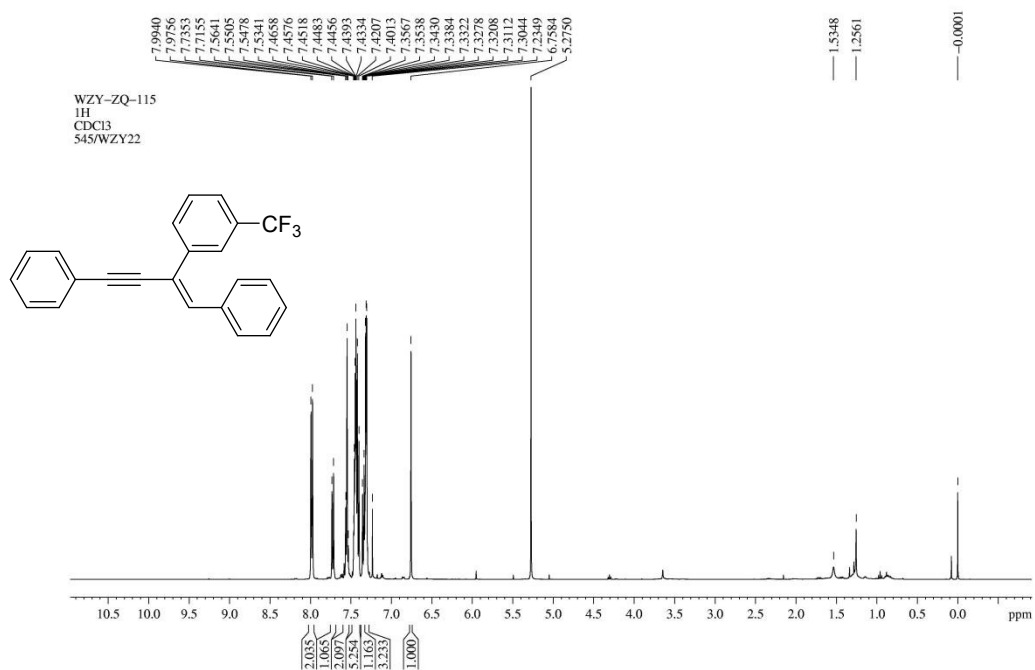

# <sup>13</sup>C NMR spectrum of compound **3ha**

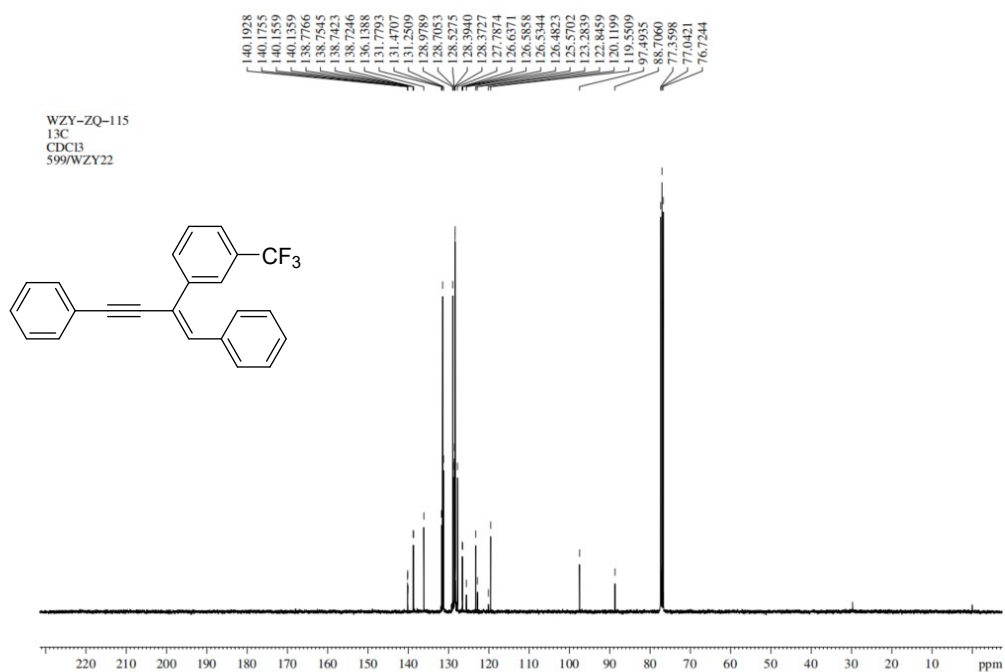

### <sup>1</sup>H NMR spectrum of compound **3ia**

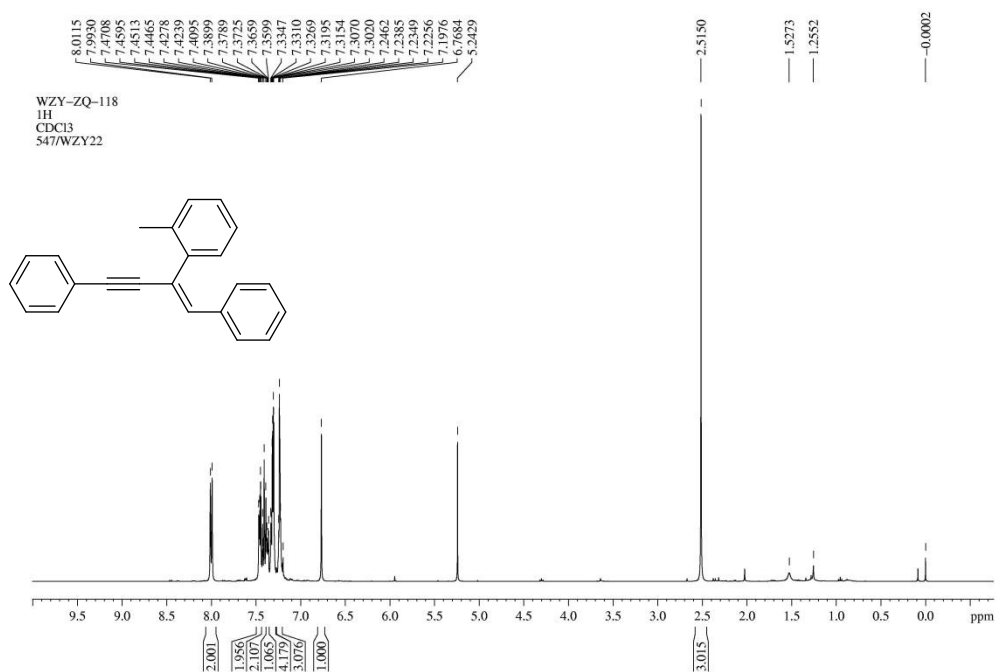

### <sup>13</sup>C NMR spectrum of compound **3ia**

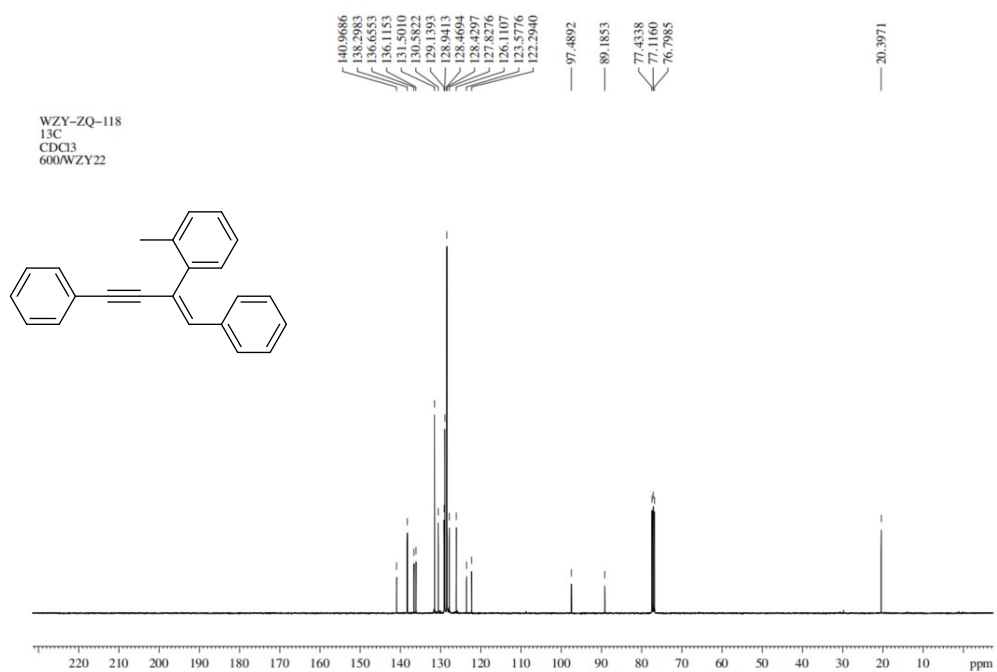

### <sup>1</sup>H NMR spectrum of compound **3ja**

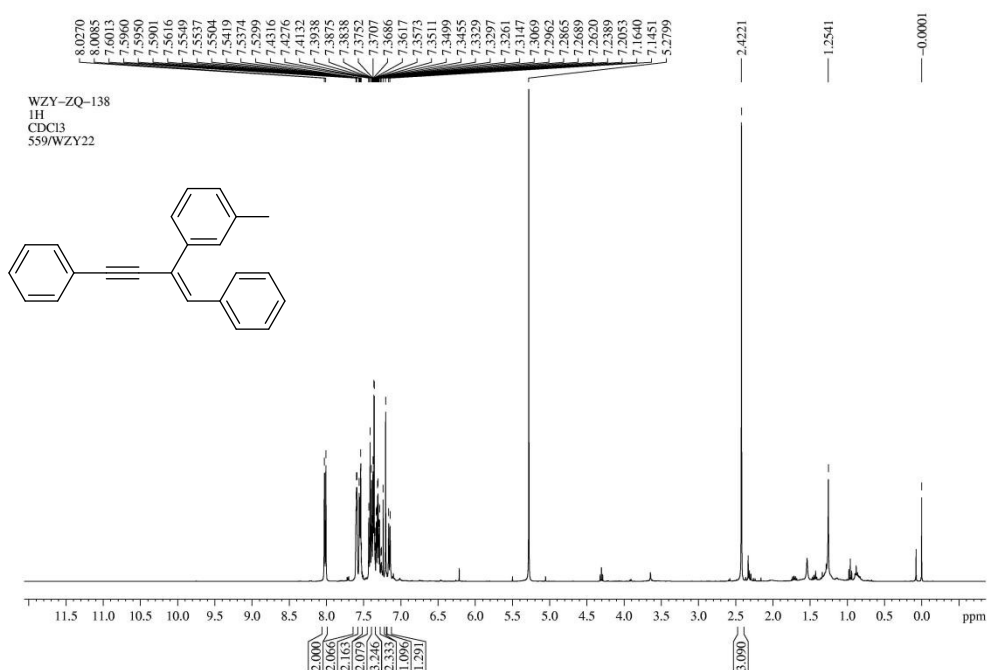

### <sup>13</sup>C NMR spectrum of compound **3ja**

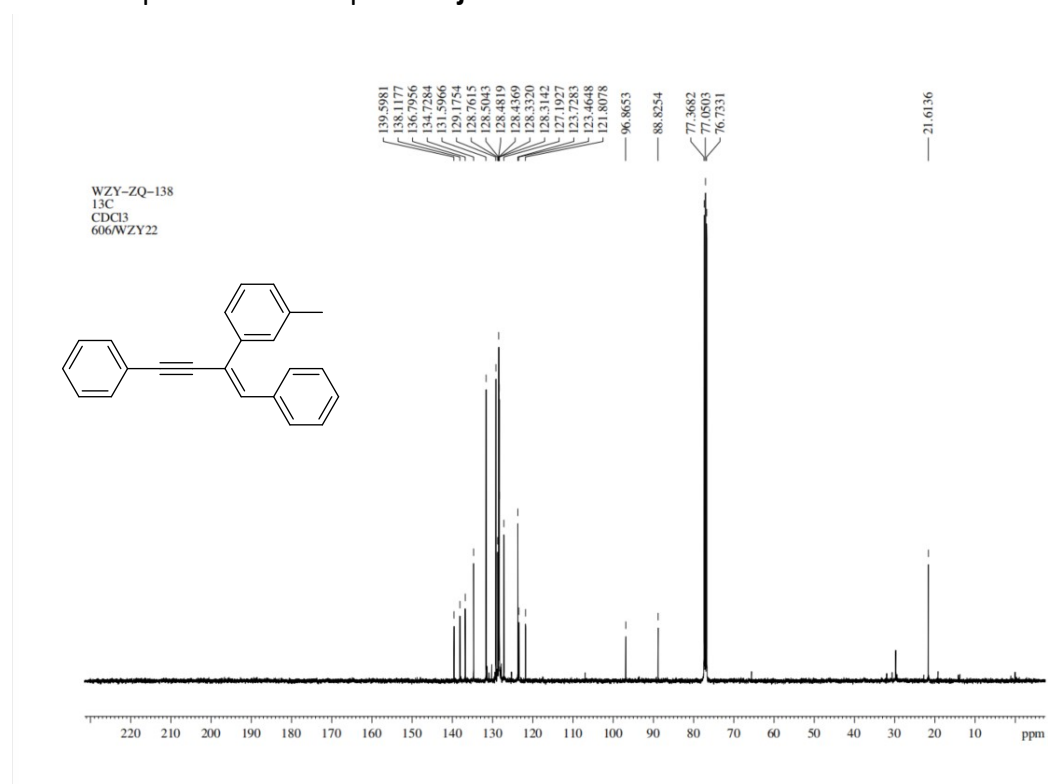

### <sup>1</sup>H NMR spectrum of compound **3ka**

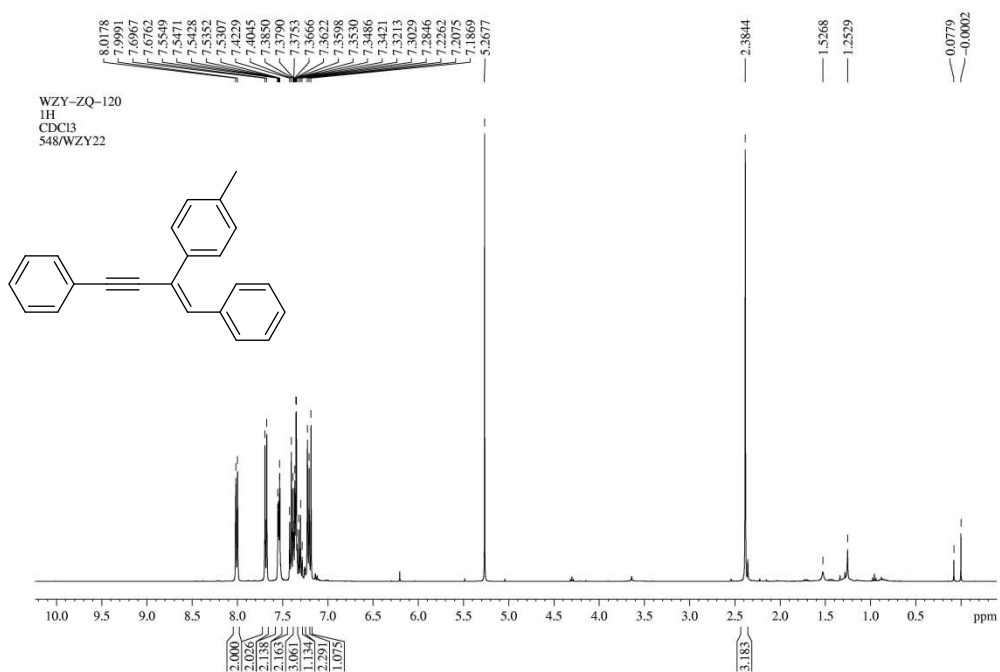

### <sup>13</sup>C NMR spectrum of compound **3ka**

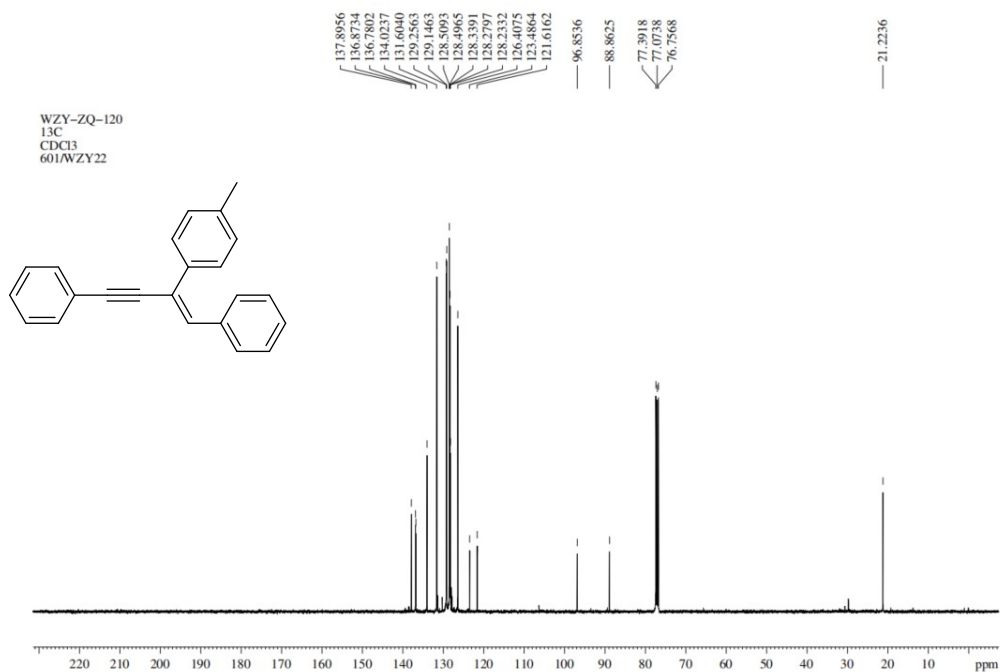

### <sup>1</sup>H NMR spectrum of compound **3la**

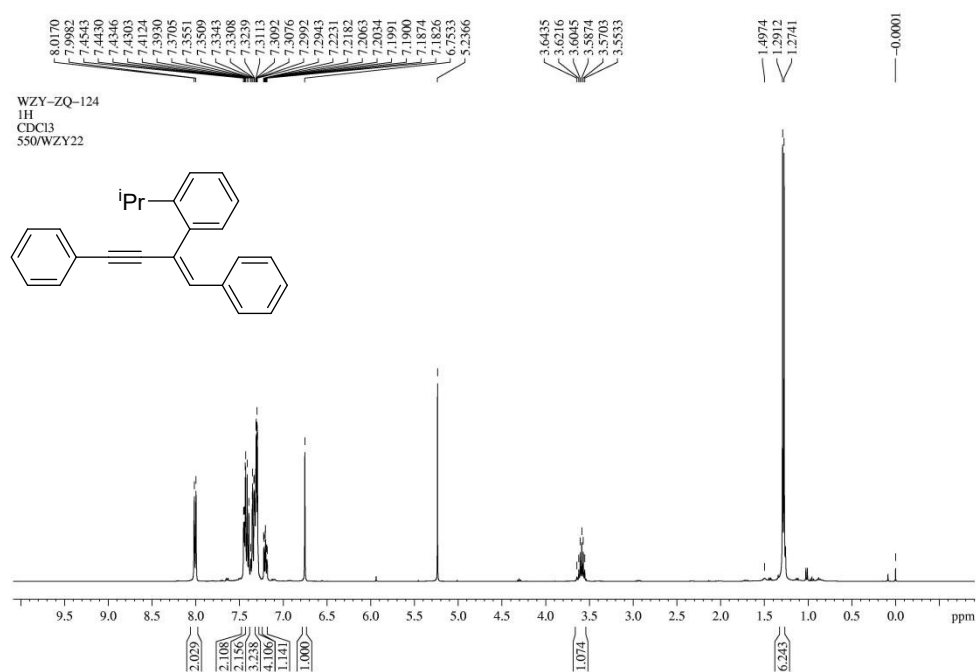

### <sup>13</sup>C NMR spectrum of compound **3la**

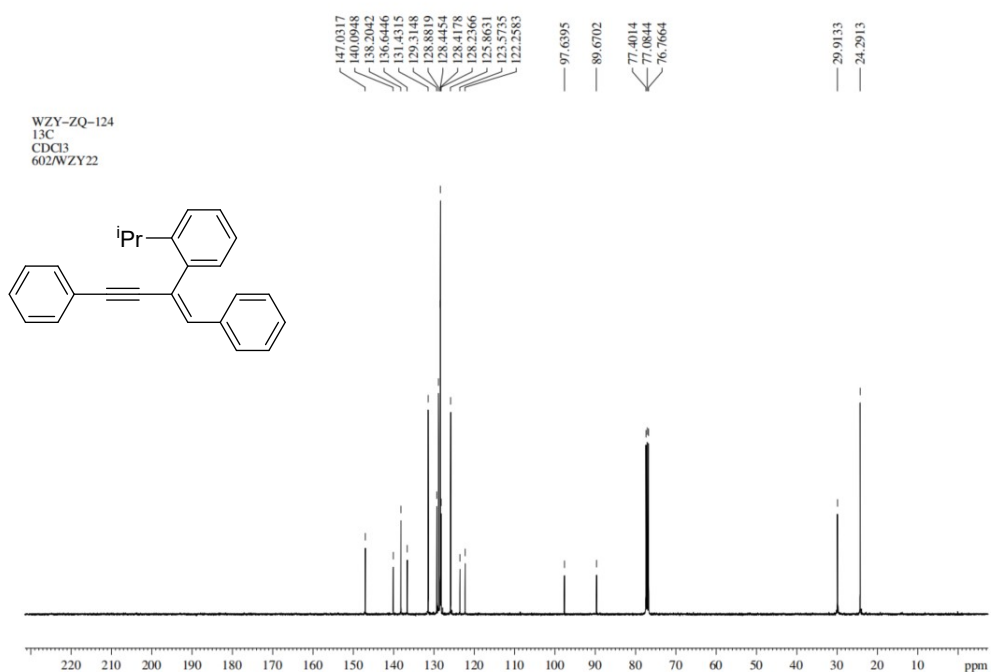

### <sup>1</sup>H NMR spectrum of compound **3ma**

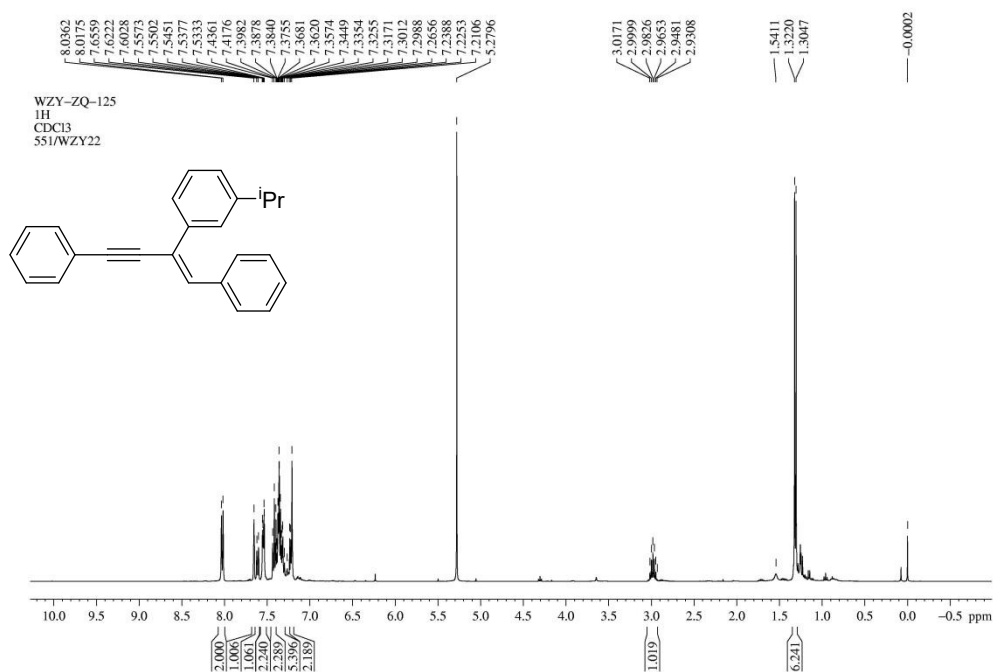

### <sup>13</sup>C NMR spectrum of compound **3ma**

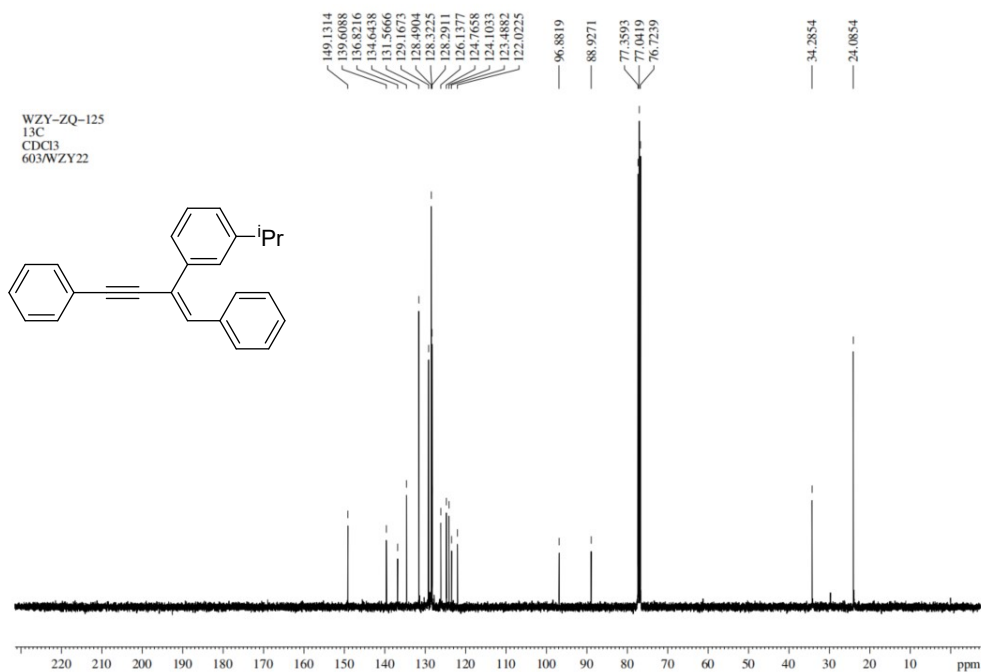

<sup>1</sup>H NMR spectrum of compound **3na**

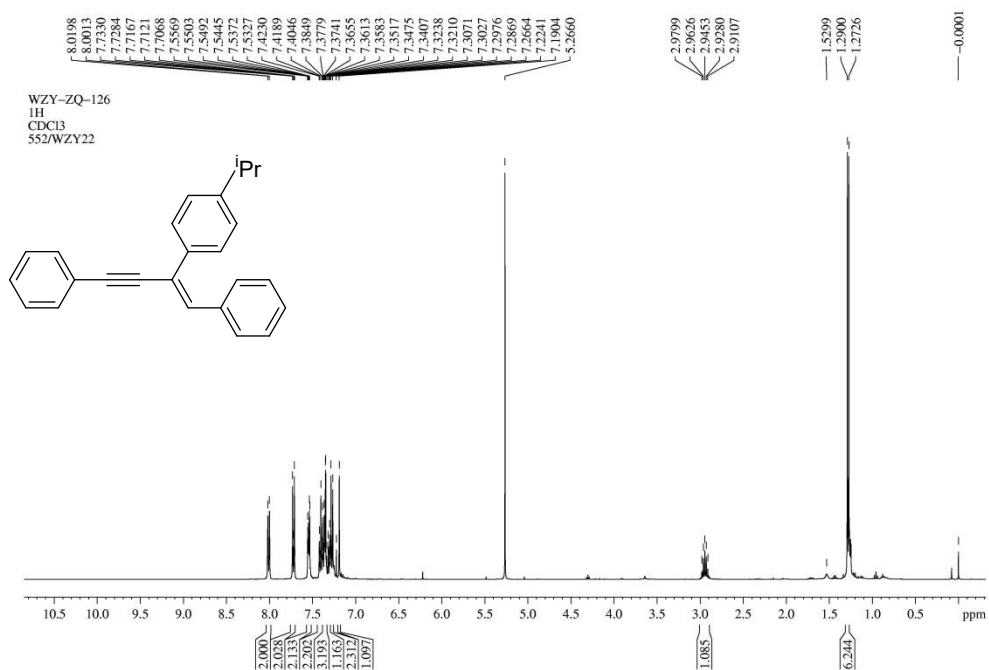

<sup>13</sup>C NMR spectrum of compound **3na**

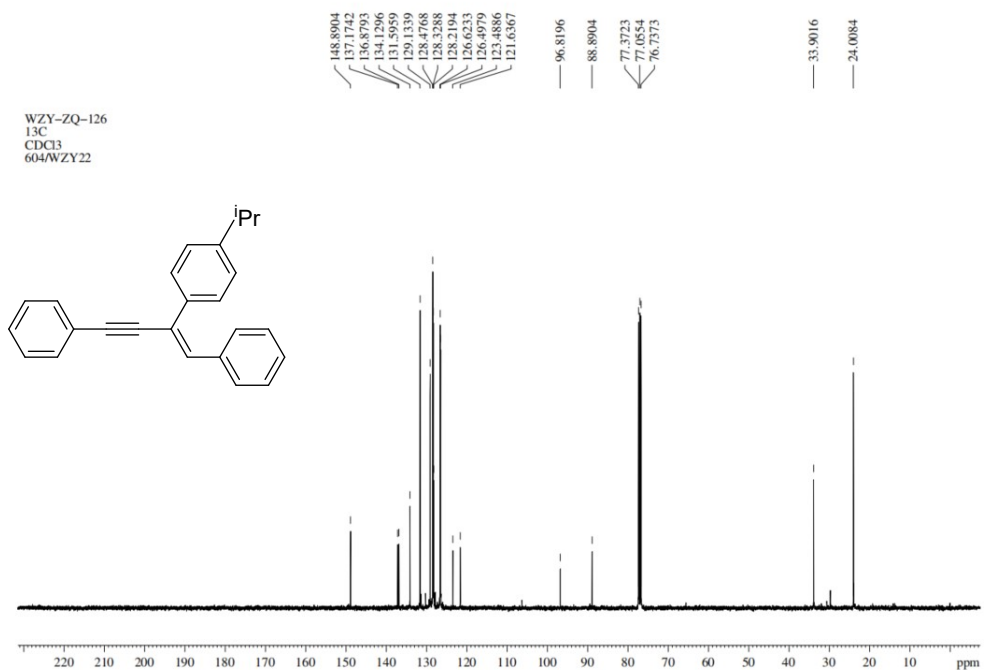



<sup>1</sup>H NMR spectrum of compound **30a**

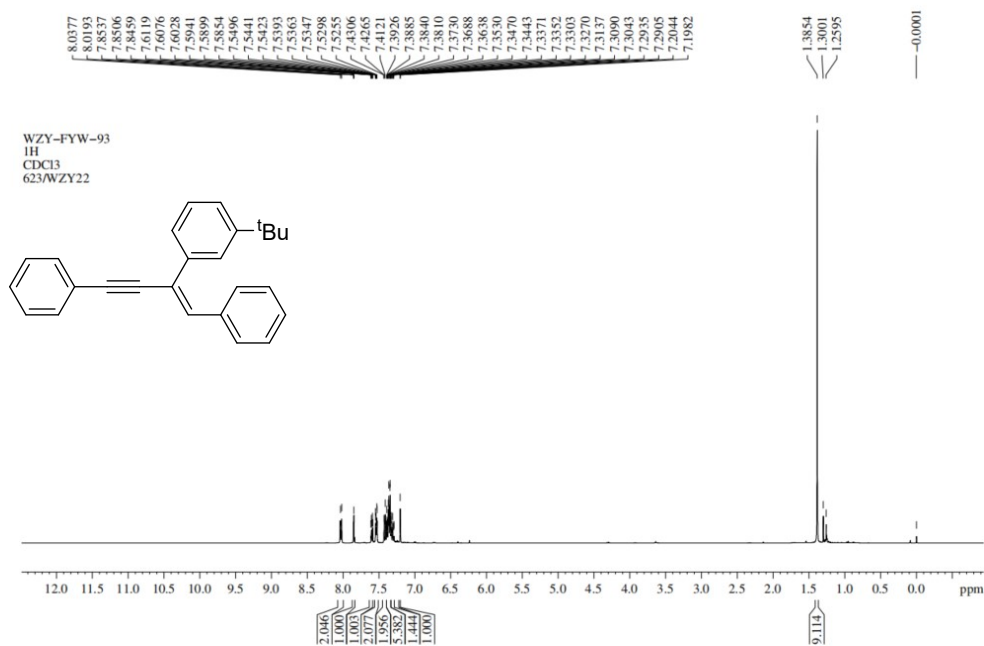

<sup>13</sup>C NMR spectrum of compound **30a**

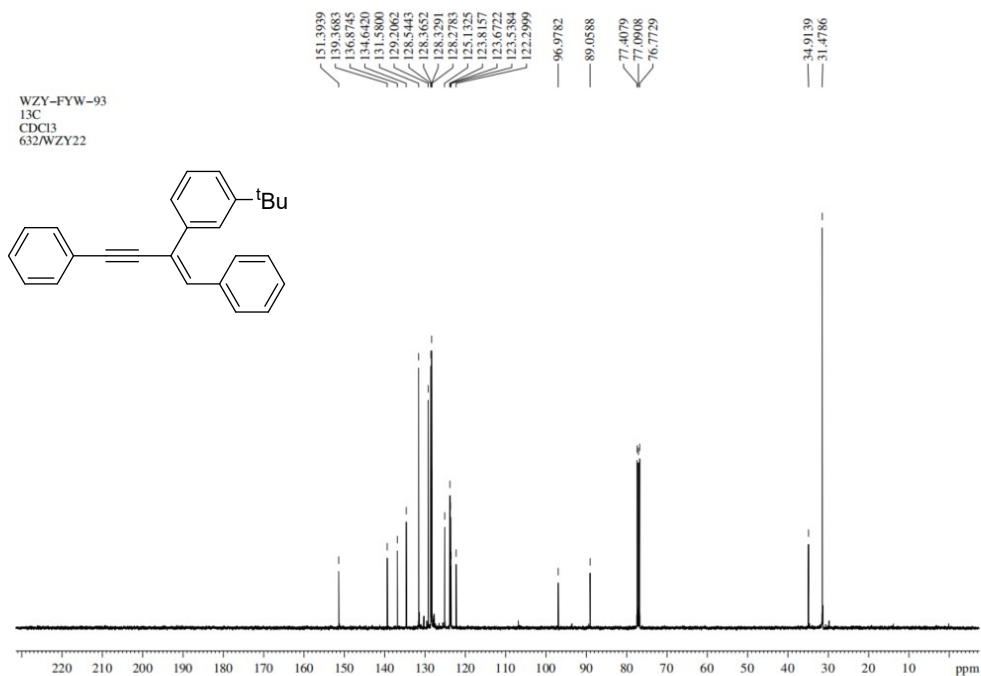

### <sup>1</sup>H NMR spectrum of compound **3pa**

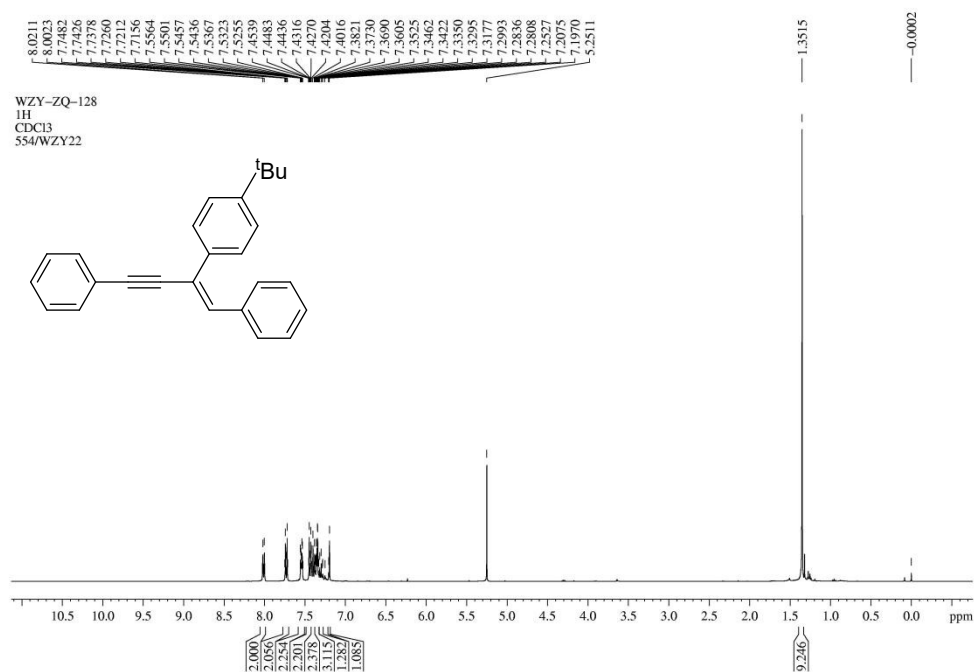

### <sup>13</sup>C NMR spectrum of compound **3pa**

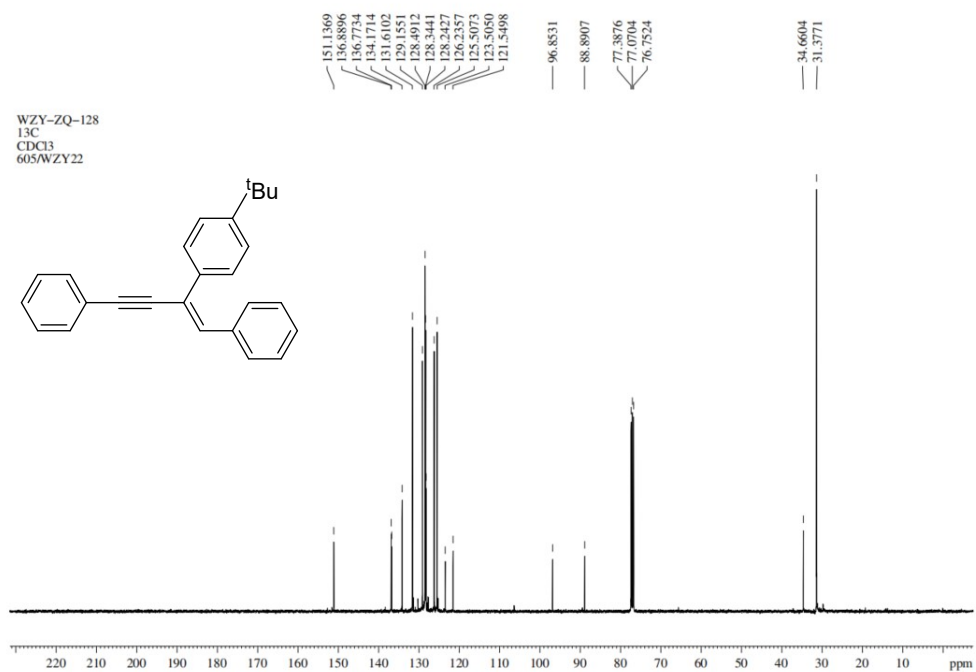

# <sup>1</sup>H NMR spectrum of compound **3qa**

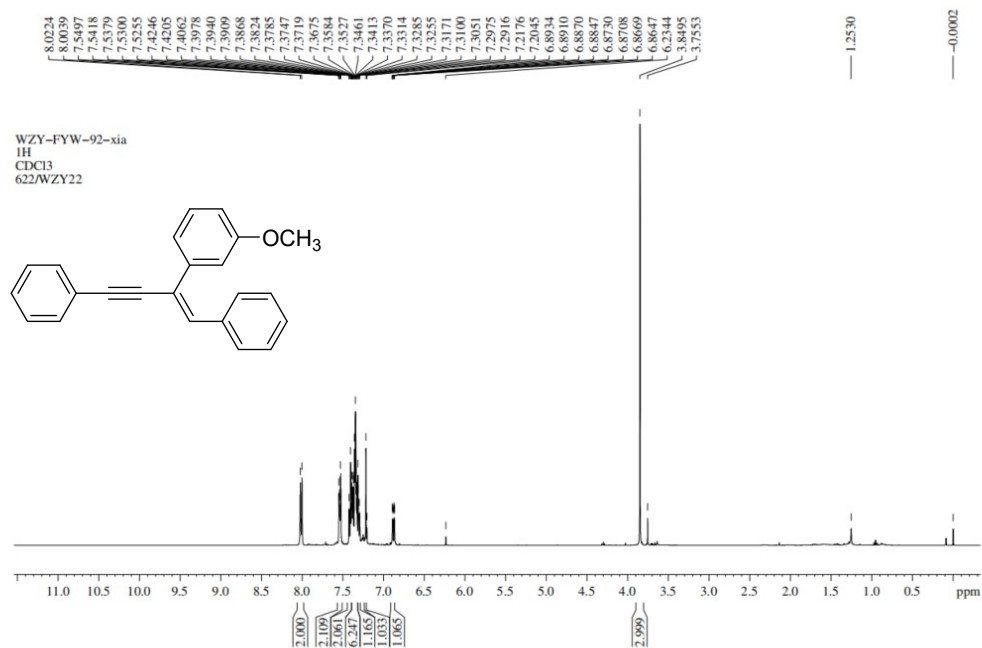

# <sup>13</sup>C NMR spectrum of compound **3qa**

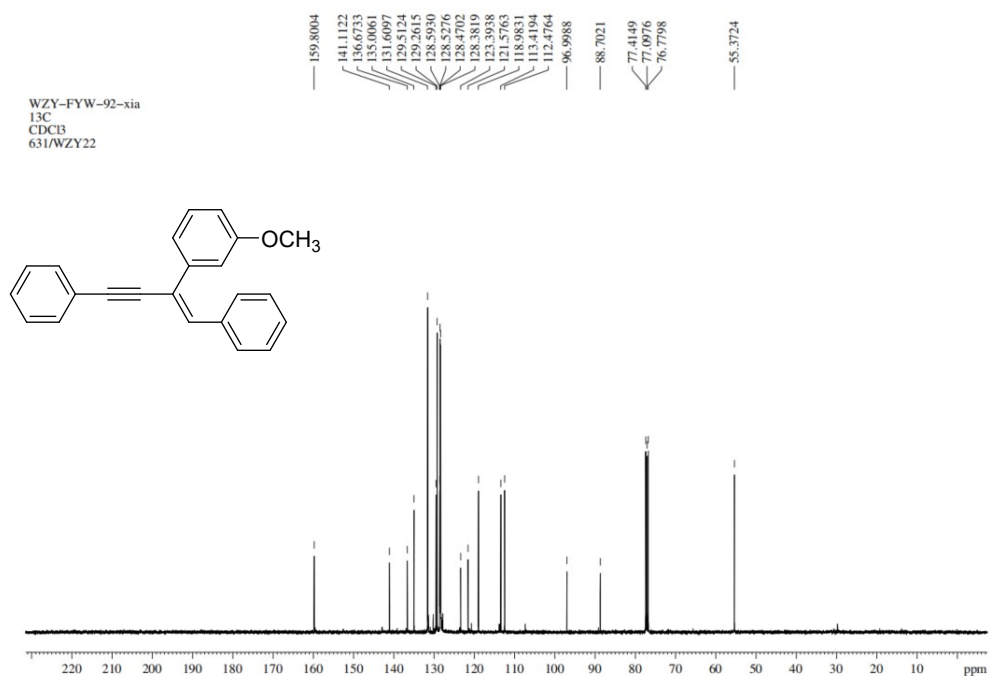

<sup>1</sup>H NMR spectrum of compound **3bb**

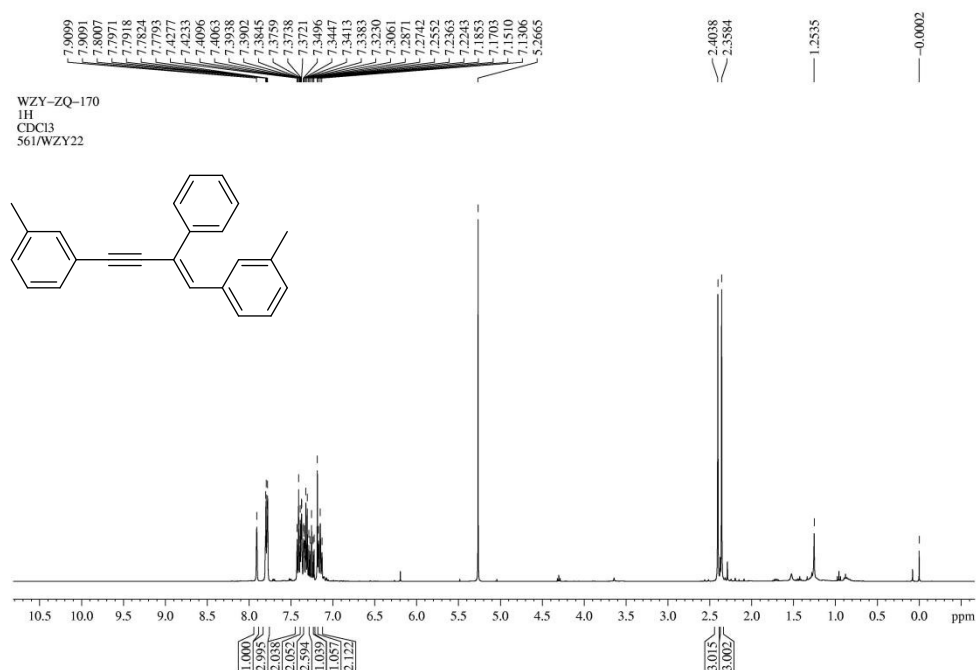

<sup>13</sup>C NMR spectrum of compound **3bb**

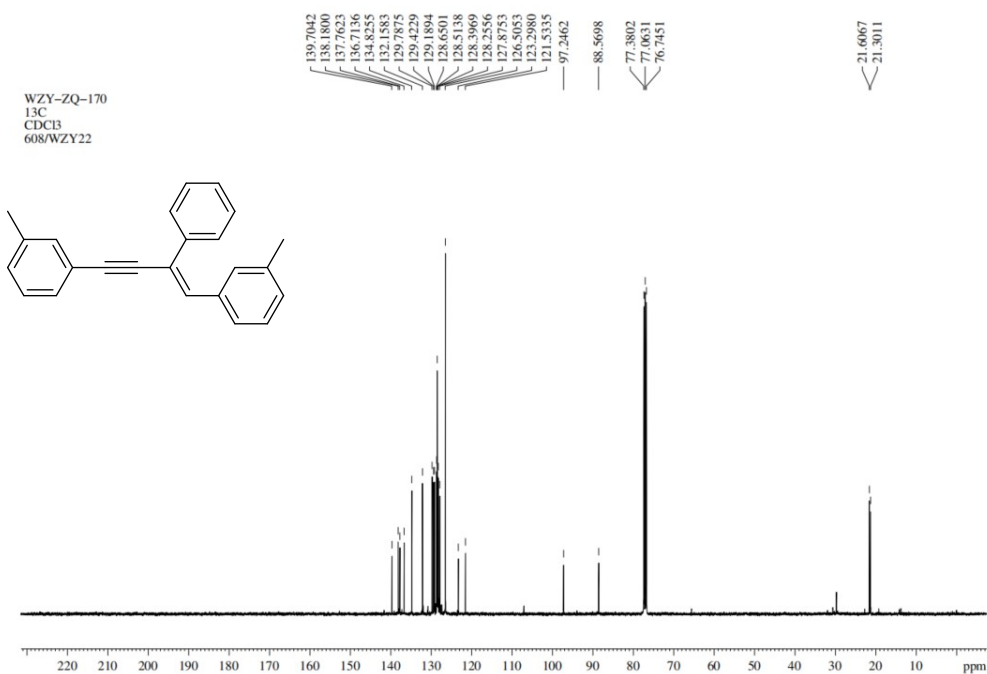



### <sup>1</sup>H NMR spectrum of compound **3bd**

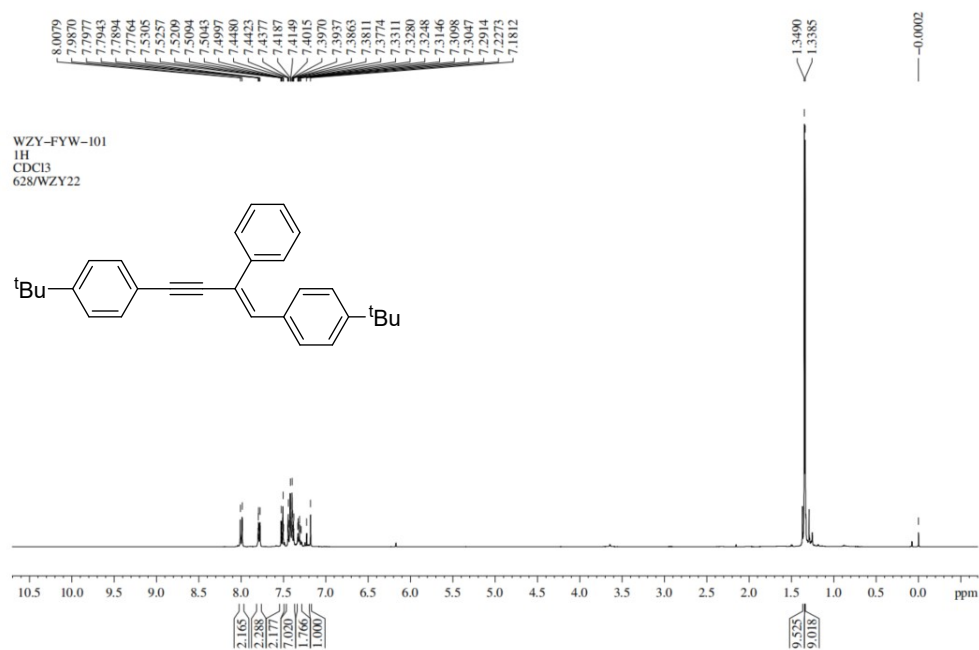

### <sup>13</sup>C NMR spectrum of compound **3bd**

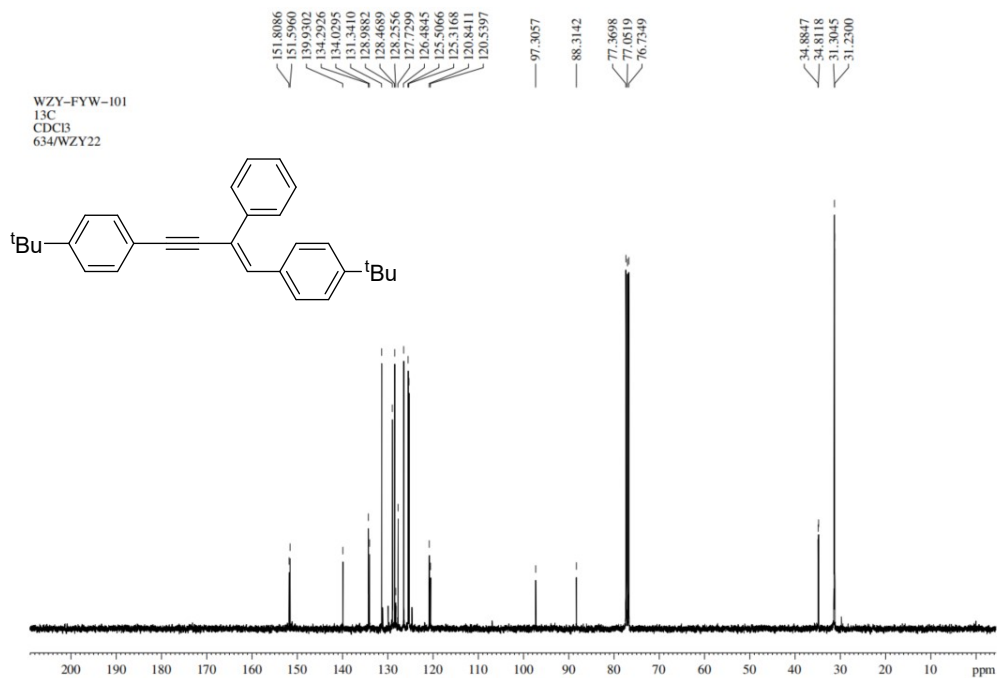

# <sup>1</sup>H NMR spectrum of compound **3be**

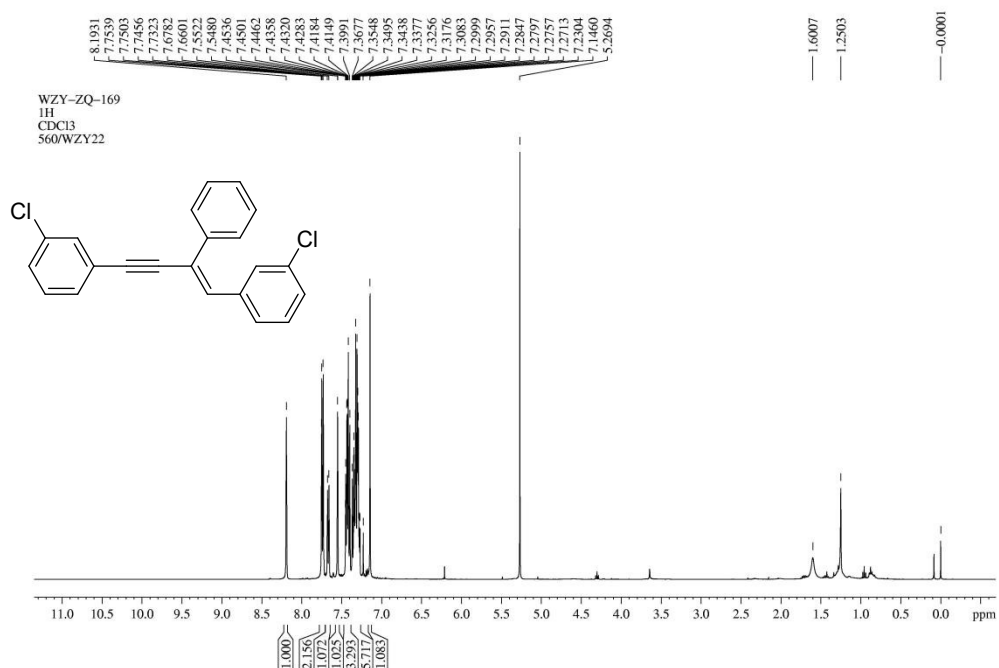

# <sup>13</sup>C NMR spectrum of compound **3be**

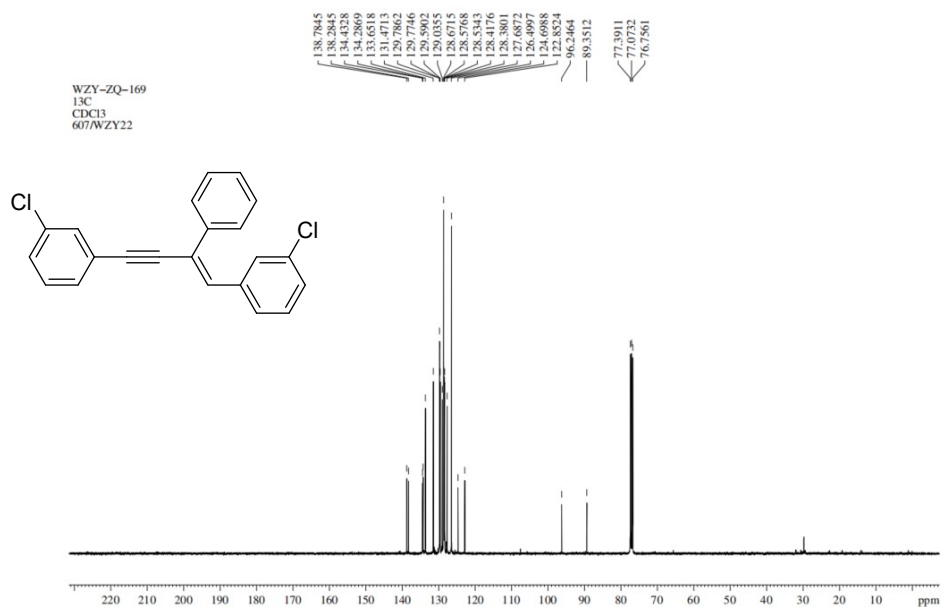

## 5. DFT Studies on the Plausible Reaction Mechanism

All theoretical calculations were performed using the GFN2-xTB methodology.<sup>[1]</sup> The SMD implicit solvation model was employed to replicate the solvent environment. The structures of reactants, intermediates and products were optimized, and the harmonic frequencies were computed to verify that the optimized structures resided at local minima on the potential surface.

**Table S1. The Gibbs free energy of reactants, intermediates, and product.**

| Species              | Gibbs free energy (Hartree) |
|----------------------|-----------------------------|
| Pd(OAc) <sub>2</sub> | -32.45542084                |
| PCy <sub>3</sub>     | -57.54048182                |
| A                    | -147.6266519                |
| H <sub>2</sub> O     | -5.078597137                |
| B                    | -134.1793709                |
| 2                    | -39.08468631                |
| C                    | -173.2529863                |
| 1                    | -25.77460565                |
| F                    | -24.43825213                |
| D                    | -174.6111935                |
| 3                    | -54.92873863                |
| E                    | -119.7219795                |
| HOAc                 | -14.43933338                |

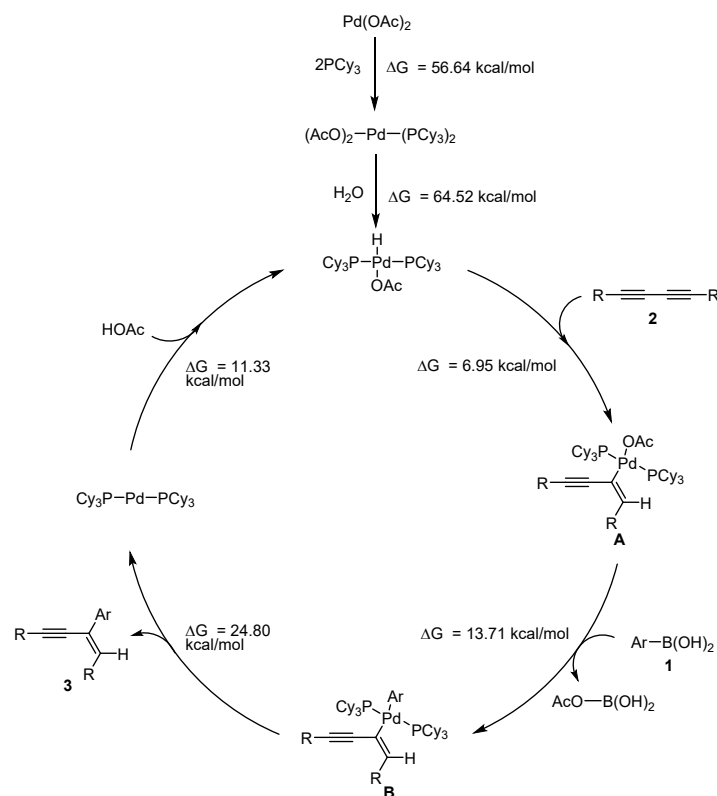

**Figure S1. Plausible Reaction Mechanism.**



**Cartesian coordinates**

|                      |                   |                   |                   |
|----------------------|-------------------|-------------------|-------------------|
| Pd(OAc) <sub>2</sub> |                   |                   |                   |
| Pd                   | 0.00069444940056  | -0.00167625284018 | -0.20208160921225 |
| O                    | 1.54524974775314  |                   | 0.39388673671607  |
| 1.03434245814641     |                   |                   |                   |
| C                    | 2.35520083199105  |                   | 0.12926614503322  |
| 0.09673665385131     |                   |                   |                   |
| O                    | -1.83761806921236 |                   | 0.20735300239023  |
| 0.60249797967283     |                   |                   |                   |
| C                    | -2.35345113392364 | -0.13262320811309 | -0.50368672614651 |
| O                    | 1.83851405376288  | -0.21031608047921 | -                 |
| 1.00801229392786     |                   |                   |                   |
| O                    | -1.54311587219430 | -0.39570515538224 | -1.43999161003034 |
| C                    | 3.83425666975275  |                   | 0.22016511727011  |
| 0.28353174623146     |                   |                   |                   |
| H                    | 4.11630817915220  |                   | -0.29266197259960 |
| 1.20017048541032     |                   |                   |                   |
| H                    | 4.34069063222791  | -0.21034638607512 | -                 |
| 0.57507227728889     |                   |                   |                   |
| H                    | 4.11194830445707  |                   | 1.26774326037716  |
| 0.38906126280736     |                   |                   |                   |
| C                    | -3.83290035754402 | -0.22294042642183 | -0.68843870808665 |
| H                    | -4.30342073356343 | 0.67405823793620  | -                 |
| 0.29273432085787     |                   |                   |                   |
| H                    | -4.06557826056285 | -0.35284452840154 | -1.74109056743083 |
| H                    | -4.20678920144790 | -1.07336385431528 | -0.12026695311414 |
| PCy <sub>3</sub>     |                   |                   |                   |
| P                    | -0.85144067100460 | -0.39627150689087 | -1.26052149519221 |
| C                    | -1.79169576452964 | 1.07675965146066  | -                 |
| 0.55304657702870     |                   |                   |                   |
| C                    | -2.05352020747798 |                   | 1.20423116495985  |
| 0.94519249629980     |                   |                   |                   |
| C                    | -1.18540638853885 | 2.36867615861030  | -                 |
| 1.10166970192833     |                   |                   |                   |
| H                    | -2.77119963741254 | 0.94532242639221  | -                 |
| 1.04097785485345     |                   |                   |                   |
| C                    | -2.98424292236856 |                   | 2.38977597437588  |
| 1.20500125736803     |                   |                   |                   |
| H                    | -1.12132558338494 |                   | 1.36430065666054  |
| 1.48514545722145     |                   |                   |                   |
| H                    | -2.52369726657300 |                   | 0.29708189698417  |
| 1.32669803457691     |                   |                   |                   |
| C                    | -2.10938525538843 | 3.55315107042526  | -                 |

|                  |                   |                   |                   |   |
|------------------|-------------------|-------------------|-------------------|---|
| 0.83286541029582 |                   |                   |                   |   |
| H                | -0.22135022706281 |                   | 2.55533230146431  | - |
| 0.62573489309236 |                   |                   |                   |   |
| H                | -1.01398336907026 |                   | 2.26381761026714  | - |
| 2.17609569985813 |                   |                   |                   |   |
| C                | -2.38163072824902 |                   | 3.68246805108478  |   |
| 0.66290512192572 |                   |                   |                   |   |
| H                | -3.16433806784123 |                   | 2.48485288674011  |   |
| 2.27901434035847 |                   |                   |                   |   |
| H                | -3.94714792667333 |                   | 2.20946300473684  |   |
| 0.71966853191053 |                   |                   |                   |   |
| H                | -1.65600270923720 |                   | 4.47254269234282  | - |
| 1.21186463517896 |                   |                   |                   |   |
| H                | -3.05433670264068 |                   | 3.40383908171391  | - |
| 1.36122942780498 |                   |                   |                   |   |
| H                | -3.06173612588924 |                   | 4.51743568247251  |   |
| 0.84865638313529 |                   |                   |                   |   |
| H                | -1.44483742044238 |                   | 3.89230131284852  |   |
| 1.18539211335669 |                   |                   |                   |   |
| C                | -1.66071681135050 | -1.83371056154181 | -0.34187705205865 |   |
| C                | -1.56799936582703 | -3.04792657660114 | -1.27207323270378 |   |
| C                | -1.14271164447803 |                   | -2.21919316630677 |   |
| 1.04138847276804 |                   |                   |                   |   |
| H                | -2.71812610743817 | -1.55046989660753 | -0.25890490755444 |   |
| C                | -2.35730037700927 | -4.23000324149492 | -0.71849447657981 |   |
| H                | -0.51897743580559 | -3.33265401234842 | -1.38838167660608 |   |
| H                | -1.94767367300656 | -2.77856926249694 | -2.26081394859781 |   |
| C                | -1.95249193187103 |                   | -3.38898780398710 |   |
| 1.60042066900120 |                   |                   |                   |   |
| H                | -0.09631415026581 |                   | -2.52107727393284 |   |
| 0.97332508822819 |                   |                   |                   |   |
| H                | -1.21036244559792 |                   | -1.37782444760046 |   |
| 1.73106944695853 |                   |                   |                   |   |
| C                | -1.86008134281179 |                   | -4.59806075674803 |   |
| 0.67561993480177 |                   |                   |                   |   |
| H                | -2.26161067066526 | -5.08753602168030 | -1.38896318650439 |   |
| H                | -3.41595313187967 | -3.96344358726278 | -0.66543445964478 |   |
| H                | -1.57957579463421 |                   | -3.64980422938961 |   |
| 2.59421753491573 |                   |                   |                   |   |
| H                | -2.99928501570531 |                   | -3.09176456545872 |   |
| 1.70377723332485 |                   |                   |                   |   |
| H                | -2.45063453854499 |                   | -5.42424519546959 |   |
| 1.07901003467594 |                   |                   |                   |   |
| H                | -0.82023703885463 |                   | -4.92842249383312 |   |

|                  |                   |                   |                   |  |
|------------------|-------------------|-------------------|-------------------|--|
| 0.61429328872662 |                   |                   |                   |  |
| C                | 0.91406052816751  | -0.38977502482511 | -                 |  |
| 0.59097190141401 |                   |                   |                   |  |
| C                | 1.80820228209735  | 0.22987903842483  | -                 |  |
| 1.67012387922322 |                   |                   |                   |  |
| C                | 1.23213448212845  | 0.25024208475830  |                   |  |
| 0.75655348119244 |                   |                   |                   |  |
| H                | 1.16493641192421  | -1.45796800805227 | -                 |  |
| 0.53809982740439 |                   |                   |                   |  |
| C                | 3.28259166622588  | 0.02564109531104  | -                 |  |
| 1.33329982052408 |                   |                   |                   |  |
| H                | 1.59845614175033  | 1.29841657267821  | -                 |  |
| 1.75160449443404 |                   |                   |                   |  |
| H                | 1.58198017456683  | -0.22569928296656 | -                 |  |
| 2.63750020253528 |                   |                   |                   |  |
| C                | 2.70476379523780  | 0.02716822024089  |                   |  |
| 1.10271694330816 |                   |                   |                   |  |
| H                | 1.04598833313713  | 1.32409570559761  |                   |  |
| 0.70619441698422 |                   |                   |                   |  |
| H                | 0.61135691159567  | -0.17180747436554 |                   |  |
| 1.54575831980321 |                   |                   |                   |  |
| C                | 3.60764980815720  | 0.62827181611370  |                   |  |
| 0.03013807298927 |                   |                   |                   |  |
| H                | 3.90703140310344  | 0.48534531182446  | -                 |  |
| 2.10332645814668 |                   |                   |                   |  |
| H                | 3.50500700190286  | -1.04454618609675 | -                 |  |
| 1.31773797526536 |                   |                   |                   |  |
| H                | 2.92634702197284  | 0.47993708295654  |                   |  |
| 2.07286241114805 |                   |                   |                   |  |
| H                | 2.90140587115553  | -1.04508232955776 |                   |  |
| 1.18312409970673 |                   |                   |                   |  |
| H                | 4.65610039192199  | 0.44722881858378  |                   |  |
| 0.27973874445187 |                   |                   |                   |  |
| H                | 3.45505578411407  | 1.70986092102134  | -                 |  |
| 0.00684661081069 |                   |                   |                   |  |
| A                |                   |                   |                   |  |
| Pd               | -0.59228337392219 | -0.89724846417981 | -0.29642052085844 |  |
| O                | -0.03979234153322 | -0.66402590570118 | -2.23014202626152 |  |
| C                | 0.09137053472154  | 0.59072483286488  | -                 |  |
| 2.33742439898895 |                   |                   |                   |  |
| O                | 0.57183225555191  | 0.56747807116790  |                   |  |
| 1.61444805899997 |                   |                   |                   |  |
| C                | -0.28700531900698 | -0.08660631059462 |                   |  |

|                  |                   |                   |                   |
|------------------|-------------------|-------------------|-------------------|
| 2.21118489102235 |                   |                   |                   |
| O                |                   | -1.00737404136642 | -0.97648318032803 |
| 1.67171323711447 |                   |                   |                   |
| O                | -0.21945478600849 | 1.39511519436002  | -                 |
| 1.45379556945948 |                   |                   |                   |
| C                | -0.53148630551573 |                   | 0.13364943831549  |
| 3.70977299330813 |                   |                   |                   |
| H                | -1.05636282526113 |                   | 1.07675783585155  |
| 3.84577327471652 |                   |                   |                   |
| H                | -1.13336523902123 |                   | -0.67514368043083 |
| 4.11452846149605 |                   |                   |                   |
| H                | 0.41764577484230  |                   | 0.19772217637540  |
| 4.23556999541319 |                   |                   |                   |
| C                | 0.65201166148476  | 1.09707950670351  | -                 |
| 3.67462937246724 |                   |                   |                   |
| H                | 0.70936216250450  | 0.28621728155863  | -                 |
| 4.39561657545698 |                   |                   |                   |
| H                | 0.01660880510509  | 1.89059110655238  | -                 |
| 4.05904475903667 |                   |                   |                   |
| H                | 1.64540407029197  | 1.50765161088770  | -                 |
| 3.50986402280614 |                   |                   |                   |
| P                | -2.99113528496452 | -0.77775891334643 | -0.60550665894126 |
| P                | 1.43232108071549  |                   | -2.09303610916695 |
| 0.04935466880654 |                   |                   |                   |
| C                | 1.49697386214947  |                   | -2.93369553950469 |
| 1.72214078247456 |                   |                   |                   |
| C                | 0.35732511627814  |                   | -3.94429808567096 |
| 1.85201540279231 |                   |                   |                   |
| C                | 2.80788579421760  |                   | -3.56443335893958 |
| 2.18771899603533 |                   |                   |                   |
| H                | 1.28099339274047  |                   | -2.10219044926227 |
| 2.40735065931105 |                   |                   |                   |
| C                | 0.20629396815705  |                   | -4.38524929504870 |
| 3.30468061688056 |                   |                   |                   |
| H                | 0.57211546805483  |                   | -4.82453870128834 |
| 1.24482608433543 |                   |                   |                   |
| H                | -0.56903384534264 |                   | -3.48807314125547 |
| 1.49294602227306 |                   |                   |                   |
| C                | 2.66155610285767  |                   | -4.02215001497833 |
| 3.64090365632756 |                   |                   |                   |
| H                | 3.06166184336073  |                   | -4.42410490545517 |
| 1.56801999670581 |                   |                   |                   |
| H                | 3.62209589434892  |                   | -2.84177370339876 |
| 2.13216034951577 |                   |                   |                   |

|                  |                   |                   |   |
|------------------|-------------------|-------------------|---|
| C                | 1.50926124172477  | -5.01020883769327 |   |
| 3.79500195921749 |                   |                   |   |
| H                | -0.60993471443940 | -5.10472727224651 |   |
| 3.39233476650193 |                   |                   |   |
| H                | -0.03944920696498 | -3.51909054816826 |   |
| 3.92187621341484 |                   |                   |   |
| H                | 3.59453419370349  | -4.48300347561122 |   |
| 3.97348265138470 |                   |                   |   |
| H                | 2.47482693710833  | -3.15111001695991 |   |
| 4.27328110668311 |                   |                   |   |
| H                | 1.41336388549293  | -5.30551714685398 |   |
| 4.84178456162856 |                   |                   |   |
| H                | 1.72245314588872  | -5.90894949402368 |   |
| 3.21187840814403 |                   |                   |   |
| C                | 3.06360865350158  | -1.17243638428609 | - |
| 0.01536646468538 |                   |                   |   |
| C                | 4.29262646909996  | -1.94460182543509 | - |
| 0.49508697927900 |                   |                   |   |
| C                | 2.89722565445561  | 0.08046343109507  | - |
| 0.87416005378135 |                   |                   |   |
| H                | 3.22321409549834  | -0.84170577259970 |   |
| 1.01966506181008 |                   |                   |   |
| C                | 5.53885333483876  | -1.06310731269878 | - |
| 0.40031219380500 |                   |                   |   |
| H                | 4.15221415272688  | -2.24213837226372 | - |
| 1.53588105101515 |                   |                   |   |
| H                | 4.45481933345013  | -2.84003527850832 |   |
| 0.10422723321963 |                   |                   |   |
| C                | 4.13745454596693  | 0.96349329611899  | - |
| 0.80015265918652 |                   |                   |   |
| H                | 2.71732617455302  | -0.21016662917180 | - |
| 1.91309086436279 |                   |                   |   |
| H                | 2.03535258766801  | 0.64744743200940  | - |
| 0.51807844469731 |                   |                   |   |
| C                | 5.37655569431548  | 0.19454991925911  | - |
| 1.24666200298918 |                   |                   |   |
| H                | 6.41248511446666  | -1.62886036114878 | - |
| 0.73367246302705 |                   |                   |   |
| H                | 5.70278307188485  | -0.77728380616274 |   |
| 0.64177874349545 |                   |                   |   |
| H                | 3.99767215338454  | 1.84949829931097  | - |
| 1.42504418258595 |                   |                   |   |
| H                | 4.27071698621738  | 1.30557624097271  |   |
| 0.22932194331603 |                   |                   |   |

|                  |                   |                   |                   |
|------------------|-------------------|-------------------|-------------------|
| H                | 6.26475593032653  | 0.82481236783181  | -                 |
| 1.15645595322349 |                   |                   |                   |
| H                | 5.27121218871174  | -0.08583984093299 | -                 |
| 2.29789895725236 |                   |                   |                   |
| C                | 1.48710661583233  | -3.40500785211663 | -                 |
| 1.29866162366650 |                   |                   |                   |
| C                | 2.37055625357250  | -4.63998602106937 | -                 |
| 1.11564441064655 |                   |                   |                   |
| C                | 0.06392869683965  | -3.87808504079692 | -                 |
| 1.62728430051699 |                   |                   |                   |
| H                | 1.85004986428352  | -2.84123684531919 | -                 |
| 2.16862136417301 |                   |                   |                   |
| C                | 2.39300095541008  | -5.45036845952264 | -                 |
| 2.41349517315730 |                   |                   |                   |
| H                | 1.96771073820367  | -5.26967776586110 | -                 |
| 0.32190054885732 |                   |                   |                   |
| H                | 3.39002503672520  | -4.36952189237323 | -                 |
| 0.85154591834290 |                   |                   |                   |
| C                | 0.06608273778084  | -4.68377238832633 | -                 |
| 2.92471154962736 |                   |                   |                   |
| H                | -0.31399183692668 | -4.50574018077536 | -0.81813085115470 |
| H                | -0.59996710027241 | -3.01023464600793 | -1.73532026801872 |
| C                | 0.98588505036737  | -5.89471765545374 | -                 |
| 2.79860129751090 |                   |                   |                   |
| H                | 3.03796262347830  | -6.32299867743028 | -                 |
| 2.28803862036959 |                   |                   |                   |
| H                | 2.81156927093026  | -4.83759389073168 | -                 |
| 3.21493039570975 |                   |                   |                   |
| H                | -0.94790736513736 | -5.01169595520017 | -3.16160685361488 |
| H                | 0.41045350720078  | -4.04653476770879 | -                 |
| 3.74162552679398 |                   |                   |                   |
| H                | 1.01446550338906  | -6.44377495609985 | -                 |
| 3.74193565343386 |                   |                   |                   |
| H                | 0.59633752668279  | -6.56740983388388 | -                 |
| 2.03137586850812 |                   |                   |                   |
| C                | -3.68852089667008 | 0.34315855567068  |                   |
| 0.71905566299860 |                   |                   |                   |
| C                | -3.16552248229579 | 1.76049600586028  |                   |
| 0.47957558146531 |                   |                   |                   |
| C                | -5.17970179625448 | 0.38277551572307  |                   |
| 1.05098432422550 |                   |                   |                   |
| H                | -3.17151718659508 | -0.04279866423731 |                   |
| 1.60834574071455 |                   |                   |                   |
| C                | -3.39498891517548 | 2.62382932594538  |                   |

|                  |                   |                   |                   |
|------------------|-------------------|-------------------|-------------------|
| 1.71539884158725 |                   |                   |                   |
| H                | -3.67430689631222 | 2.21028537130210  | -                 |
| 0.37708704390657 |                   |                   |                   |
| H                | -2.09406086103912 | 1.72212439469174  |                   |
| 0.25390011607835 |                   |                   |                   |
| C                | -5.37858279284883 | 1.21361219963807  |                   |
| 2.31991269622526 |                   |                   |                   |
| H                | -5.74869900867270 | 0.85029079532342  |                   |
| 0.25050712122473 |                   |                   |                   |
| H                | -5.57199454310881 | -0.62165589028454 |                   |
| 1.20989541128178 |                   |                   |                   |
| C                | -4.87101989180005 | 2.63692997498215  |                   |
| 2.10475542484894 |                   |                   |                   |
| H                | -3.04611351525940 | 3.64232291287744  |                   |
| 1.52668836084894 |                   |                   |                   |
| H                | -2.80652411089707 | 2.22114424245940  |                   |
| 2.54316887404309 |                   |                   |                   |
| H                | -6.43849602323521 | 1.23354377816924  |                   |
| 2.58497156955672 |                   |                   |                   |
| H                | -4.83281050234859 | 0.75603371703143  |                   |
| 3.14821882864993 |                   |                   |                   |
| H                | -5.01096861752377 | 3.22524270470399  |                   |
| 3.01498593763776 |                   |                   |                   |
| H                | -5.45138800923794 | 3.11167686455043  |                   |
| 1.30948158100153 |                   |                   |                   |
| C                | -3.61774970887958 | -2.51761210763332 | -0.20687208847137 |
| C                | -3.48391553665344 |                   | -2.83269026072072 |
| 1.28507852062851 |                   |                   |                   |
| C                | -5.01915447910563 | -2.92870112814877 | -0.66691441378125 |
| H                | -2.89649426188841 | -3.15357301544857 | -0.74548269691710 |
| C                | -3.67100595450855 |                   | -4.32759436601887 |
| 1.53198812474587 |                   |                   |                   |
| H                | -4.24472145169377 |                   | -2.28834779588237 |
| 1.84607202137538 |                   |                   |                   |
| H                | -2.50820792144634 |                   | -2.51311280942703 |
| 1.64634656908977 |                   |                   |                   |
| C                | -5.22047413811982 | -4.42654593298963 | -0.42504193760830 |
| H                | -5.77670493813118 | -2.37868504693341 | -0.10752584140939 |
| H                | -5.16464558118155 | -2.73103737859509 | -1.72781554895568 |
| C                | -5.04809385254998 |                   | -4.77164346973141 |
| 1.05005570474606 |                   |                   |                   |
| H                | -3.56206409280638 |                   | -4.53903849192850 |
| 2.59710922947468 |                   |                   |                   |
| H                | -2.90039769806410 |                   | -4.88575501463944 |

|                  |                   |                   |                   |
|------------------|-------------------|-------------------|-------------------|
| 0.99718418863567 |                   |                   |                   |
| H                | -6.21860843323063 | -4.71595147981937 | -0.76055259570961 |
| H                | -4.49244498584443 | -4.98737188484967 | -1.01447984142609 |
| H                |                   | -5.17107746721204 | -5.84632670142123 |
| 1.19756206055237 |                   |                   |                   |
| H                |                   | -5.81805110726312 | -4.26325138169781 |
| 1.63442637775649 |                   |                   |                   |
| C                | -3.84016502617053 | -0.46305329772197 | -2.26106822055333 |
| C                |                   | -5.27253286640943 | 0.06451079277302  |
| 2.19407345346487 |                   |                   |                   |
| C                |                   | -3.02407894563908 | 0.45384231561916  |
| 3.17107676851766 |                   |                   |                   |
| H                | -3.84319347749987 | -1.45317487383943 | -2.73652968088436 |
| C                |                   | -5.89601396634661 | 0.08370506084468  |
| 3.58943116067686 |                   |                   |                   |
| H                |                   | -5.25585454673418 | 1.08712597286131  |
| 1.81503945989575 |                   |                   |                   |
| H                | -5.88622736501122 | -0.54420117769127 | -1.53289876429453 |
| C                |                   | -3.64082120197945 | 0.51744248197513  |
| 4.56724759287878 |                   |                   |                   |
| H                |                   | -2.96510966550101 | 1.45665262830122  |
| 2.74263771286847 |                   |                   |                   |
| H                |                   | -2.01167366168000 | 0.06772892126542  |
| 3.26080197950291 |                   |                   |                   |
| C                |                   | -5.08925655744145 | 0.98993813343459  |
| 4.51251325733917 |                   |                   |                   |
| H                |                   | -6.92708230242370 | 0.43865761085525  |
| 3.52463426531821 |                   |                   |                   |
| H                | -5.91524645244792 | -0.92910955693015 | -3.99845503245433 |
| H                |                   | -3.05178048520266 | 1.18967289319472  |
| 5.19550559494494 |                   |                   |                   |
| H                | -3.60325013663550 | -0.47706425678100 | -5.01948756327547 |
| H                |                   | -5.52168747538108 | 0.98902612902452  |
| 5.51578111540161 |                   |                   |                   |
| H                |                   | -5.12250564254893 | 2.01479937548266  |
| 4.13503754488195 |                   |                   |                   |
| H <sub>2</sub> O |                   |                   |                   |
| O                |                   | -1.41111615233912 | 0.13890715383491  |
| 0.00000468330131 |                   |                   |                   |
| H                |                   | -0.45153308755636 | 0.15432121192106  |
| 0.00000130681343 |                   |                   |                   |
| H                |                   | -1.71735252162555 | 1.04911900910577  |
| 0.00000416366796 |                   |                   |                   |



|                  |                   |                   |                   |
|------------------|-------------------|-------------------|-------------------|
| B                |                   |                   |                   |
| Pd               | -0.66708619893383 | -1.06378166990045 | -0.38528297764312 |
| O                | -0.00227323082559 | -0.68999282815695 | -2.48714474813593 |
| C                | 0.15094481522033  | 0.56029029843285  | -                 |
| 2.47239376607090 |                   |                   |                   |
| O                | -0.13364124762907 | 1.29018870743639  | -                 |
| 1.51003711555607 |                   |                   |                   |
| C                | 0.70221677621130  | 1.20317207772211  | -                 |
| 3.76232955035726 |                   |                   |                   |
| H                | -0.10768669938262 | 1.72583436503614  | -                 |
| 4.26850122674386 |                   |                   |                   |
| H                | 1.47350408411559  | 1.92976369913911  | -                 |
| 3.51641502756389 |                   |                   |                   |
| H                | 1.10598738342109  | 0.44551750258878  | -                 |
| 4.43019001484191 |                   |                   |                   |
| P                | -3.01057826126967 | -0.87445429334704 | -0.58956342789414 |
| P                | 1.34424443840094  | -2.15461589656749 | -0.00334288634393 |
| C                | 1.37946762907568  |                   | -3.12867603291017 |
| 1.59761998184397 |                   |                   |                   |
| C                | 0.24350694201344  |                   | -4.14904399529855 |
| 1.64213561049197 |                   |                   |                   |
| C                | 2.68374584228376  |                   | -3.79771203292796 |
| 2.02840630619198 |                   |                   |                   |
| H                | 1.15045981483147  |                   | -2.34764541205233 |
| 2.33883966593506 |                   |                   |                   |
| C                | 0.07085935131004  |                   | -4.68097496663636 |
| 3.06213978752315 |                   |                   |                   |
| H                | 0.47779807250446  |                   | -4.98851062835555 |
| 0.98582415874986 |                   |                   |                   |
| H                | -0.67916145055524 |                   | -3.67660707061554 |
| 1.28918976000850 |                   |                   |                   |
| C                | 2.52495777524013  |                   | -4.34171527470324 |
| 3.45020762081596 |                   |                   |                   |
| H                | 2.93095843277778  |                   | -4.62099761421477 |
| 1.35925468966072 |                   |                   |                   |
| H                | 3.51028570094439  |                   | -3.08702643785776 |
| 2.01536579190346 |                   |                   |                   |
| C                | 1.36817068758897  |                   | -5.33363864925045 |
| 3.53250559793045 |                   |                   |                   |
| H                | -0.74349890960687 |                   | -5.40718140143820 |
| 3.09242999673215 |                   |                   |                   |
| H                | -0.18773300468231 |                   | -3.85744836817100 |
| 3.73041946372535 |                   |                   |                   |

|                  |                  |                   |   |
|------------------|------------------|-------------------|---|
| H                | 3.45285457580264 | -4.82694893521207 |   |
| 3.76070074771103 |                  |                   |   |
| H                | 2.33622327964831 | -3.51077363073099 |   |
| 4.13379181354332 |                  |                   |   |
| H                | 1.25803226883306 | -5.68848559548814 |   |
| 4.55896598622480 |                  |                   |   |
| H                | 1.58791594534698 | -6.19802838681980 |   |
| 2.90175486904876 |                  |                   |   |
| C                | 2.92593756738033 | -1.16049326593125 |   |
| 0.15391962276161 |                  |                   |   |
| C                | 4.19311818476205 | -1.75088658802444 | - |
| 0.46094036832112 |                  |                   |   |
| C                | 2.69124213024182 | 0.23850574099751  | - |
| 0.41257115019877 |                  |                   |   |
| H                | 3.07130481144938 | -1.05350484091049 |   |
| 1.23840098096591 |                  |                   |   |
| C                | 5.39020685413553 | -0.84217437051381 | - |
| 0.17708204411149 |                  |                   |   |
| H                | 4.06463956029583 | -1.84679443195203 | - |
| 1.54102645065750 |                  |                   |   |
| H                | 4.40085090372941 | -2.73848633114503 | - |
| 0.04769555635327 |                  |                   |   |
| C                | 3.87759640495116 | 1.14862006109503  | - |
| 0.12004483618987 |                  |                   |   |
| H                | 2.54734779429061 | 0.17464094497956  | - |
| 1.49429629752516 |                  |                   |   |
| H                | 1.77898715485654 | 0.66187108054120  |   |
| 0.02346917844180 |                  |                   |   |
| C                | 5.15220405652744 | 0.56306593281205  | - |
| 0.72033517050312 |                  |                   |   |
| H                | 6.28781404461419 | -1.27044306233813 | - |
| 0.62963493265004 |                  |                   |   |
| H                | 5.55395637040179 | -0.78733307074159 |   |
| 0.90237052384831 |                  |                   |   |
| H                | 3.68963606054417 | 2.14325280093457  | - |
| 0.53099555703323 |                  |                   |   |
| H                | 3.99820751209766 | 1.25370938765542  |   |
| 0.96184257384760 |                  |                   |   |
| H                | 6.00725217558710 | 1.20268854930006  | - |
| 0.48835370124675 |                  |                   |   |
| H                | 5.05209331511052 | 0.52042191340389  | - |
| 1.80794744550022 |                  |                   |   |
| C                | 1.49557613941272 | -3.34754289242077 | - |
| 1.44240509594149 |                  |                   |   |

|                  |                   |                   |                   |
|------------------|-------------------|-------------------|-------------------|
| C                | 2.43608975231452  | -4.54903067601015 | -                 |
| 1.35288219471323 |                   |                   |                   |
| C                | 0.09384194180095  | -3.85969646270005 | -                 |
| 1.80763261885531 |                   |                   |                   |
| H                | 1.83160445810580  | -2.70086484337358 | -                 |
| 2.26445475639850 |                   |                   |                   |
| C                | 2.49393568971014  | -5.24878784702079 | -                 |
| 2.71241365812395 |                   |                   |                   |
| H                | 2.06165392608087  | -5.25776979783609 | -                 |
| 0.61283946998294 |                   |                   |                   |
| H                | 3.44254433984032  | -4.25183370952238 | -                 |
| 1.06502173779137 |                   |                   |                   |
| C                | 0.12883993429049  | -4.55322515093708 | -                 |
| 3.16617897260466 |                   |                   |                   |
| H                | -0.24864969971572 | -4.57308672317425 | -1.05511650729935 |
| H                | -0.61758489767251 | -3.01919134337155 | -1.83939579700059 |
| C                | 1.10828420657792  | -5.72378499128162 | -                 |
| 3.13950564000684 |                   |                   |                   |
| H                | 3.17812010403273  | -6.09892548933078 | -                 |
| 2.65794445860950 |                   |                   |                   |
| H                | 2.88416755667139  | -4.55350273138142 | -                 |
| 3.45950830425405 |                   |                   |                   |
| H                | -0.86999168542783 | -4.91090498997753 | -3.42816234425331 |
| H                | 0.43576046351482  | -3.83438633937073 | -                 |
| 3.92909445046057 |                   |                   |                   |
| H                | 1.16260551538548  | -6.18916400278620 | -                 |
| 4.12615736860950 |                   |                   |                   |
| H                | 0.75125136947913  | -6.47834164930311 | -                 |
| 2.43417391660779 |                   |                   |                   |
| C                | -3.66721154603141 |                   | 0.35084334316455  |
| 0.66273338674816 |                   |                   |                   |
| C                | -3.09487729137306 |                   | 1.73195968607328  |
| 0.34386463208614 |                   |                   |                   |
| C                | -5.15508345642214 |                   | 0.46511194308422  |
| 0.99066297200590 |                   |                   |                   |
| H                | -3.15941567985033 |                   | 0.00482491177207  |
| 1.57495748276907 |                   |                   |                   |
| C                | -3.28443158162620 |                   | 2.66903349978522  |
| 1.53225255984058 |                   |                   |                   |
| H                | -3.59294163546989 | 2.15207402847543  | -                 |
| 0.53392707334115 |                   |                   |                   |
| H                | -2.02788544684697 |                   | 1.63602755795514  |
| 0.11592442086201 |                   |                   |                   |
| C                | -5.32220719733202 |                   | 1.37162313319226  |

|                  |                   |                   |                   |
|------------------|-------------------|-------------------|-------------------|
| 2.21164259024060 |                   |                   |                   |
| H                |                   | -5.70614409378551 | 0.90856071855546  |
| 0.16421476822101 |                   |                   |                   |
| H                |                   | -5.58679657811484 | -0.51350862253098 |
| 1.20252958081361 |                   |                   |                   |
| C                |                   | -4.75801389598786 | 2.76010608348084  |
| 1.92161117158797 |                   |                   |                   |
| H                |                   | -2.90065302183620 | 3.66204008981558  |
| 1.28608327326497 |                   |                   |                   |
| H                |                   | -2.70777382597290 | 2.29103245193559  |
| 2.37995819205100 |                   |                   |                   |
| H                |                   | -6.38107657734222 | 1.44792909522701  |
| 2.47094379311951 |                   |                   |                   |
| H                |                   | -4.79708163266563 | 0.93838074166933  |
| 3.06630195598007 |                   |                   |                   |
| H                |                   | -4.87270204914741 | 3.40016539477851  |
| 2.79969602239924 |                   |                   |                   |
| H                |                   | -5.32175314561722 | 3.21485552442742  |
| 1.10282024382732 |                   |                   |                   |
| C                | -3.66009902604476 | -2.56179108012493 | -0.03554577928121 |
| C                |                   | -3.52275924950269 | -2.74483056208356 |
| 1.47755054464189 |                   |                   |                   |
| C                | -5.06838398387564 | -2.98826832881005 | -0.45412421148062 |
| H                | -2.94962696086410 | -3.25442940456907 | -0.51821777716143 |
| C                |                   | -3.74472316467838 | -4.20533253146867 |
| 1.86280443591250 |                   |                   |                   |
| H                |                   | -4.26301201757580 | -2.13109493062767 |
| 1.99227490892074 |                   |                   |                   |
| H                |                   | -2.53017481440842 | -2.42301069303331 |
| 1.80065022628636 |                   |                   |                   |
| C                | -5.30218392436088 | -4.45188792007537 | -0.07388262187900 |
| H                |                   | -5.81381008652869 | -2.37164221686546 |
| 0.05003293385157 |                   |                   |                   |
| H                | -5.20946022707453 | -2.88528515758697 | -1.52950909571865 |
| C                |                   | -5.13374969275431 | -4.66005011891911 |
| 1.42725694099802 |                   |                   |                   |
| H                |                   | -3.63456499690214 | -4.32051384951421 |
| 2.94266094729173 |                   |                   |                   |
| H                |                   | -2.99051146696837 | -4.82868892877462 |
| 1.37867862271173 |                   |                   |                   |
| H                | -6.30675296319377 | -4.75022500005287 | -0.38157372760590 |
| H                | -4.58681953408974 | -5.08086166623421 | -0.60854783109188 |
| H                |                   | -5.28056372043136 | -5.71267293827550 |
| 1.67630945763354 |                   |                   |                   |

|                  |                   |                   |                   |
|------------------|-------------------|-------------------|-------------------|
| H                | -5.88987117351708 |                   | -4.08049109809187 |
| 1.96146967293379 |                   |                   |                   |
| C                | -3.88063229808186 | -0.66133241743968 | -2.24819510215058 |
| C                | -5.30663007385524 | -0.11546376393877 | -2.21332463038916 |
| C                | -3.05688324376904 | 0.18707747072516  | -                 |
| 3.21545058870348 |                   |                   |                   |
| H                | -3.89596665077686 | -1.68136731725726 | -2.65908266623899 |
| C                | -5.93148416471506 | -0.18647113541536 | -3.60633317256079 |
| H                | -5.27751502490141 | 0.93105798660906  | -                 |
| 1.90651837330313 |                   |                   |                   |
| H                | -5.92563500225960 | -0.66889737839215 | -1.50935799224165 |
| C                | -3.67133933876888 | 0.16359068669099  | -                 |
| 4.61279389270362 |                   |                   |                   |
| H                | -2.99278593215629 | 1.21635476793198  | -                 |
| 2.85321533895142 |                   |                   |                   |
| H                | -2.04562350859004 | -0.20999052380205 | -3.27737251321683 |
| C                | -5.11774189294561 | 0.64642162906458  | -                 |
| 4.59109119500868 |                   |                   |                   |
| H                | -6.95970294293559 | 0.18121501113690  | -                 |
| 3.56652583162464 |                   |                   |                   |
| H                | -5.96069923691401 | -1.22543651788097 | -3.94446937518822 |
| H                | -3.07829168716660 | 0.79034161377290  | -                 |
| 5.28400841047018 |                   |                   |                   |
| H                | -3.63771490119288 | -0.85855215628527 | -5.00072442778429 |
| H                | -5.55067814483637 | 0.57757229486586  | -                 |
| 5.59212668139403 |                   |                   |                   |
| H                | -5.14506117385005 | 1.69603761363672  | -                 |
| 4.28711574418475 |                   |                   |                   |
| H                | -0.91788561393581 |                   | -1.09688556823221 |
| 1.07655209638650 |                   |                   |                   |
| 2                |                   |                   |                   |
| C                | -3.48596230008448 |                   | -0.52312792346308 |
| 0.00006996950663 |                   |                   |                   |
| C                | -2.27178495332905 |                   | -0.52316162060602 |
| 0.00005685438982 |                   |                   |                   |
| C                | -0.92132725448738 |                   | -0.52319955409310 |
| 0.00001998642469 |                   |                   |                   |
| C                | 0.29285011689373  | -0.52321359050700 | -                 |
| 0.00001222867825 |                   |                   |                   |
| C                | -4.89463404096872 |                   | -0.52302649176823 |
| 0.00008791255039 |                   |                   |                   |
| C                | -5.59841002553144 |                   | 0.68386322513471  |
| 0.04213560942293 |                   |                   |                   |

|                  |                   |                   |                   |
|------------------|-------------------|-------------------|-------------------|
| C                | -5.59861402940082 | -1.72979608472890 | -0.04194361181772 |
| C                |                   | -6.97990345693396 | 0.67706079457398  |
| 0.04158059358207 |                   |                   |                   |
| H                |                   | -5.05222199779449 | 1.61535354270561  |
| 0.07504375361598 |                   |                   |                   |
| C                | -6.98010697900468 | -1.72275953600362 | -0.04134575380028 |
| H                | -5.05258800781493 | -2.66137977635822 | -0.07487542977713 |
| C                |                   | -7.67369548868895 | -0.52279072978543 |
| 0.00013159635691 |                   |                   |                   |
| H                |                   | -7.51962051031120 | 1.61220580774686  |
| 0.07402836407722 |                   |                   |                   |
| H                | -7.51998371076532 | -2.65781325842204 | -0.07377542590060 |
| H                |                   | -8.75357954592705 | -0.52269908792443 |
| 0.00015303060414 |                   |                   |                   |
| C                | 1.70152230787276  | -0.52323278195591 | -                 |
| 0.00011301694720 |                   |                   |                   |
| C                | 2.40530048094945  | -0.48150669522507 | -                 |
| 1.20701233168255 |                   |                   |                   |
| C                | 2.40550016994495  |                   | -0.56496759461195 |
| 1.20666791717605 |                   |                   |                   |
| C                | 3.78679390696384  | -0.48208996378151 | -                 |
| 1.20020825874402 |                   |                   |                   |
| H                | 1.85911455832560  | -0.44879310866746 | -                 |
| 2.13851083010381 |                   |                   |                   |
| C                | 3.78699311875333  |                   | -0.56440976247068 |
| 1.19963246775570 |                   |                   |                   |
| H                | 1.85947273243306  |                   | -0.59766518163312 |
| 2.13825904453393 |                   |                   |                   |
| C                | 4.48058377826726  | -0.52325730174685 | -                 |
| 0.00034601457942 |                   |                   |                   |
| H                | 4.32651238885229  | -0.44986636845558 | -                 |
| 2.13536020644738 |                   |                   |                   |
| H                | 4.32686775992224  |                   | -0.59664211527203 |
| 2.13469421100624 |                   |                   |                   |
| H                | 5.56046790584128  | -0.52326727732299 | -                 |
| 0.00043676678126 |                   |                   |                   |
| C                |                   |                   |                   |
| C                | -3.04190880291289 | -1.21488330916703 | -0.22322769724512 |
| C                |                   | -1.88325141626087 | -0.95875619505364 |
| 0.04130331641308 |                   |                   |                   |
| C                | -4.38119958920366 | -1.48555635628448 | -0.58063403554626 |
| C                | -5.04545868186016 | -0.61964643021351 | -1.45653148196601 |
| C                | -5.04923145736126 | -2.62039144240588 | -0.11710956533646 |

|                  |                   |                   |                   |
|------------------|-------------------|-------------------|-------------------|
| C                | -6.34668884419098 | -0.87672766176661 | -1.83904199573120 |
| H                | -4.52757044344085 | 0.25143415849860  | -                 |
| 1.83361411554211 |                   |                   |                   |
| C                | -6.35107237324007 | -2.86947137377101 | -0.50586224590869 |
| H                | -4.53885063356251 |                   | -3.30249235262440 |
| 0.54462052706587 |                   |                   |                   |
| C                | -7.00658152498341 | -1.99924489197885 | -1.36253966561054 |
| H                | -6.85145432306395 | -0.19949334157003 | -2.51435084005038 |
| H                | -6.86061138252247 | -3.74985710595948 | -0.13912955285513 |
| H                | -8.02592244718997 | -2.19733178717110 | -1.66285237813827 |
| C                | -0.51349297619980 |                   | -0.66048631658872 |
| 0.07646417523367 |                   |                   |                   |
| C                | 0.19101966112061  | -1.04461670432726 | -                 |
| 1.00879039870256 |                   |                   |                   |
| H                | -0.29155546990960 | -1.65938707976815 | -1.77022980233961 |
| C                | 1.58308890873159  | -0.71666479277480 | -                 |
| 1.28675494840656 |                   |                   |                   |
| C                | 2.43892245231662  | -1.64670439917570 | -                 |
| 1.87655676018216 |                   |                   |                   |
| C                | 2.06574136624612  | 0.56769512023700  | -                 |
| 1.02521124127741 |                   |                   |                   |
| C                | 3.75178504018317  | -1.31733639948733 | -                 |
| 2.15191126071820 |                   |                   |                   |
| H                | 2.07157872405192  | -2.64001313883258 | -                 |
| 2.09904964237844 |                   |                   |                   |
| C                | 3.37918619402931  | 0.89503067155340  | -                 |
| 1.30825462082100 |                   |                   |                   |
| H                | 1.36759891490038  | 1.31862029233373  | -                 |
| 0.65902141299268 |                   |                   |                   |
| C                | 4.22903820324940  | -0.04855567599049 | -                 |
| 1.86282447185643 |                   |                   |                   |
| H                | 4.41129509178918  | -2.05315917533592 | -                 |
| 2.59491638952739 |                   |                   |                   |
| H                | 3.74682450264631  | 1.89190307464928  | -                 |
| 1.10580154864027 |                   |                   |                   |
| H                | 5.25851903672373  | 0.20619303410992  | -                 |
| 2.07898015586926 |                   |                   |                   |
| Pd               | 0.52780631499222  |                   | -0.02285266892569 |
| 1.68222783404807 |                   |                   |                   |
| O                | 2.23804737761557  |                   | 0.27840618615427  |
| 3.04301254317717 |                   |                   |                   |
| O                | 2.33515217807140  |                   | -1.25559389882721 |
| 1.47674195292398 |                   |                   |                   |
| P                | -0.67264147397542 | -2.48217867262323 | 3.27078774205304  |

|                  |                   |                   |
|------------------|-------------------|-------------------|
| P                | -0.56357378214891 | 1.92440853846323  |
| 2.12593672786442 |                   |                   |
| C                | 2.86881612932497  | -0.58231760655487 |
| 2.38504384740859 |                   |                   |
| C                | -0.82081506367812 | -3.83916002328402 |
| 1.96936054023635 |                   |                   |
| C                | -2.37184353367275 | -2.46551645403374 |
| 4.11688327238013 |                   |                   |
| C                | 0.36555021467398  | -3.12580414218170 |
| 4.71707674060059 |                   |                   |
| C                | -2.30773690815077 | 2.16270643471083  |
| 1.49411987085266 |                   |                   |
| C                | 0.43206932939279  | 3.34782605882777  |
| 1.41200939234296 |                   |                   |
| C                | -0.47832309035737 | 2.21851124348020  |
| 3.97146814074217 |                   |                   |
| C                | 4.34297136718397  | -0.81068622322953 |
| 2.71467329791939 |                   |                   |
| C                | 0.53204142676257  | -4.03550878010843 |
| 1.28528351917523 |                   |                   |
| C                | -1.43241432829854 | -5.20785756330649 |
| 2.26768806871006 |                   |                   |
| H                | -1.47472782347089 | -3.34126406915137 |
| 1.23773747334531 |                   |                   |
| C                | -3.48421109227288 | -2.42505821156360 |
| 3.07209398624457 |                   |                   |
| C                | -2.72790523192440 | -3.50533873397316 |
| 5.18028172233463 |                   |                   |
| H                | -2.36142838624519 | -1.49267562391739 |
| 4.62608261192902 |                   |                   |
| C                | 0.43936361409977  | -4.63495356286444 |
| 4.93221124707647 |                   |                   |
| C                | 1.78476037643536  | -2.56676962491735 |
| 4.64037991593471 |                   |                   |
| H                | -0.10660161084013 | -2.66418824108462 |
| 5.59450347722347 |                   |                   |
| C                | -3.24940479184265 | 1.30124609062733  |
| 2.33498587053199 |                   |                   |
| C                | -2.86773193595579 | 3.57584926216696  |
| 1.35084204705470 |                   |                   |
| H                | -2.26164603730604 | 1.71772521849780  |
| 0.49000141796224 |                   |                   |
| C                | 0.21947276991396  | 4.75138595531320  |
| 1.98872814098483 |                   |                   |



|                  |                   |                   |   |
|------------------|-------------------|-------------------|---|
| C                | 1.93102179975844  | 3.04287910542215  |   |
| 1.52073266103738 |                   |                   |   |
| H                | 0.15331298284724  | 3.35622977358106  |   |
| 0.34714514410281 |                   |                   |   |
| C                | -1.34179345887880 | 3.30876189466606  |   |
| 4.61043001097000 |                   |                   |   |
| C                | -0.70795797031308 | 0.90511057919159  |   |
| 4.72412297224222 |                   |                   |   |
| H                | 0.57897636312276  | 2.48459017938286  |   |
| 4.11088631209954 |                   |                   |   |
| H                | 4.48769255624301  | -0.78932577131765 |   |
| 3.79192447397496 |                   |                   |   |
| H                | 4.67829231291334  | -1.76153746610836 |   |
| 2.30898926964745 |                   |                   |   |
| H                | 4.93398621165113  | -0.01060977651622 |   |
| 2.27222815202023 |                   |                   |   |
| C                | 0.36002812084018  | -4.80659463082231 | - |
| 0.01858792758739 |                   |                   |   |
| H                | 1.20880081805439  | -4.58728677212726 |   |
| 1.94192957742987 |                   |                   |   |
| H                | 0.98572073976452  | -3.06572071536841 |   |
| 1.07555829431258 |                   |                   |   |
| C                | -1.64222753211658 | -5.95568910006274 |   |
| 0.95032515745380 |                   |                   |   |
| H                | -0.76943130244125 | -5.80074933210021 |   |
| 2.89477213891172 |                   |                   |   |
| H                | -2.38884828416770 | -5.11351554270000 |   |
| 2.77937814365209 |                   |                   |   |
| C                | -4.81346024712592 | -2.04241259139675 |   |
| 3.71569024695033 |                   |                   |   |
| H                | -3.59082244421115 | -3.41082872395835 |   |
| 2.62047749574920 |                   |                   |   |
| H                | -3.22925310798906 | -1.72173841201216 |   |
| 2.27901276996496 |                   |                   |   |
| C                | -4.06118050371921 | -3.13459020063896 |   |
| 5.83389339505841 |                   |                   |   |
| H                | -2.81998416625155 | -4.49553225437042 |   |
| 4.73472485133822 |                   |                   |   |
| H                | -1.96731844766396 | -3.55172898994905 |   |
| 5.95837609082526 |                   |                   |   |
| C                | 1.19558061108896  | -4.94977610083825 |   |
| 6.22250241999224 |                   |                   |   |
| H                | 0.97625790430057  | -5.09071929653758 |   |
| 4.09937696241146 |                   |                   |   |

|                  |                   |                   |
|------------------|-------------------|-------------------|
| H                | -0.55616949557228 | -5.07170162132775 |
| 4.98478917903196 |                   |                   |
| C                | 2.56543503344055  | -2.88523115609508 |
| 5.91196526251357 |                   |                   |
| H                | 2.30291229453172  | -2.98785997949765 |
| 3.77578893378225 |                   |                   |
| H                | 1.74281345406361  | -1.48447260085051 |
| 4.51552734879736 |                   |                   |
| C                | -4.63983963356646 | 1.25414418551644  |
| 1.71077178543870 |                   |                   |
| H                | -3.33742755181592 | 1.72192613444157  |
| 3.33648386156121 |                   |                   |
| H                | -2.82414324417609 | 0.29752129074732  |
| 2.41351664054280 |                   |                   |
| C                | -4.26402496666424 | 3.51683438292632  |
| 0.72868230118635 |                   |                   |
| H                | -2.93652028041676 | 4.05755413894016  |
| 2.32652285756614 |                   |                   |
| H                | -2.22703470457655 | 4.17264354803144  |
| 0.70174335509598 |                   |                   |
| C                | 0.99137708977001  | 5.77314116299242  |
| 1.15177760673721 |                   |                   |
| H                | 0.60449549138455  | 4.78289273660440  |
| 3.00880903762112 |                   |                   |
| H                | -0.83097249481234 | 5.03190034967053  |
| 2.00621517101283 |                   |                   |
| C                | 2.73710923805252  | 4.04247412527800  |
| 0.69613698143169 |                   |                   |
| H                | 2.24066369331250  | 3.11077125969108  |
| 2.56643380183593 |                   |                   |
| H                | 2.14884690268234  | 2.02510338748559  |
| 1.18017875082525 |                   |                   |
| C                | -0.92424591352050 | 3.48496388169145  |
| 6.07170801729318 |                   |                   |
| H                | -2.39229833007528 | 3.01833311341148  |
| 4.58471763512291 |                   |                   |
| H                | -1.24204106068568 | 4.25930809509864  |
| 4.09124237407079 |                   |                   |
| C                | -0.30130729036140 | 1.06027086186096  |
| 6.18633920357567 |                   |                   |
| H                | -1.76296843334058 | 0.63237794192553  |
| 4.67199646998381 |                   |                   |
| H                | -0.11915704942324 | 0.10518689082440  |
| 4.25458337035760 |                   |                   |

|                  |                   |                   |
|------------------|-------------------|-------------------|
| C                | -0.31115523775602 | -6.15370669029697 |
| 0.23217923084704 |                   |                   |
| H                | 1.33504679456167  | -4.95762864695619 |
| 0.49039520310241 |                   |                   |
| H                | -0.25473828206527 | -4.21647000851477 |
| H                | -2.10680515176019 | -6.92611551255658 |
| 1.14636173510936 |                   |                   |
| H                | -2.31595054307874 | -5.38422694512123 |
| 0.30685703852940 |                   |                   |
| C                | -5.17779798263576 | -3.05285388503761 |
| 4.79842375468700 |                   |                   |
| H                | -5.59548812179234 | -2.00843681619051 |
| 2.95438207069039 |                   |                   |
| H                | -4.73125571847946 | -1.04889093222937 |
| 4.16055098419937 |                   |                   |
| H                | -4.31194459127822 | -3.87873958742076 |
| 6.59374753859158 |                   |                   |
| H                | -3.96220984864881 | -2.16794140786038 |
| 6.33288187772937 |                   |                   |
| C                | 2.61187667676842  | -4.38872676114238 |
| 6.15995930540801 |                   |                   |
| H                | 1.22879804319237  | -6.03202988485568 |
| 6.37411230032351 |                   |                   |
| H                | 0.66885259889393  | -4.51019136928426 |
| 7.07354432897920 |                   |                   |
| H                | 3.58138131035327  | -2.48918806580345 |
| 5.83202692469302 |                   |                   |
| H                | 2.08443155479008  | -2.39486629695726 |
| 6.76270185244313 |                   |                   |
| C                | -5.20246389302064 | 2.66481193270273  |
| 1.57513825111469 |                   |                   |
| H                | -5.30209200774249 | 0.64303439833744  |
| 2.32521363554832 |                   |                   |
| H                | -4.57873537902235 | 0.79458931041202  |
| 0.72560173635076 |                   |                   |
| H                | -4.66038978957534 | 4.52976445045315  |
| 0.63252881060764 |                   |                   |
| H                | -4.19255912413379 | 3.08603774534892  |
| 0.27197380701381 |                   |                   |
| C                | 2.48485769023126  | 5.46729381455752  |
| 1.17913516649499 |                   |                   |
| H                | 0.81018114838771  | 6.77623233679115  |
| 1.54383652249955 |                   |                   |
| H                | 0.63221756298970  | 5.74713930767079  |

|                  |                   |                   |                   |
|------------------|-------------------|-------------------|-------------------|
| 0.12033624544223 |                   |                   |                   |
| H                |                   | 3.80223109330545  | 3.80994442241437  |
| 0.77226886133442 |                   |                   |                   |
| H                | 2.44938260254851  | 3.96268657468417  | -                 |
| 0.35556053856308 |                   |                   |                   |
| C                | -1.10062311441564 |                   | 2.18145620470813  |
| 6.84469570867281 |                   |                   |                   |
| H                | -1.52377957940336 |                   | 4.27410216632570  |
| 6.53103415682551 |                   |                   |                   |
| H                | 0.12315101991011  |                   | 3.79204072204941  |
| 6.11592990655774 |                   |                   |                   |
| H                | -0.46947446695690 |                   | 0.12231924661630  |
| 6.71939767851687 |                   |                   |                   |
| H                | 0.76484396996396  |                   | 1.28953856382709  |
| 6.24219843613978 |                   |                   |                   |
| H                | -0.47031607738950 | -6.67641507673747 | -0.71512201934991 |
| H                | 0.34310390333142  |                   | -6.77667601887053 |
| 0.84855476002602 |                   |                   |                   |
| H                | -6.11432306585174 |                   | -2.76677151470194 |
| 5.28225422679318 |                   |                   |                   |
| H                | -5.32357026216241 |                   | -4.03540277262623 |
| 4.34354999004268 |                   |                   |                   |
| H                | 3.14359385702753  |                   | -4.60086479318037 |
| 7.09159563408019 |                   |                   |                   |
| H                | 3.15873635308717  |                   | -4.87332504781150 |
| 5.34657999857811 |                   |                   |                   |
| H                | -6.19043796342318 |                   | 2.62855874293382  |
| 1.11264360470341 |                   |                   |                   |
| H                | -5.31065802346970 |                   | 3.11500679674687  |
| 2.56427833405832 |                   |                   |                   |
| H                | 3.02552835926177  |                   | 6.17811666255477  |
| 0.55028029756984 |                   |                   |                   |
| H                | 2.85762778934952  |                   | 5.57430273287377  |
| 2.20054485992551 |                   |                   |                   |
| H                | -0.77523170606262 |                   | 2.31615333158069  |
| 7.87840848158470 |                   |                   |                   |
| H                | -2.15890244653028 |                   | 1.91100478387283  |
| 6.85997043132745 |                   |                   |                   |
|                  |                   |                   |                   |
| I                |                   |                   |                   |
| B                | -1.95523702762375 |                   | -0.29517129007790 |
| 0.00039535376433 |                   |                   |                   |
| C                | -2.75218072658508 | -1.67327928686627 | -0.00002432692609 |
| C                | -3.10947885660828 | -2.29884200984715 | -1.19257348518311 |

|                  |                   |                   |                  |                   |
|------------------|-------------------|-------------------|------------------|-------------------|
| C                |                   | -3.11269403537552 |                  | -2.29731506846256 |
| 1.19235592685784 |                   |                   |                  |                   |
| C                | -3.79942055518447 | -3.49907774281409 |                  | -1.19623944310425 |
| H                | -2.84059030548194 | -1.83691905064353 |                  | -2.13267603420949 |
| C                |                   | -3.80267505097203 |                  | -3.49751622470063 |
| 1.19570824227859 |                   |                   |                  |                   |
| H                |                   | -2.84634418794999 |                  | -1.83417587860995 |
| 2.13258030176741 |                   |                   |                  |                   |
| C                | -4.14940336639514 | -4.10238457461862 |                  | -0.00034583604002 |
| H                | -4.06520725807366 | -3.96477746994267 |                  | -2.13497895007693 |
| H                |                   | -4.07102296351898 |                  | -3.96196755782720 |
| 2.13433728270658 |                   |                   |                  |                   |
| H                | -4.68886762191818 | -5.03895054311057 |                  | -0.00046831245749 |
| O                | -2.67848094279491 |                   | 0.84493480123637 | -                 |
| 0.00268084067476 |                   |                   |                  |                   |
| H                | -2.22745051971647 |                   | 1.69378148198327 | -                 |
| 0.00292016129810 |                   |                   |                  |                   |
| O                |                   | -0.60643642336029 |                  | -0.35908780030279 |
| 0.00294691620192 |                   |                   |                  |                   |
| H                |                   | -0.09270172309382 |                  | 0.45328701695152  |
| 0.00364176289416 |                   |                   |                  |                   |
| F                |                   |                   |                  |                   |
| B                | -1.74492050756093 | -0.37896420430084 |                  | -0.17643358086265 |
| O                | -2.47363971230271 |                   | 0.67567023818668 | -                 |
| 0.56482459812807 |                   |                   |                  |                   |
| H                | -2.15694511006374 |                   | 1.57561224013887 | -                 |
| 0.45493613660784 |                   |                   |                  |                   |
| O                |                   | -0.55816858861725 |                  | -0.39360412294433 |
| 0.44436936262163 |                   |                   |                  |                   |
| H                |                   | -0.12273061583355 |                  | 0.42549103173200  |
| 0.69377790241998 |                   |                   |                  |                   |
| O                | -2.30553348299771 | -1.66103134425061 |                  | -0.34585489815339 |
| C                | -3.10163570785332 | -2.05320765411970 |                  | -1.34058447635019 |
| O                | -3.21244774446631 | -1.45540609110911 |                  | -2.38297211294444 |
| C                | -3.81421289688849 | -3.33839235172831 |                  | -1.01473618570152 |
| H                | -4.69770737203602 | -3.09727301818644 |                  | -0.42603736221586 |
| H                | -4.12169717784543 | -3.83101929942439 |                  | -1.93214145750259 |
| H                | -3.16857439362443 | -3.97889144091346 |                  | -0.42134129448624 |
| D                |                   |                   |                  |                   |
| C                |                   | -3.76153562652437 |                  | -1.36252808807871 |
| 1.55413899146900 |                   |                   |                  |                   |
| C                |                   | -2.62292536603614 |                  | -1.17429898918579 |

|                  |                   |                   |                   |
|------------------|-------------------|-------------------|-------------------|
| 1.15448903675819 |                   |                   |                   |
| C                |                   | -5.06410940564451 | -1.58058292043279 |
| 2.03316678258159 |                   |                   |                   |
| C                |                   | -5.93769428014294 | -0.50610677111713 |
| 2.23686347067329 |                   |                   |                   |
| C                |                   | -5.52086739275107 | -2.87730789171529 |
| 2.29534907378536 |                   |                   |                   |
| C                |                   | -7.22052973838691 | -0.72596347645253 |
| 2.69443060365104 |                   |                   |                   |
| H                |                   | -5.59644702156031 | 0.49896997584114  |
| 2.03364992844049 |                   |                   |                   |
| C                |                   | -6.80550116510517 | -3.08656623761920 |
| 2.75284530681174 |                   |                   |                   |
| H                |                   | -4.85763165085930 | -3.71619212417208 |
| 2.13498236612805 |                   |                   |                   |
| C                |                   | -7.66145399001561 | -2.01457685017117 |
| 2.95689404973816 |                   |                   |                   |
| H                |                   | -7.88681168823431 | 0.11293791635044  |
| 2.85116992551736 |                   |                   |                   |
| H                |                   | -7.14781653003947 | -4.09387380644764 |
| 2.95373416462271 |                   |                   |                   |
| H                |                   | -8.66786821534301 | -2.18266195352582 |
| 3.31748015275862 |                   |                   |                   |
| C                |                   | -1.32560861610421 | -0.94491342794083 |
| 0.70340852589440 |                   |                   |                   |
| C                | -1.02138936153268 | -1.01270657467143 | -0.60941202909920 |
| H                | -1.80295215166088 | -1.26229375834185 | -1.32907904956592 |
| C                | 0.28066859123325  | -0.76415157869226 | -                 |
| 1.19127943213022 |                   |                   |                   |
| C                | 0.45772049061718  | -0.81809757671374 | -                 |
| 2.57708464783016 |                   |                   |                   |
| C                | 1.38953387159184  | -0.45183029243634 | -                 |
| 0.39746255885693 |                   |                   |                   |
| C                | 1.69208206267742  | -0.56656104048175 | -                 |
| 3.14287207949320 |                   |                   |                   |
| H                | -0.38647893204391 | -1.05835573797730 | -3.21176755305715 |
| C                | 2.62123997750003  | -0.20067949335609 | -                 |
| 0.96425483787794 |                   |                   |                   |
| H                | 1.25204600742913  | -0.41403322067670 | -                 |
| 0.68749910706122 |                   |                   |                   |
| C                | 2.77975258277401  | -0.25562938032486 | -                 |
| 2.34154780461099 |                   |                   |                   |
| H                | 1.81046960559508  | -0.61212736286592 | -                 |
| 4.21883724872142 |                   |                   |                   |

|                  |                   |                   |                   |
|------------------|-------------------|-------------------|-------------------|
| H                | 3.46801456852558  | 0.03881283629006  | -                 |
| 0.33582528752576 |                   |                   |                   |
| H                | 3.74526540275020  | -0.05909201320084 | -                 |
| 2.78904981644148 |                   |                   |                   |
| Pd               | -0.35051100272124 | -0.49714539010279 | 2.47862917346188  |
| P                | -0.12961883112136 | -2.73543687567250 | 3.03190171422954  |
| P                | -0.47078306883735 |                   | 1.77533955308455  |
| 1.89329830087314 |                   |                   |                   |
| C                | -0.86458104317728 |                   | -3.92179926590565 |
| 1.78358355430477 |                   |                   |                   |
| C                | -1.00617616951377 |                   | -3.00527268551843 |
| 4.65374328056199 |                   |                   |                   |
| C                | 1.62192067841733  |                   | -3.25829450204535 |
| 3.39569899945736 |                   |                   |                   |
| C                | -1.06018341780985 |                   | 2.26330481322916  |
| 0.17127719281532 |                   |                   |                   |
| C                | 1.19777793127757  |                   | 2.64124873288407  |
| 1.88291466764723 |                   |                   |                   |
| C                | -1.60140330497262 |                   | 2.59024283552977  |
| 3.13670110123748 |                   |                   |                   |
| C                | 0.03036860725296  |                   | -3.98497888875856 |
| 0.54315187631401 |                   |                   |                   |
| C                | -1.25319976849481 |                   | -5.33839782690474 |
| 2.20205923929640 |                   |                   |                   |
| H                | -1.79070471341734 |                   | -3.40364001637126 |
| 1.49617510302193 |                   |                   |                   |
| C                | -2.48555740001308 |                   | -2.69253086920977 |
| 4.42220227628241 |                   |                   |                   |
| C                | -0.82039389706836 |                   | -4.28939938126909 |
| 5.46043772601355 |                   |                   |                   |
| H                | -0.59212980336342 |                   | -2.19434198766397 |
| 5.26931924880057 |                   |                   |                   |
| C                | 1.95978015860819  |                   | -4.74846432815329 |
| 3.44004834383116 |                   |                   |                   |
| C                | 2.58392655798861  |                   | -2.56379690179801 |
| 2.42729295355130 |                   |                   |                   |
| H                | 1.78793275480044  |                   | -2.83586955310496 |
| 4.39726734606080 |                   |                   |                   |
| C                | -2.54555028098654 | 1.98722345868715  | -                 |
| 0.06997536543899 |                   |                   |                   |
| C                | -0.75713472689420 | 3.68068139630985  | -                 |
| 0.32354336616222 |                   |                   |                   |
| H                | -0.48720328935087 | 1.57015499560985  | -                 |
| 0.46086299134844 |                   |                   |                   |

|                  |                   |                   |
|------------------|-------------------|-------------------|
| C                | 1.24961871431596  | 4.08737777514107  |
| 2.37447744348521 |                   |                   |
| C                | 2.22505141677552  | 1.83504609493022  |
| 2.67217211445205 |                   |                   |
| H                | 1.49897169278094  | 2.60156927648994  |
| 0.82722792012028 |                   |                   |
| C                | -2.06115389425076 | 4.03779702641422  |
| 2.96181981228170 |                   |                   |
| C                | -2.85257159012310 | 1.70870164161720  |
| 3.26562861725941 |                   |                   |
| H                | -1.02912573576519 | 2.51055781029128  |
| 4.07261430012437 |                   |                   |
| C                | -0.72005810099461 | -4.64266666046593 |
| H                | 0.92006294723813  | -4.57814412313725 |
| 0.75565186796530 |                   |                   |
| H                | 0.34514563120366  | -2.97789834466903 |
| 0.26272091813727 |                   |                   |
| C                | -1.99502502484564 | -6.01557001798396 |
| 1.04757695482548 |                   |                   |
| H                | -0.37014344974438 | -5.92370185112031 |
| 2.45626977638004 |                   |                   |
| H                | -1.91520369460245 | -5.31629207938129 |
| 3.06657740718545 |                   |                   |
| C                | -3.23157898739828 | -2.59621740460843 |
| 5.74742638336120 |                   |                   |
| H                | -2.94466996558006 | -3.47166772961149 |
| 3.81169074389108 |                   |                   |
| H                | -2.56197248803053 | -1.74635633290081 |
| 3.86835745236478 |                   |                   |
| C                | -1.58663448781560 | -4.16933033388827 |
| 6.77928787882656 |                   |                   |
| H                | -1.18410368920205 | -5.16279112758222 |
| 4.92198375876635 |                   |                   |
| H                | 0.23567553988150  | -4.43700773571290 |
| 5.68755330601681 |                   |                   |
| C                | 3.39169086542070  | -4.91894393215970 |
| 3.94886150688825 |                   |                   |
| H                | 1.89788768214845  | -5.17679872706355 |
| 2.43984074744234 |                   |                   |
| H                | 1.27352945065038  | -5.29383438648536 |
| 4.08567935224344 |                   |                   |
| C                | 4.02186542843333  | -2.72425059192117 |
| 2.91269179129480 |                   |                   |
| H                | 2.49275817787556  | -2.99949931281226 |



|                  |                   |                   |                   |
|------------------|-------------------|-------------------|-------------------|
| 1.43189473435227 |                   |                   |                   |
| H                |                   | 2.31597803326789  | -1.50242834846536 |
| 2.35370839111336 |                   |                   |                   |
| C                | -2.85136959824408 | 2.04743830506596  | -                 |
| 1.56380540246163 |                   |                   |                   |
| H                | -3.14689825252324 |                   | 2.74736198790508  |
| 0.43130321941064 |                   |                   |                   |
| H                | -2.82328082755661 |                   | 1.00866878148509  |
| 0.32004737299958 |                   |                   |                   |
| C                | -1.06527030395031 | 3.77315241865009  | -                 |
| 1.81956182609978 |                   |                   |                   |
| H                | -1.36742783077770 |                   | 4.40773397093372  |
| 0.21243883366167 |                   |                   |                   |
| H                | 0.29007202349301  | 3.94059636216821  | -                 |
| 0.18430144811047 |                   |                   |                   |
| C                | 2.65114949939398  |                   | 4.66303987760355  |
| 2.16545634778043 |                   |                   |                   |
| H                | 1.00899810796100  |                   | 4.11156168043869  |
| 3.43871627818203 |                   |                   |                   |
| H                | 0.53696378820308  |                   | 4.71371561558286  |
| 1.84030251794893 |                   |                   |                   |
| C                | 3.62995384242333  |                   | 2.38565454545819  |
| 2.45182087106137 |                   |                   |                   |
| H                | 1.98064426492792  |                   | 1.88605814850519  |
| 3.73404365674962 |                   |                   |                   |
| H                | 2.17905171898345  |                   | 0.78660429476271  |
| 2.35768497837612 |                   |                   |                   |
| C                | -2.87389219088273 |                   | 4.46312154144589  |
| 4.18656282402476 |                   |                   |                   |
| H                | -2.69196806633569 |                   | 4.12213902724650  |
| 2.07637682327985 |                   |                   |                   |
| H                | -1.22073353530171 |                   | 4.71768302847407  |
| 2.84919156823921 |                   |                   |                   |
| C                | -3.65881073582531 |                   | 2.10881751716824  |
| 4.49768611493301 |                   |                   |                   |
| H                | -3.48355824870736 |                   | 1.84291412859253  |
| 2.38762526406396 |                   |                   |                   |
| H                | -2.56951448564872 |                   | 0.64472578806336  |
| 3.29664224990434 |                   |                   |                   |
| C                | -1.14025838777472 | -6.05456093896675 | -0.21465633612535 |
| H                | -0.08257312043581 | -4.67488163039942 | -1.49600435991688 |
| H                | -1.60428922438276 | -4.05042404622411 | -0.85207866240391 |
| H                | -2.27529523610765 |                   | -7.03080762105263 |
| 1.33984143933761 |                   |                   |                   |

|                  |                   |                   |   |
|------------------|-------------------|-------------------|---|
| H                | -2.91323388933405 | -5.46178918247480 |   |
| 0.83737921289997 |                   |                   |   |
| C                | -3.06607050559562 | -3.89323686063490 |   |
| 6.53196734171454 |                   |                   |   |
| H                | -4.29004448078632 | -2.39988227968917 |   |
| 5.56326946991988 |                   |                   |   |
| H                | -2.82827830554519 | -1.76907040065738 |   |
| 6.33454176908331 |                   |                   |   |
| H                | -1.46899948243788 | -5.09279791522835 |   |
| 7.35181847480103 |                   |                   |   |
| H                | -1.16392477129118 | -3.35262799347539 |   |
| 7.36882342477674 |                   |                   |   |
| C                | 4.37575093384254  | -4.20406915841367 |   |
| 3.02728001313609 |                   |                   |   |
| H                | 3.63806501496091  | -5.98201515079899 |   |
| 4.00218779394506 |                   |                   |   |
| H                | 3.47201079954264  | -4.50575372679088 |   |
| 4.95695643316289 |                   |                   |   |
| H                | 4.70708469343256  | -2.23325648452625 |   |
| 2.21880061844647 |                   |                   |   |
| H                | 4.13521428077526  | -2.25227341460433 |   |
| 3.89108662167404 |                   |                   |   |
| C                | -2.52227034844450 | 3.43179642807594  | - |
| 2.10936070969532 |                   |                   |   |
| H                | -3.90584011827617 | 1.81685893783468  | - |
| 1.73339880702391 |                   |                   |   |
| H                | -2.25420885663274 | 1.29740048053467  | - |
| 2.08516670142285 |                   |                   |   |
| H                | -0.84229363954791 | 4.78295494245318  | - |
| 2.17331680569362 |                   |                   |   |
| H                | -0.41919345253237 | 3.07815227235172  | - |
| 2.36075047577678 |                   |                   |   |
| C                | 3.69621744990498  | 3.83864494358744  |   |
| 2.90741323170001 |                   |                   |   |
| H                | 2.67320990974825  | 5.69755468072379  |   |
| 2.51579894481327 |                   |                   |   |
| H                | 2.88508512016973  | 4.66695377568837  |   |
| 1.09801915610553 |                   |                   |   |
| H                | 4.35293546469761  | 1.78852853363101  |   |
| 3.01045753437775 |                   |                   |   |
| H                | 3.88723639426504  | 2.32555513057782  |   |
| 1.39171980190384 |                   |                   |   |
| C                | -4.09261948595380 | 3.56612190674318  |   |
| 4.37549455482846 |                   |                   |   |

|                  |                   |                   |                   |
|------------------|-------------------|-------------------|-------------------|
| H                |                   | -3.19163902526322 | 5.50195839174373  |
| 4.06840829904836 |                   |                   |                   |
| H                |                   | -2.24206063181314 | 4.40554382525608  |
| 5.07583795152410 |                   |                   |                   |
| H                |                   | -4.53556778372470 | 1.46486405909559  |
| 4.59383037355076 |                   |                   |                   |
| H                |                   | -3.05207010105504 | 1.99317637242922  |
| 5.39762706944184 |                   |                   |                   |
| H                | -1.70081479626846 | -6.52262503917950 | -1.02732317004907 |
| H                | -0.24977790878744 | -6.66093329996619 | -0.03129614811724 |
| H                |                   | -3.59542850167892 | -3.82543121365614 |
| 7.48537459894445 |                   |                   |                   |
| H                |                   | -3.50288707931924 | -4.71982634157202 |
| 5.96616799152524 |                   |                   |                   |
| H                |                   | 5.39249567970342  | -4.31607265286897 |
| 3.41045738050982 |                   |                   |                   |
| H                |                   | 4.34012842425711  | -4.66197131858543 |
| 2.03602941431071 |                   |                   |                   |
| H                | -2.70603970811228 | 3.46766271630680  | -                 |
| 3.18581572903620 |                   |                   |                   |
| H                | -3.17100037250154 | 4.17302493607916  | -                 |
| 1.63569170191733 |                   |                   |                   |
| H                |                   | 4.69269717911411  | 4.24746016477461  |
| 2.72531645181431 |                   |                   |                   |
| H                |                   | 3.50264565076902  | 3.88926498423371  |
| 3.98104935997852 |                   |                   |                   |
| H                |                   | -4.64411447926551 | 3.86994095633157  |
| 5.26830110684323 |                   |                   |                   |
| H                |                   | -4.76080099762716 | 3.67659344516222  |
| 3.51797741424081 |                   |                   |                   |
| C                |                   | 0.34808144485844  | -0.12066201269630 |
| 4.41953343917741 |                   |                   |                   |
| C                |                   | 1.65047786833235  | -0.22551585872192 |
| 4.92176962154669 |                   |                   |                   |
| C                |                   | -0.63583413099227 | 0.16772539581651  |
| 5.37456319461331 |                   |                   |                   |
| C                |                   | 1.95375774656403  | -0.01753182370974 |
| 6.25885496798419 |                   |                   |                   |
| H                |                   | 2.47640166775001  | -0.46826020474042 |
| 4.26733565748367 |                   |                   |                   |
| C                |                   | -0.34298177870718 | 0.39038504745232  |
| 6.71132299486010 |                   |                   |                   |
| H                |                   | -1.67909473886722 | 0.19998308134233  |
| 5.08586790743138 |                   |                   |                   |

|                  |                   |                   |                   |
|------------------|-------------------|-------------------|-------------------|
| C                | 0.96076661716686  | 0.30682444611567  |                   |
| 7.16435557861837 |                   |                   |                   |
| H                | 2.98115610916517  | -0.10883661010657 |                   |
| 6.59502283022832 |                   |                   |                   |
| H                | -1.14302779397586 | 0.62358611349274  |                   |
| 7.40643151712108 |                   |                   |                   |
| H                | 1.19716138049742  | 0.47919375579659  |                   |
| 8.20863606769016 |                   |                   |                   |
| 3                |                   |                   |                   |
| C                | -0.57073545791080 | -0.89705589054916 | -0.00078320111693 |
| H                | -0.06233477570734 | -1.85344799803651 | -0.00129275315979 |
| C                | 0.13188097266417  | 0.23995910604610  | -                 |
| 0.00064371954718 |                   |                   |                   |
| C                | 1.54515015617065  | 0.25335999769453  | -                 |
| 0.00125154540693 |                   |                   |                   |
| C                | 2.75261529789198  | 0.30480952371157  | -                 |
| 0.00118553082939 |                   |                   |                   |
| C                | 4.16718812012373  | 0.32018092539595  | -                 |
| 0.00078589721237 |                   |                   |                   |
| C                | 4.86989906579894  | 0.32467218366490  |                   |
| 1.20537596242407 |                   |                   |                   |
| C                | 4.87086550985161  | 0.32336758494708  | -                 |
| 1.20637077107610 |                   |                   |                   |
| C                | 6.25178146644863  | 0.33124345465189  |                   |
| 1.20010853086365 |                   |                   |                   |
| H                | 4.32346249775116  | 0.32208125760902  |                   |
| 2.13747693396747 |                   |                   |                   |
| C                | 6.25275062305757  | 0.32999049284156  | -                 |
| 1.19997787432288 |                   |                   |                   |
| H                | 4.32520291754658  | 0.31994998515922  | -                 |
| 2.13891967825153 |                   |                   |                   |
| C                | 6.94636764753488  | 0.33366531320709  |                   |
| 0.00034252843125 |                   |                   |                   |
| H                | 6.79112581650194  | 0.33363936473997  |                   |
| 2.13621558224717 |                   |                   |                   |
| H                | 6.79285242956137  | 0.33160910840504  | -                 |
| 2.13565022059497 |                   |                   |                   |
| H                | 8.02637805883864  | 0.33746918011343  |                   |
| 0.00078396420105 |                   |                   |                   |
| C                | -2.04605968758562 | -0.91910569973913 | -0.00063388545000 |
| C                | -2.75039705447978 | -0.93435720257917 |                   |
| 1.19793882992768 |                   |                   |                   |
| C                | -2.75053200054886 | -0.92131225464147 | -1.19921542188657 |

|                  |                   |                   |                  |                   |
|------------------|-------------------|-------------------|------------------|-------------------|
| C                |                   | -4.13382045645612 |                  | -0.94701465474519 |
| 1.19721056349393 |                   |                   |                  |                   |
| H                |                   | -2.20782674425720 |                  | -0.93311929405374 |
| 2.13273569764195 |                   |                   |                  |                   |
| C                | -4.13395280997722 | -0.93448819323626 |                  | -1.19849331038514 |
| H                | -2.20804440220848 | -0.90993850709114 |                  | -2.13398265816865 |
| C                | -4.82875735560402 | -0.94613171146686 |                  | -0.00062779405781 |
| H                |                   | -4.67114223641107 |                  | -0.95624160547462 |
| 2.13451614894926 |                   |                   |                  |                   |
| H                | -4.67136425361418 | -0.93414542400926 |                  | -2.13579446587011 |
| H                | -5.90891189361373 | -0.95453007184705 |                  | -0.00061373660991 |
| C                |                   | -0.53450476741380 |                  | 1.57012896833857  |
| 0.00153298316380 |                   |                   |                  |                   |
| C                |                   | -0.86048552541174 |                  | 2.18704985926700  |
| 1.20229837277403 |                   |                   |                  |                   |
| C                | -0.84954000368294 |                   | 2.19747285963517 | -                 |
| 1.19672723322689 |                   |                   |                  |                   |
| C                |                   | -1.50375036901112 |                  | 3.41218069950114  |
| 1.20356209041323 |                   |                   |                  |                   |
| H                |                   | -0.61174387636290 |                  | 1.70224102230467  |
| 2.13569861333950 |                   |                   |                  |                   |
| C                | -1.49311595881425 |                   | 3.42245310526224 | -                 |
| 1.19314033179625 |                   |                   |                  |                   |
| H                | -0.59247410105486 |                   | 1.72081189057488 | -                 |
| 2.13205802594856 |                   |                   |                  |                   |
| C                |                   | -1.82338124008732 |                  | 4.03077144300323  |
| 0.00639035855080 |                   |                   |                  |                   |
| H                |                   | -1.75794478502449 |                  | 3.88421712300262  |
| 2.14156519456342 |                   |                   |                  |                   |
| H                | -1.73908205855106 |                   | 3.90261006848739 | -                 |
| 2.12922051737064 |                   |                   |                  |                   |
| H                |                   | -2.32832439740103 |                  | 4.98575278421539  |
| 0.00820297413802 |                   |                   |                  |                   |
| E                |                   |                   |                  |                   |
| Pd               | -0.45321672202469 | -0.42672752168108 |                  | 0.16308075181394  |
| P                | -2.66241650000236 | 0.04310947902304  |                  | -0.02953933986106 |
| P                |                   | 1.75250233284595  |                  | -0.93620664395362 |
| 0.25830722841121 |                   |                   |                  |                   |
| C                |                   | 2.18768753487233  |                  | -1.81472021482570 |
| 1.83726983308736 |                   |                   |                  |                   |
| C                |                   | 1.14728587818299  |                  | -2.91940375194819 |
| 2.03071557990153 |                   |                   |                  |                   |
| C                |                   | 3.59405953932198  |                  | -2.33043741215756 |

|                  |                  |                   |                   |
|------------------|------------------|-------------------|-------------------|
| 2.11784490434967 |                  |                   |                   |
| H                | 1.96845184982066 |                   | -1.03240708795878 |
| 2.58214420459714 |                  |                   |                   |
| C                | 1.21411250772196 |                   | -3.47154221653858 |
| 3.44884431586166 |                  |                   |                   |
| H                | 1.33290760291211 |                   | -3.72992546570547 |
| 1.32190071262693 |                  |                   |                   |
| H                | 0.14909958522538 |                   | -2.49740121198009 |
| 1.82089734039996 |                  |                   |                   |
| C                | 3.65326777407040 |                   | -2.87762695601754 |
| 3.54493715247378 |                  |                   |                   |
| H                | 3.85916195264262 |                   | -3.12796761231063 |
| 1.42535369494244 |                  |                   |                   |
| H                | 4.32337322214096 |                   | -1.52518975054346 |
| 2.00755886758879 |                  |                   |                   |
| C                | 2.62157364481810 |                   | -3.98552018346350 |
| 3.74449236855560 |                  |                   |                   |
| H                | 0.48889966970248 |                   | -4.27954188042166 |
| 3.57426045239866 |                  |                   |                   |
| H                | 0.96093091895562 |                   | -2.68117867427668 |
| 4.15957332997945 |                  |                   |                   |
| H                | 4.65590189728062 |                   | -3.26233240174533 |
| 3.75151608777414 |                  |                   |                   |
| H                | 3.45430851805910 |                   | -2.06886307723436 |
| 4.25312249447221 |                  |                   |                   |
| H                | 2.67512139121132 |                   | -4.36175368133578 |
| 4.76966766545157 |                  |                   |                   |
| H                | 2.85161055110947 |                   | -4.81723447035362 |
| 3.07310469780347 |                  |                   |                   |
| C                | 2.90885830846052 |                   | 0.51855917486287  |
| 0.17465150905564 |                  |                   |                   |
| C                | 4.29330832980911 | 0.32219576461409  | -                 |
| 0.43403158589698 |                  |                   |                   |
| C                | 2.14607135883487 | 1.59767586066513  | -                 |
| 0.60275679460825 |                  |                   |                   |
| H                | 3.02352694475938 | 0.85914404144293  |                   |
| 1.21277161563923 |                  |                   |                   |
| C                | 5.06172249511080 | 1.64336161892445  | -                 |
| 0.40710852294713 |                  |                   |                   |
| H                | 4.20094769904006 | -0.01018496169346 | -                 |
| 1.46953758639320 |                  |                   |                   |
| H                | 4.85355618514148 | -0.43643945611011 |                   |
| 0.11566116043309 |                  |                   |                   |
| C                | 2.90678780416915 | 2.91688657475556  | -                 |

|                  |                  |                   |   |  |
|------------------|------------------|-------------------|---|--|
| 0.59087600217155 |                  |                   |   |  |
| H                | 2.01197558559358 | 1.26317963329290  | - |  |
| 1.63668749356382 |                  |                   |   |  |
| H                | 1.14610098551487 | 1.71993941982492  | - |  |
| 0.15652828709265 |                  |                   |   |  |
| C                | 4.30485208921008 | 2.72463677202811  | - |  |
| 1.17380208321990 |                  |                   |   |  |
| H                | 6.05393532453406 | 1.50264392193226  | - |  |
| 0.84459263448906 |                  |                   |   |  |
| H                | 5.19715866086710 | 1.96293241142950  | - |  |
| 0.62967604394832 |                  |                   |   |  |
| H                | 2.36434425923729 | 3.67003913769723  | - |  |
| 1.16749913597444 |                  |                   |   |  |
| H                | 2.99032684592026 | 3.27825732979316  | - |  |
| 0.43735694543610 |                  |                   |   |  |
| H                | 4.86046204455258 | 3.66535896869059  | - |  |
| 1.13519535282295 |                  |                   |   |  |
| H                | 4.22087719372488 | 2.43018280680113  | - |  |
| 2.22311630402885 |                  |                   |   |  |
| C                | 2.12780295398756 | -1.97429289731998 | - |  |
| 1.24938580872146 |                  |                   |   |  |
| C                | 3.24894649745397 | -3.00579536814506 | - |  |
| 1.20230162106789 |                  |                   |   |  |
| C                | 0.81598096762866 | -2.65746431947957 | - |  |
| 1.65966745055829 |                  |                   |   |  |
| H                | 2.36528327654148 | -1.23337156148703 | - |  |
| 2.02557407656981 |                  |                   |   |  |
| C                | 3.40836187166469 | -3.65492233012084 | - |  |
| 2.57716155373285 |                  |                   |   |  |
| H                | 2.99992589047878 | -3.78402189956437 | - |  |
| 0.47884007041869 |                  |                   |   |  |
| H                | 4.19087958452992 | -2.54334059441636 | - |  |
| 0.90369283396855 |                  |                   |   |  |
| C                | 0.96206975877202 | -3.31746286632668 | - |  |
| 3.02508594826312 |                  |                   |   |  |
| H                | 0.55227696423612 | -3.41420331565916 | - |  |
| 0.91468944151798 |                  |                   |   |  |
| H                | 0.00536432629798 | -1.90278992781096 | - |  |
| 1.67652913463679 |                  |                   |   |  |
| C                | 2.10739274711977 | -4.32723621387101 | - |  |
| 3.00755724457555 |                  |                   |   |  |
| H                | 4.21592085465557 | -4.39175937873615 | - |  |
| 2.54749352163654 |                  |                   |   |  |
| H                | 3.68181799017446 | -2.89178908884192 | - |  |

|                  |   |                   |                   |   |
|------------------|---|-------------------|-------------------|---|
| 3.31071279970245 | H | 0.03097776278547  | -3.81833840544670 | - |
| 3.30187052704157 | H | 1.16748990404416  | -2.55346297902421 | - |
| 3.77976401333392 | H | 2.22906095203004  | -4.77436885437414 | - |
| 3.99785210049047 | H | 1.86855837235276  | -5.13146131950784 | - |
| 2.30672051228035 | C | -3.02768923684664 | 1.48600551220200  |   |
| 1.10203366179415 | C | -1.68029646274470 | 2.16577574777035  |   |
| 1.38369682608979 | C | -4.05387899103778 | 2.53063513313798  |   |
| 0.67883276515252 | H | -3.36284198622723 | 1.02214433567266  |   |
| 2.03967310917256 | C | -1.82625733024248 | 3.22428089839117  |   |
| 2.46951268346620 | H | -1.31434055673808 | 2.63409907795625  |   |
| 0.46356171065813 | H | -0.94640023396073 | 1.39612410127797  |   |
| 1.69256499563814 | C | -4.20967065627116 | 3.58284842111672  |   |
| 1.77668863035266 | H | -3.71357845940417 | 3.02861986067503  | - |
| 0.23054841949718 | H | -5.02009152980820 | 2.06470221654301  |   |
| 0.47889505551600 | C | -2.87258172788781 | 4.25985052807167  |   |
| 2.06503224671330 | H | -0.86618771304535 | 3.71568202593884  |   |
| 2.64565954770780 | H | -2.13367283208528 | 2.74769789445692  |   |
| 3.40447316963462 | H | -4.94693616609939 | 4.32988900183389  |   |
| 1.46941271147980 | H | -4.57928334864127 | 3.10702253437460  |   |
| 2.68894421981754 | H | -2.99360929047731 | 5.00160899322525  |   |
| 2.85903396430167 | H | -2.53311882139665 | 4.78480276620598  |   |
| 1.16832714058222 | C | -3.91090753098533 | -1.27536811872965 |   |



|                  |                   |                   |                   |                   |
|------------------|-------------------|-------------------|-------------------|-------------------|
| 0.37870023176236 |                   |                   |                   |                   |
| C                |                   | -3.22035488997035 |                   | -2.18046497084216 |
| 1.40427150165953 |                   |                   |                   |                   |
| C                |                   | -5.27707900806557 |                   | -0.84006640555766 |
| 0.89800547861281 |                   |                   |                   |                   |
| H                | -4.04914191472249 |                   | -1.84863164966037 | -0.54786476044486 |
| C                |                   | -4.07497930363165 |                   | -3.39969598548167 |
| 1.72330365016981 |                   |                   |                   |                   |
| H                |                   | -3.04053178268625 |                   | -1.60867898480208 |
| 2.32048334736100 |                   |                   |                   |                   |
| H                |                   | -2.24213333623541 |                   | -2.48576101781969 |
| 1.00349907859067 |                   |                   |                   |                   |
| C                |                   | -6.13502686202197 |                   | -2.06842168399128 |
| 1.20041474910445 |                   |                   |                   |                   |
| H                |                   | -5.15969756454765 |                   | -0.26127965969193 |
| 1.81589817281673 |                   |                   |                   |                   |
| H                |                   | -5.78505458724265 |                   | -0.21079128488498 |
| 0.16459506430337 |                   |                   |                   |                   |
| C                |                   | -5.44858925959193 |                   | -2.96446740635659 |
| 2.22769393784831 |                   |                   |                   |                   |
| H                |                   | -3.58100823968142 |                   | -4.01903800693446 |
| 2.47584346487449 |                   |                   |                   |                   |
| H                |                   | -4.19718179889954 |                   | -4.00335596502090 |
| 0.82019610645119 |                   |                   |                   |                   |
| H                |                   | -7.11251274009202 |                   | -1.75255326130126 |
| 1.57564206769266 |                   |                   |                   |                   |
| H                |                   | -6.29886680733390 |                   | -2.63419535083949 |
| 0.27920408401075 |                   |                   |                   |                   |
| H                |                   | -6.06921921349440 |                   | -3.84131103358117 |
| 2.43090131675905 |                   |                   |                   |                   |
| H                |                   | -5.33189049334030 |                   | -2.41469482637697 |
| 3.16533440721108 |                   |                   |                   |                   |
| C                |                   | -2.99101345870804 | 0.45626469934631  | -                 |
| 1.81284011945666 |                   |                   |                   |                   |
| C                |                   | -4.36023712697234 | 0.91830605745202  | -                 |
| 2.29752730745321 |                   |                   |                   |                   |
| C                |                   | -1.88966142675267 | 1.41819564294045  | -                 |
| 2.26466254097430 |                   |                   |                   |                   |
| H                | -2.78438709169923 |                   | -0.51495888502995 | -2.29202473702117 |
| C                |                   | -4.34110731383790 | 1.03004174238673  | -                 |
| 3.82260989152375 |                   |                   |                   |                   |
| H                |                   | -4.61226209137675 | 1.89104122568938  | -                 |
| 1.87840094574465 |                   |                   |                   |                   |
| H                |                   | -5.13027240843491 | 0.20583947454271  | -                 |

|                  |                   |                   |                   |   |
|------------------|-------------------|-------------------|-------------------|---|
| 1.99407957638781 |                   |                   |                   |   |
| C                | -1.88272555094780 |                   | 1.54402815138949  | - |
| 3.78322091468157 |                   |                   |                   |   |
| H                | -2.05808068816192 |                   | 2.40460437337950  | - |
| 1.82627582591256 |                   |                   |                   |   |
| H                | -0.91816472850661 |                   | 1.03585224778121  | - |
| 1.89759165008132 |                   |                   |                   |   |
| C                | -3.25344548056067 |                   | 1.99951889543856  | - |
| 4.27914267129816 |                   |                   |                   |   |
| H                | -5.31655773186067 |                   | 1.37047202806542  | - |
| 4.18076477975321 |                   |                   |                   |   |
| H                | -4.15133389500060 |                   | 0.04513229977288  | - |
| 4.25725744024395 |                   |                   |                   |   |
| H                | -1.11781866931664 |                   | 2.25812779021404  | - |
| 4.09852746340273 |                   |                   |                   |   |
| H                | -1.64184053273309 |                   | 0.57609340925163  | - |
| 4.22883652892408 |                   |                   |                   |   |
| H                | -3.25182042230222 |                   | 2.06874690764441  | - |
| 5.37016986383012 |                   |                   |                   |   |
| H                | -3.46932824690496 |                   | 2.99549388357253  | - |
| 3.88346343951770 |                   |                   |                   |   |
| HOAc             |                   |                   |                   |   |
| C                | -3.69090819598027 | -0.44257248214004 | -0.18324021679256 |   |
| O                | -2.65556821317915 | -0.34010608253837 | -0.79900594145764 |   |
| O                |                   | -4.33360431331276 | 0.60393050222270  |   |
| 0.32028189062168 |                   |                   |                   |   |
| H                |                   | -3.88742179499790 | 1.45055121621369  |   |
| 0.13588940071534 |                   |                   |                   |   |
| C                |                   | -4.41058173223543 | -1.73211056993930 |   |
| 0.09391312540058 |                   |                   |                   |   |
| H                |                   | -5.05313658877277 | -1.61513626751036 |   |
| 0.96090153199804 |                   |                   |                   |   |
| H                | -5.02356758190431 | -1.97561970786184 | -0.77216937511541 |   |
| H                |                   | -3.69208476856091 | -2.53288925891903 |   |
| 0.24205458412540 |                   |                   |                   |   |

## 6. References

[1] Bannwarth, C.; Caldeweyher, E.; Ehlert, S.; Hansen, A.; Pracht, P.; Seibert, J.; Spicher, S. Grimme, S. Extended tight-binding quantum chemistry methods. *WIREs Comput. Mol. Sci.* **2021**, *11*, e1493.
